# Supplementary material for: Gut microbiota induces high platelet response in patients with ST segment elevation myocardial infarction after ticagrelor treatment
Source: eLife. 2022 Mar 8;11:e70240. doi: 10.7554/eLife.70240 (PMC8903831; doi:10.7554/eLife.70240)
Supplement: Appendix 1—figure 1—source data 1. [file elife-70240-app1-fig1-data1.xlsx]

## Sheet: Sheet1
	1								ARC	1	2	4	6	24			TIC	1	2	4	6	24
	CO		10691		10694				CO								CO
	531	2429.62	574	1741.02	527	1695.99			531	386.456	453.749	224.396					531	2429.62	893.457	427.901
	532	2205.72	575	1328.41	528	963.026			532	284.479	454.45	281.07					532	2205.72	1241.25	592.707
	533	1503.64	576	1217.45	529	526.403			533	174.372	253.984	186.201	12.46				533	1503.64	1326.06	387.281	321.092
	534	1577.65	577	1038.08	530	1431.94			534	219.047	220.939	185.823	48.123	225.538			534	1577.65	730.966	363.46	98.966	345.197
	535	1161.83	578	1856.61	552	604.357			535	301.424	350.598	275.383					535	1161.83	626.242	401.99
	536	764.034	579	2145.19	554	982.203			536	273.454	154.743	199.1	4.481				536	764.034	338.868	236.288	141.351
	537	1248.34	580	2754.2					537	289.695	274.449	201.908					537	1248.34	568.853	353.769
										275.561	308.987	221.983	21.688	225.538				1555.83	817.956	394.771	187.136	345.197
										61.7407	106.643	37.537	18.9741	0				543.243	333.583	98.679	96.2885	0
									10691								10691
									574	220.388	386.799	375.103	62.528				574	1741.02	1257.98	490.703	168.392
	2								575	209.102	369.231	11.763	132.644				575	1328.41	1138.73	370.284	151.519
	CO		10691		10694				576	308.553	462.204	350.04	193.253				576	1217.45	1253.86	851.748	393.421
	531	893.457	574	1257.98	527	565.981			577	289.322	172.731	183.691					577	1038.08	376.973	242.991
	532	1241.25	575	1138.73	528	661.531			578	227.094	487.459	434.345	99.946				578	1856.61	1283.64	500.815	159.185
	533	1326.06	576	1253.86	529	270.251			579	405.717	274.664	201.717	5.25	215.469			579	2145.19	991.421	271.368	114.807	411.331
	534	730.966	577	376.973	530	1253.27			580	551.474	559.174	508.967	141.908				580	2754.2	1321.22	694.536	197.099
										315.95	387.466	295.089	105.921	215.469				1725.85	1089.12	488.921	197.404	411.331
										115.101	122.028	158.547	60.124	0				552.932	308.573	205.618	90.9696	0
	535	626.242	578	1283.64	552	459.668				0.463401	0.258507	0.293293	0.0751157	#DIV/0!				0.6009	0.169521	0.331889	0.894104	#DIV/0!
	536	338.868	579	991.421	554	55.728			10694								10694
	537	568.853	580	1321.22					527	507.938	290.248	288.373	107.56				527	1695.99	565.981	284.544	133.811
									528	247.735	275.355	18.063	70.018				528	963.026	661.531	292.899	132.694
									529	158.879	39.69	2.668	1.776	148.044			529	526.403	270.251	142.26	38.354	299.634
									530	455.295	527.471	382.467					530	1431.94	1253.27	670.587
									552	203.914	158.71	141.822	50.523				552	604.357	459.668	337.213	69.251
									554	272.601	134.524	119.037	21.101				554	982.203	55.728	237.314	60.807
										307.727	237.666	158.738	50.1956	148.044				1033.99	544.404	327.469	86.9834	299.634
										128.858	155.048	137.155	37.0801	0				417.643	373.678	164.971	39.1069	0
										0.600262	0.388087	0.304875	0.324902	#DIV/0!				0.105554	0.226025	0.422051	0.124707	#DIV/0!
