# Supplementary material for: Gut microbiota induces high platelet response in patients with ST segment elevation myocardial infarction after ticagrelor treatment
Source: eLife. 2022 Mar 8;11:e70240. doi: 10.7554/eLife.70240 (PMC8903831; doi:10.7554/eLife.70240)
Supplement: Appendix 1—figure 1—source data 4. [file elife-70240-app1-fig1-data4.xlsx]

## Sheet: Sheet1
	0.03	0.06	0.09
‘001	86.1	86.7	91.8		76.8667	87.0667	89.6667		0.663676	0.00870558	0.0117762
’002	68.7	84.3	86.9
‘003	75.8	90.2	90.3
‘004	75.4	77.7	78.9		74.3333	78.4667	81.3333
‘005	70.6	79.5	82.3
‘006	77	78.2	82.8
101	76.6	87.6	89.1		82.7	87.5667	88.9		0.249115	0.0504729	0.0154528
102	87.6	90.3	90.6
103	83.9	84.8	87
104	83.9	83.9	84.8		75.6	79.1	82.3
105	70.9	74.9	81.1
106	72	78.5	81
401	80.2	81	89.5		79.6333	81.7333	85.3333		0.675761	0.270727	0.555117
402	78.1	79.5	80.8
403	80.6	84.7	85.7
404	81.3	84.5	88.7		80.1667	84	87.1
405	78.4	85.2	87.6
406	80.8	82.3	85
