# Supplementary material for: Gut microbiota induces high platelet response in patients with ST segment elevation myocardial infarction after ticagrelor treatment
Source: eLife. 2022 Mar 8;11:e70240. doi: 10.7554/eLife.70240 (PMC8903831; doi:10.7554/eLife.70240)
Supplement: Figure 1—source data 1. [file elife-70240-fig1-data1.xlsx]

## Sheet: Sheet1
分组(1=正常,2=延迟)	编号	病人姓名	HISID	入院日期	住院时间(d)	手机号	24hMACCE(心源性死亡、心衰、再梗、卒中)	住院期间MACCE(心源性死亡、心衰、再梗、卒中)	6个月随访事件	事件时间 (6个月)	12个月随访事件	事件时间 (12个月)
2	A-1	关昌华
1	A-2	王景玉	6034263	2016-03-30	9
2	A-3	黄雅珍	6033897	2016-04-02	5
2	A-4	宋洪财	1002961513	2016-04-16	9
1	A-5	刘兴利	1001045444	2016-04-22	7
1	A-6	王静	ST11116009	2016-04-28	6
1	A-7	于海	1000473770	2016-04-29	6
1	A-8	翁立伟	1000075161	2016-04-30	6
1	A-9	杨聪明	ST11054828	2016-04-30	11
1	A-10	张井山	5996007	2016-04-30	7
2	A-11	张德安	5998181	2016-05-02	33
2	A-12	朱庆俊	5998132	2016-05-03	10
1	A-13	郭忠民	1004254813	2016-05-03	7	13386891498
1	A-14	傅秀云	1001941842	2016-05-03	3
1	A-15	刘英凯	1002056924	2016-05-05	8
2	A-16	王思元	5997797	2016-05-06	9
1	A-17	张宗哲	1004000754	2016-05-05	4
2	A-18	郎恩沛	1005778906	2016-05-06	6
2	A-19	邵辉	1000479537	2016-05-08	8
2	A-20	陈政显	5997376	2016-05-08	9
1	A-21	赵世荣	5997375	2016-05-08	8	18841468749					空号	2017-04-28
2	A-22	王晖	1003921772	2016-05-09	7
2	A-23	郭玉恩	5997225	2016-05-10	10
2	A-24	吴永明	ST33014903	2016-05-11	9
1	A-25	程朝阳	1006383882	2016-05-11	4
1	A-26	孟广毅	1001045644	2016-05-12
1	A-27	张晨光	1007370434	2016-05-15	5
2	A-28	金凤艳	5948318	2016-05-17	13
1	A-29	王文敏	1003721080	2016-05-18	5
2	A-30	阚魁武	1007082045	2016-05-18	9
2	A-31	邱林	5947902	2016-05-20	11						心衰	日期
1	A-32	葛长有	1000957813	2016-05-20	7	13889332112
2	A-33	史雪峰	1005742879	2016-05-24	3	13614165006					缺血性脑血管病	2017-01-12
2	A-34	王德俊	6102006	2016-05-24	8
1	A-35	杨义新	1007409103	2016-05-26	5	13804983864
2	A-36	杨玉英	1007577541	2016-05-26	6						再梗	2017-05-25
1	A-37	刘忠沪	6102598	2016-05-31	3	13204271881
2	A-38	叶万芳	ST11087880	2016-06-04	5	ST11087880
1	A-39	吴晓峰	1002564901	2016-06-04	6	1002564901
1	A-40	李军	1005573702	2016-06-05	3	13998288243
1	A-41	付永年	ST11051012	2016-06-06	4	13840133130			停机	2016-12-01	停机	2016-12-01
1	A-42	吴作卿	6101269	2016-06-07	7	15941575252
2	A-43	郭世忠	1001507176	2016-06-07	6
1	A-44	张玉芹	6101252	2016-06-07	8	13022483611			死亡-心衰	2017.01.15	死亡	2017-01-15
2	A-45	于国忠	6101235	2016-06-08	5			死亡-心脏破裂			死亡	2016-06-13
2	A-46	武新柱	6112699	2016-06-11	6	13940080747
2	A-47	刘国伟	1000068439	2016-06-12	5	88134773
2	A-48	王刚	4864873	2016-06-12	2
1	A-49	佐常英	1002844308	2016-06-13	7	13804028615
2	A-50	郑国连	ST23022526	2016-06-15	6	13942775518
1	A-51	邱宝东	1001548796	2016-06-16	4	13080832418
1	A-52	杨福成	ST11081294	2016-06-15
2	A-53	路绵海	6105186	2016-06-17	14
1	A-54	王珍珠	6105151	2016-06-18	5	13940719108					未接通	2017-06-18
1	A-55	许元抚	1002025634	2016-06-18	4	13654067960			未接通	2016-12-18	未接通	2016-12-18
2	A-56	刘平	6104714	2016-06-22	9
1	A-57	王涛	6104682	2016-06-22	5	15941000405
1	A-58	刘廷胜	1007677255	2016-06-21	7	18609880958-未接通
1	A-59	刘成信	2000023888	2016-06-23	10	13889832232		左心衰		2016-08-23	死亡	2017-06-20
1	A-60	高波	1007708972	2016-06-24	6	13252800199
2	A-61	田英	1006144906	2016-06-26	7
2	A-62	金明玉	6100740	2016-06-27	11	13942495576-关机
1	A-63	雷灵	HL06723949	2016-06-27	4	18640167067
1	A-64	李振元	6104520	2016-06-28	7	18842470188			号码错误	2016-12-28	号码错误	2016-12-28
1	A-65	姜文贤	6104322	2016-06-29	4	15840521276
2	A-66	李坤德	1007739762	2016-06-30	5	13909883699
2	A-67	卜宝军	1004285444	2016-06-30	7	13889149988
2	A-68	宁艳平	6104307	2016-06-30	2	15009803123
1	A-69	李久臣	6104053	2016-07-02	12	13898874611					号码错误	2017-01-10
1	A-70	薛桂芝	6205215	2016-07-08	5	18240324032
1	A-71	马德才	6204813	2016-07-11	4	13841843822
2	A-72	郝先超	1005615076	2016-07-12	11	15040200586		心衰			心衰	2016-07-19
2	A-73	刘维坤	1006106084	2016-07-17	6	13624005822			未接通	2017-01-15		2017-01-15
1	A-74	张恩辉	1004390735	2016-07-18	7	15840269689
2	A-75	马勤礼	6203296	2016-07-21	8	18641451167
2	A-76	孙秀华	1006847037	2016-07-24	8	15041399364
2	A-77	李克朋	6202858	2016-07-24	2	13998268452
2	A-78	郎雪冰	1003163823	2016-07-25	5
1	A-79	郑连俊	1006347670	2016-07-25	7	13840261231/13700032993				2016-08-28	卒中	2016-08-28
1	A-80	刘跃斌	1002928526	2016-07-30	6	13998164652
2	A-81	伊魁元	6201982	2016-07-30	6	13700044268
1	A-82	孙传辉	1002106427	2016-08-01	7	13889125442
1	A-83	王连生	1002190188	2016-08-05	6	13940082996			未接通	2017-02-01		2017-02-01
2	A-84	龚庆朋	6200603	2016-08-09	10	15940020232
1	A-85	段兴权	1006958832	2016-08-09	7	13066666882			急性脑梗死	2016-08-20	急性脑梗死	2016-08-20
2	A-86	王玉竹	1002064118	2016-08-09	8	13898189812
2	A-87	朱秀珍	6288747	2016-08-11	7	15941434331
1	A-88	邵光	6288699	2016-08-11	2
1	A-89	冮毅	ST11039358	2016-08-12	12	13998351117
2	A-90	王彦	1002468608	2016-08-13	8	15998314342			未接通	2017-02-10		2017-02-10
1	A-91	李秀凤	1001952742	2016-08-14	12
1	A-92	李守民	1004949523	2016-08-16	8	13889295445
1	A-93	陈森	1001611603	2016-08-19	7	13998250888			号码错误	2017-03-20		2017-03-20
1	A-94	郭庆华	1003920450	2016-08-20	7	13998222240
1	A-95	张玉珍	6284577	2016-08-21	4	18802431133			空号	2017-02-21		2017-02-21
2	A-96	谭建华	ST11064971	2016-08-27	18	13940467422		心衰			死亡	2017-03-20
1	A-97	方贺营	1003930655	2016-08-29	6	15840594118
2	A-98	郑国祥	1002052348	2016-08-30	1		死亡-心脏破裂				死亡	2016-08-30
1	A-99	张林	1004477999	2016-08-30	6	13700042900
2	A-100	王铁军	6286052	2016-09-01	4	13050975999			未接通	2017-03-01		2017-03-01
2	T-01	涂成方	1000277647	2016-09-02	5	13624937717
2	T-02	施振清	ST23041555	2016-09-09	6	15204255045
1	T-03	孙俊余	6357847	2016-09-09	9	13030765780-未接通
2	T-04	程玉珍	1003683057	2016-09-13	1	13066580156-未接通	死亡-心脏骤停				死亡-心脏骤停	2017-09-13
2	T-05	姚彬	2000035908	2016-09-16	4	13644057788
2	T-06	王维芬	6353684	2016-09-16	5	13804924888
1	T-07	陶纯宝	6353686	2016-09-17	1	13998116775
1	T-08	王东栋	LN00020928	2016-09-17	4	13700034410-未接通
2	T-09	关丽娟	6354996	2016-09-25	4	13066618287
1	T-10	李东生	1001127212	2016-10-08	6	13840108298-未接通
1	T-11	孙桂侠	1005045076	2016-10-10	5	13516089876
1	T-12	李志	6396735	2016-10-12	6	15002462608
2	T-13	刑宝芝	1006965018	2016-10-15	4	13066664311
2	T-14	张春阳	6357031	2016-10-16	10	13840471071
1	T-15	杜国润	6357079	2016-10-17	8	15840502929-未接通
2	T-16	刘素珍	6357178	2016-10-17	7	13998304232
1	T-17	曹明礼	1006427644	2016-10-21	4	13889171368
1	T-18	孟庆民	3157901	2016-10-21	5	15998227573-空号
2	T-19	赵永芳	6418603	2016-10-24	21	18742424306	急性心衰	急性心衰肝肾不全房颤、
2	T-20	王保岩	2000015211	2016-10-26	5
1	T-21	刘阳	1002727229	2016-10-26	6	15040316438
	T-22	苏广君	1002803069	2016-10-29
2	T-23	张焕林	1001141010	2016-10-31	5	15840188156
1	T-24	窦全福	1001339404	2016-11-01	9	18698899751
1	T-25	牛贵军	1004011781	2016-11-02	6
1	T-26	陈克忠	1001043101	2016-11-03	6
1	T-27	赵海全	6402025	2016-11-06	4
2	T-28	吴龙兵	1003094516	2016-11-07	5
2	T-29	刘晓东	6401802	2016-11-08	16
2	T-30	胡强	1002935512	2016-11-08	4
2	T-31	朱桂莲	1007611718	2016-11-08	6
1	T-32	刘鼎	1004997864	2016-11-10	5
2	T-33	赵卫民	1002803016	2016-11-10	5
2	T-34	陈禹	1001031910	2016-11-10	12
2	T-35	汪云佐	6407283	2016-11-14	6
1	T-36	杨庆文	6407350	2016-11-14	6
1	T-37	周文峰	6410348	2016-11-15	9
2	T-38	赵凤艳	6410378	2016-11-15	8
2	T-39	胡忠武	6410357	2016-11-15	5
2	T-40	李丽华	1004066601	2016-11-18	18
2	T-41	苗丰域	1002173848	2016-11-19	6
1	T-42	石长垠	1004039418	2016-11-20	6
2	T-43	杨兴国	1000308212	2016-11-21	7
2	T-44	吴剑波	1000882852	2016-12-01	8
1	T-45	孙东涛	1000561538	2016-12-06	2
2	T-46	刘志友	1000092828	2016-12-07	6
1	T-47	齐万龙	6440816	2016-12-10	5
1	T-48	刘锡财	6442474	2016-12-21	4
2	T-49	刘克勤	1005635139	2016-12-23	7
1	T-50	王春来	10012174690	2016-12-25	3
1	T-51	薛荫双	6441627	2016-12-29	11
2	T-52	于德海	6441506	2016-12-30	3
2	T-53	连茂安	6331653	2016-12-31	12
2	T-54	孙素贤	6443616	2016-12-31	14
1	T-55	杨鲸威	6443439	2017-01-01	6
2	T-56	赵永亮	1002905053	2017-01-01	4
2	T-57	邱文华	1004485240	2017-01-03	7
1	T-58	张英杰	1000291221	2017-01-12	7
2	T-59	刘向阳	6390138	2017-01-19	5
2	T-60	祁忠祥	1002510089	2017-01-20	4
1	T-61	张玉兰	6389537	2017-01-23	3
1	T-62	杨伟春	1002831790	2017-02-03	5
1	T-63	张克莲	6388110	2017-02-05	3
1	T-64	郭欣荣	6580443	2017-02-09	4
1	T-65	于福新	6580441	2017-02-09	32
1	T-66	商泽斌	6579962	2017-02-12	4
1	T-67	白晶	6579926	2017-02-13	7
2	T-68	佟邵全	6579622	2017-02-14	5
2	T-69	王春朴	1000207114	2017-02-23	5
2	T-70	姚英才	6560154	2017-02-23	3
1	T-71	崔文平	1000389661	2017-02-24	5
2	T-72	杨书义	1002033844	2017-02-26	4
2	T-73	赵洪祥	1006965145	2017-03-08	7
2	T-74	刘家来	1000079854	2017-03-09	7
1	T-75	王清海	1002654330	2017-03-13	7
