# Supplementary material for: Gut microbiota induces high platelet response in patients with ST segment elevation myocardial infarction after ticagrelor treatment
Source: eLife. 2022 Mar 8;11:e70240. doi: 10.7554/eLife.70240 (PMC8903831; doi:10.7554/eLife.70240)
Supplement: Figure 1—source data 2. [file elife-70240-fig1-data2.xlsx]

## Sheet: Sheet1
分组(1=正常反应组；2=延迟反应组)					光比浊法检测血小板聚集率(AUC%)
	编号	姓名	ID号	入院日期	AUC 0h	AUC 1h	AUC 2h	AUC 4h	AUC 6h	AUC 8h	AUC 12h	AUC 16h	AUC 18h	AUC 20h	AUC 24h	AUC48h
2	A-1	关昌华/NSTEMI	ST11010868	2016-03-29			83.8	68.4
1	A-2	王景玉	6034263	2016-03-30			52.8	16.9			27.2
2	A-3	黄雅珍	6033897	2016-04-02			62.8	52.2
2	A-4	宋洪财	1002961513	2016-04-16			60.9	5.1
1	A-5	刘兴利	1001045444	2016-04-22			23.4	14.6
1	A-6	王静	ST11116009	2016-04-28			1.7	1
1	A-7	于海	1000473770	2016-04-29			36.1	19.3		27.2
1	A-8	翁立伟	1000075161	2016-04-30			9.4	18.7
1	A-9	杨聪明	ST11054828	2016-04-30			45.5	17.8
1	A-10	张井山	5996007	2016-04-30			29.2	40.5			22
2	A-11	张德安	5998181	2016-05-02			91.1	90.3		36.9
2	A-12	朱庆俊	5998132	2016-05-03			76.1	74.6		72.5
1	A-13	郭忠民	1004254813	2016-05-03			31.1	12.2		21.5	26.6
1	A-14	傅秀云	1001941842	2016-05-03			47.6	30.5		24.4
1	A-15	刘英凯	1002056924	2016-05-05			未检出	25.8	39.7	16.6
2	A-16	王思元	5997797	2016-05-06			62.5	60.6		63.4	57.8
1	A-17	张宗哲	1004000754	2016-05-05			32.5	未检出	45.3		27.3
2	A-18	郎恩沛	1005778906	2016-05-06			86.3	57.1
2	A-19	邵辉	1000479537	2016-05-08			71.9	45.7		33.7
2	A-20	陈政显	5997376	2016-05-08			69.2	62.3		58.4	31.2
1	A-21	赵世荣	5997375	2016-05-08			39	34.3		67.1	38.6
2	A-22	王晖	1003921772	2016-05-09			71.9	54.4		30.8
2	A-23	郭玉恩	5997225	2016-05-10			71	76.1	67.4
2	A-24	吴永明	ST33014903	2016-05-11			63.7	1.4		1.9
1	A-25	程朝阳	1006383882	2016-05-11			52.6	30.5
1	A-26	孟广毅	1001045644	2016-05-12			41.8	26.9
1	A-27	张晨光	1007370434	2016-05-15			36.1	59.5
2	A-28	金凤艳	5948318	2016-05-17			81.4	42.2
1	A-29	王文敏	1003721080	2016-05-18			11.6	12.6
2	A-30	阚魁武	1007082045	2016-05-18			68.1	29.5
2	A-31	邱林	5947902	2016-05-20			66.5	57
1	A-32	葛长有	1000957813	2016-05-20			55.2	49.6
2	A-33	史雪峰	1005742879	2016-05-24			60.8	30.7	24.3
2	A-34	王德俊	6102006	2016-05-24			90.6	60.2	41.3
1	A-35	杨义新	1007409103	2016-05-26			48.6	54.2	49.3
2	A-36	杨玉英	1007577541	2016-05-26			71.6	57.7	72.4
1	A-37	刘忠沪	6102598	2016-05-31			6.9	6.5	59.4
2	A-38	叶万芳	ST11087880	2016-06-04			68.2	61.2			24.9
1	A-39	吴晓峰	1002564901	2016-06-04			24.7	27.2
1	A-40	李军	1005573702	2016-06-05			47.9	33
1	A-41	付永年	ST11051012	2016-06-06			17.6	27.3
1	A-42	吴作卿	6101269	2016-06-07			21.7	33.3	47.4
2	A-43	郭世忠	1001507176	2016-06-07			60.9	66.5	53.8
1	A-44	张玉芹	6101252	2016-06-07			9.6	29.3
2	A-45	于国忠	6101235	2016-06-08			74.1	66.5
2	A-46	武新柱	6112699	2016-06-11			76.7	53.5		52.1
2	A-47	刘国伟	1000068439	2016-06-12			95	63.2
2	A-48	王刚	4864873	2016-06-12			92.2	67.7
1	A-49	佐常英	1002844308	2016-06-13			44.7	44.2	40.4		51.5
2	A-50	郑国连	ST23022526	2016-06-15			97.5	75.5	63.7
1	A-51	邱宝东	1001548796	2016-06-16			14	46
1	A-52	杨福成/UA	ST11081294	2016-06-15			53.9	68
2	A-53	路绵海	6105186	2016-06-17			94.8	30.6	40.8		39.6
1	A-54	王珍珠	6105151	2016-06-18			35.6	1	36.5
1	A-55	许元抚	1002025634	2016-06-18			44	16.7	26.1	19
2	A-56	刘平	6104714	2016-06-22			77.5	50.8	44.5
1	A-57	王涛	6104682	2016-06-22			21.3	13.1	4.8
1	A-58	刘廷胜	1007677255	2016-06-21			58	45.1
1	A-59	刘成信	2000023888	2016-06-23			1.6	13.7	2.2						36.7
1	A-60	高波	1007708972	2016-06-24	64.4		30.2	20.9	50.5
2	A-61	田英	1006144906	2016-06-26	88		90.7	86.4	13.4
2	A-62	金明玉	6100740	2016-06-27	85.2		62.9	36.9	24.9
1	A-63	雷灵	HL06723949	2016-06-27	85.1		36.2	31.6	43.5
1	A-64	李振元	6104520	2016-06-28	70.2		18.1	38.8	40.8		32.8
1	A-65	姜文贤	6104322	2016-06-29	84.5		33.5	20.3	35.1
2	A-66	李坤德	1007739762	2016-06-30	17.9(71.9)		63.3	61	61.5
2	A-67	卜宝军	1004285444	2016-06-30	51.9		59.6	56.2	58.8
2	A-68	宁艳平	6104307	2016-06-30	67.1		60.7	28.6	13.6						29.1
1	A-69	李久臣	6104053	2016-07-02			33.6	34.1	20.2
1	A-70	薛桂枝	6205215	2016-07-08	88.6		53.7	31.4	61.2		46.1
1	A-71	马德才	6204813	2016-07-11	91.9		14.6	31.5	39.4
2	A-72	郝先超	1005615076	2016-07-12	36.5		76.5	75.4	52.2	46.2
2	A-73	刘维昆	6203872	2016-07-17	88.4		90.2	95.5			75.6
1	A-74	张恩辉	1004390735	2016-07-18	22.9		36.3	28.9	33.5	37.5
2	A-75	马勤礼	6203269	2016-07-21			83.9	92.9	91.3	63.4
2	A-76	孙秀华	1006847037	2016-07-24	93.5		67.2	72.1		83
2	A-77	李克朋	6202858	2016-07-24	16.5		72.5	76.9	70.2	87
2	A-78	郎雪冰	1003163823	2016-07-25			78.7	6.4	9.1	2.3
1	A-79	郑连俊	6202773	2016-07-25			11.5	9.2	3.9		16.9
1	A-80	刘跃斌	1002928526	2016-07-30			3	1.3	33.5
2	A-81	伊魁元	6201982	2016-07-30			64.3	39.7	24		30.6
1	A-82	孙传辉	1002106427	2016-08-01			19.4	11.3	2.1		11.3
1	A-83	王连生	1002190188	2016-08-05	58.1		58.7	20.1	35.1	30
2	A-84	龚庆朋	6200603	2016-08-09			79.5	73.1	17.8
1	A-85	段兴权	1006958832	2016-08-09	79.3		15.1	3.8	3.9	4.2
2	A-86	王玉竹	1002064118	2016-08-09			94.3	23	34	4.8
2	A-87	朱秀珍	6288747	2016-08-11	80.5		79	74	49.1	38.7
1	A-88	邵光	6288699	2016-08-11	74.5		21.4
1	A-89	冮毅	ST11039358	2016-08-12	21.3		56.5	31.4	37.8
2	A-90	王彦	1002468608	2016-08-13	80.6		90.9	89.8	90
1	A-91	李秀凤	1001952742	2016-08-14	28.1		6				64.8
1	A-92	李守民	1004949523	2016-08-16	83.1		55.7	47.9	24.2						19
1	A-93	陈森	1001611603	2016-08-19	44.1		14.6	28	33.3
1	A-94	郭庆华	1003920450	2016-08-20			49.4	50.2	38.2	27.6					8.6
1	A-95	张玉珍	6284577	2016-08-21			38.4	36	26.5	23.9					9.7
2	A-96	谭建华	ST11064971	2016-08-27			72.3	73.2	58.3	38.8					49.9
1	A-97	方贺营	1003930655	2016-08-29	31.9		17.7	19.5	15.8						17.4
2	A-98	郑国祥	1002052348	2016-08-30	24.2		71.2	73.1	72.4	44.8
1	A-99	张林	1004477999	2016-08-30	15.9		48.9	19.9	3
2	A-100	王铁军	6286052	2016-09-01	90.8		95.9	66.9	42.6		72.6
2	T-1	涂成方	1000277647	2016-09-02			80.2	70.8	80.8		18
2	T-2	施振清	ST23041555	2016-09-09			87.9	75.4	43.3		39
1	T-3	孙俊余	6357847	2016-09-09			30.8	24.4	15.4		18.5
2	T-4	程玉珍	1003683057	2016-09-13			60.5	31	16.2
2	T-5	姚彬	2000035908	2016-09-16	60		64	50	51.8		19.2				8.9
2	T-6	王维芬	6353684	2016-09-16	40.3		84.3	80.3	82.7						35.3
1	T-7	陶纯宝	6353686	2016-09-17	54.4		45.6	42.2	50
1	T-8	王东栋	LN00020928	2016-09-17			47.4	42.7	43.6	18.1
2	T-9	关丽娟	6354996	2016-09-25			79.6	80.2	88.3						26.1
1	T-10	李东生	1001127212	2016-10-08	80.8		59.9		24	19.6					38.6
1	T-11	孙桂侠	1005045076	2016-10-10	76.9		38.1	63.2	47.8		54				45.5
1	T-12	李志	6396735	2016-10-12	65.6		58.2	24.7	23.1	18.1					49.5
2	T-13	刑宝芝	1006965018	2016-10-15			77.6	64.1	59.6	42.8					41.4
2	T-14	张春阳	6357031	2016-10-16			72.3	57.1	66.5	47					31.5
1	T-15	杜国润	6357079	2016-10-17	67		46.9	28.2	31	40.5					49.2
2	T-16	刘素珍	6357178	2016-10-17	76.8		78.1	91.9	95.8	75.3					82.9
1	T-17	曹明礼	1006427644	2016-10-21	52.8		48.9	43	34.1		41.3
1	T-18	孟庆民	3157901	2016-10-21	58.7		39.7	34.3	40.4		28.7
2	T-19	赵永芳	6418603	2016-10-24	94.1		88.9	72.4	85.3	81.8	84.1
2	T-20	王保岩(NSTEMI)	2000015211	2016-10-26	77.4		79.5	87.2	76.6	94.6	75.3				81.7
1	T-21	刘阳	1002727229	2016-10-26	67.9		50.1	50.6	69.6	48.6	49.7
	T-22	苏广君
2	T-23	张焕林	1001141010	2016-10-31	75.3		66.7	62.2	79.1		35.4
1	T-24	窦全福	1001339404	2016-11-01			52.3	47.4	27.2		30.5				49.4
1	T-25	牛贵军	1004011781	2016-11-02	81		52.1	34.6	39.5		51				42.2
1	T-26	陈克忠	1001043101	2016-11-03	80		35	21.5	20.4		22.5				37.5
1	T-27	赵海全	6402025	2016-11-06			54.5	44.3	46.9	44.9					25
2	T-28	吴龙兵	1003094516	2016-11-07				60.5	24.7	35.4	41.3(10h)				33.9
2	T-29	刘晓冬	6401802	2016-11-08	72.8		71.9	62.6	49.5		23.8
2	T-30	胡强	1002935512	2016-11-08			99.3	68.2	68.1		44.1				56.7
2	T-31	朱桂莲	1007611718	2016-11-08			63	55.5	64.7		45.7				38.9
1	T-32	刘鼎	6410845	2016-11-10	75.5		29.4	35			46
2	T-33	赵卫民	1002803016	2016-11-10	91.3		89.1	78.5	58		32.9
2	T-34	陈禹	6410799	2016-11-10	80.8		89	74.2	75.3		30.9				48.8
2	T-35	汪云佐	6407238	2016-11-14	82.5		80.3	43.7	61.2		81.2				50.5
1	T-36	杨庆文	6407350	2016-11-14	54		7.2	32.2	1.8		47.4				36
1	T-37	周文峰	6410348	2016-11-15		54.5	51.1	23.1	30.5	28.5	35.2
2	T-38	赵凤艳	6410378	2016-11-15		75.7	79.1	80	82.4		34.5					36.3
2	T-39	胡忠武	6410357	2016-11-15		80.6	73.3	45.8	25		27.8					30.8
2	T-40	李丽华	1004066601	2016-11-18	89.9		74.2	54.9	41.2	50.6	45.1				40
2	T-41	苗丰域	6400021	2016-11-19	60		77.3	41.7	36.9	44.4	48.9				51.4
1	T-42	石长垠	1004039418	2016-11-20			47.4	41.6	42	33.7	14.4
2	T-43	杨兴国	1000308212	2016-11-21	42.2		75.1	33	44.1		14.7
2	T-44	吴剑波	1000882852	2016-12-01	46.4	78.3	62.3	39.5	35.3	29.6	3.1				38.4
1	T-45	孙东涛	1000561538	2016-12-06	59.4	63	24.2	54.6	32.8	20	26.7		25.9		27.3
2	T-46	刘志友	1000092828	2016-12-07	95.6	91.5	85.4	42	28.4	19.6	23.4				22
1	T-47	齐万龙	6440816	2016-12-10	64.3	52.5	44.5	52.2	60.2	59.5	45.1		33.1		36
1	T-48	刘锡财	6442474	2016-12-21									38.8		58.2
2	T-49	刘克勤	1005635139	2016-12-23			85.7	71	59.5	58.2					87.3
1	T-50	王春来	10012174690	2016-12-25	76.5	40.2	31.1	12.6	41.7	42.2	52.3		24.8
1	T-51	薛荫双	6441627	2016-12-29	63.9	49.2	18.1	24.1	58.8		67.6		75.5		66.4
2	T-52	于德海	6441506	2016-12-30	85.8	81.4	83.6	60.8	13.8	18.4	34		59.8		21.4
2	T-53	连茂安	6331653	2016-12-31	77.6		98.6	98.3	89.4	97.9			26.4		5.2
2	T-54	孙素贤	6443616	2016-12-31	78.5	68.7	64.8	39.4	61.3	53.5	40.8		41.4		43.3
1	T-55	杨鲸威	6443439	2017-01-01	35.1	32.4	29.8	36	40.2	19.1	17.2		21.3		33.9
2	T-56	赵永亮	1002905053	2017-01-01		42.1	66.4	36.3	30.6	37.4			39.7		43.6
2	T-57	邱文华	1004485240	2017-01-03	77.3	75.3	71.5	37.4	33.9	55.6	33.1		19.4		38.9
1	T-58	张英杰	1000291221	2017-01-12	89		27.2	10.3	11.8	49	51.8
2	T-59	刘向阳	6390138	2017-01-19			64.4	50.4	43	37.2	41.9	31.4			6.9
2	T-60	祁忠祥	1002510089	2017-01-20	83.3		60.9	45.9	41.3	47.2	30.3	40.0(14h)			35.2
1	T-61	张玉兰	6389537	2017-01-23			25.7	41.8	32	40.6	83.5	29.8			48
1	T-62	杨伟春	1002831790	2017-02-03			18.3	23.8	48.2	42.8
1	T-63	张克莲	6388110	2017-02-05			48.7	51.1	45.3	44	59.9	49.3			17.1
1	T-64	郭欣荣	6580443	2017-02-09	63.3		26.4	25.3	1.3	36.7	51.9	43		33	25.6
1	T-65	于福新	6580441	2017-02-09	18.1		10.3	17.2	23.7	72.9	41.1	9.6
1	T-66	商泽斌	6579962	2017-02-12			59.3	17.3	17.1	14.1	0.8	17.2			10.1
1	T-67	白晶	6579926	2017-02-13			1.1	6.5	1.8	6.8	4.5	25.9
2	T-68	佟邵全	6579622	2017-02-14			84.9	49.1	52.7	59.9	48.9	44.5		40.5	32.6
2	T-69	王春朴	1000207114	2017-02-23			71.6	51.9	17.1	28.9	35	39.5		20.4	5
2	T-70	姚英才	6560154	2017-02-23			72.8	65.9	63.2	46.1	29.5	9.5		39	39
1	T-71	崔文平	6560142	2017-02-24			21.7	18.4	1	9.8	29.9			36.6	25.5
2	T-72	杨书义	1002033844	2017-02-26			84.3	98.3	73.2	76.6	88.2	40.6		6.8	47.2
2	T-73	赵洪祥	1006965145	2017-03-08			80.1	71	60.9	53.6	39.8				38
2	T-74	刘家来	1000079854	2017-03-09			85.7	47.9	59.8	47.8	33.7
1	T-75	王清海	1002654330	2017-03-13	98.2		49.2	10.7	6.8	3.3	61	33.6			42.4
1	T-76	晏丽英	6655386	2017-03-22	78.8		54.4	43.4	51.5	36.9	65.4	62.9			58.7
1	T-77	王庆东	6655569	2017-03-23			58.6	18.7	6.1	12.1	39.9	44			19.9
1	T-78	李策祥	1007986675	2013-03-27			57.6	50.2	39.4	28.8	37.3	42.5			23.4
1	T-79	马光忠	1006945879	2017-04-08			58.9	44.7	55.9	51.8	36.8	30.8			26.8
1	T-80	岳俊伟	6685364	2017-04-08			20.8	30.7	37.1	41.6	14.5	67.4			9
1	T-81	于忠民	1000606390	2017-04-20	79.5		49.3	49.6	53	64.1	46.7	55.6			45.2
2	T-82	李晶杰	6801241	2017-04-28	95.3		88.6	81.9	60.3	71.6	57.2	61.5			52.6
1	T-83	李贺文	6800736	2017-05-02	69.4		14	22.2	1.5	6.4	8.2	0.6			6.8
1	T-84	吕连贵	1005038246	2017-05-21			13.5	16.8	23.3	0.9	27.9	20.3			8.5
1	T-85	尚德玉	1002317526	2017-05-21			57.2	33.2	40.8	28.8	20.4	55.6			15.4
1	T-86	李宝玉	1001908348	2017-05-23			31.7	9.4	17.5	16.8				0.8
1	T-87	马吉斌	1004997590	2017-05-23			21.2	20.7	17.8	15	13.1			17.4	10.7
1	T-88	鞠洪水	1000449914	2017-05-25			38.3	23.1	9.4	32.7	60.7			11.7	33.2
1	T-89	张义军	1005015686	2017-05-31			0.2	50.6	45.6	39.5	38.7			29.9	1.1
1	T-90	李延富	6972657	2017-08-28	87.5			37	10.8	0.6	0.8				31.9
2	T-91	池元杰	1000082048	2017-08-29			60.6		40.3	45.8	1.5				1.2
2	T-92	王新华	1003069624	2017-08-29	54.8		75.9	78.5	10.7	78.6	81.1				76.1
1	T-93	韩晓峰	1002589425	2017-08-30	29.2		50.2	70.6	55.2	49.6	2.6
1	T-94	焦向儒	6973101	2017-09-02			28.1	7.5	40.7	33.6	56.6				26.3
1	T-95	白秀义	1007284786	2017-09-02			28.8	10.7	28.8	34.9	32.6				19
2	T-96	简连财	6973437	2017-09-05			73.5	73.9	47.7	54.1					57.8
1	T-97	孟繁安	LN00050995	2017-09-07			49.9	21.1	2	1.6					1
1	T-98	白绍武	1002403105	2017-09-08				38.6	27.2	15.2	25.1(10h)
2	T-99	王国臣	7014826	2017-09-14			81.4	95	89.5	93.6	97.3				86.7
1	T-100	姚兵	2000041687	2017-09-27	92.3		48.4	63.4	45.9	55.5
1	T-101	赵国权	7011118	2017-10-02			2.2	8.2	1.4
2	T-102	李绍芬	1002485151	2017-10-04			93	86.4	76
2	T-103	姜凤云	7080741	2017-10-12			81.2	46.6	17.6
2	T-104	白国林	7081210	2017-10-15			65.4	19.3	34.5
2	T-105	王宝振	1000778762	2017-10-15			92.1	88	74.2
2	T-106	郭佩琪	1002092214	2017-10-31	89.7		85.9	24.6	3.5	24.7	14.3(10h)				23.3
1	T-107	李洪安	70805927	2017-11-02			13.3	1.3	1
1	T-108	郝明志	1004360573	2017-11-07			36	32.4	34.2
1	T-109	赵德臣	7077115	2017-11-12			17.1	30.8	22.9	2
1	T-110	谭树胜	7174388	2017-11-16			15.4	21.3	3.5
2	T-111	马金发	7174645	2017-11-17			93.8	1.2	1	1.1
1	T-112	王春平	1004371305	2017-11-21			21	12.8
1	T-113	王明富	7174052	2017-11-22			1.4	6.5	2.1	56.9	16.1
2	T-114	王化成	7173894	2017-11-24			85.2	19.1	24.3	25.1
2	T-115	李明余	1007921047	2017-11-25			94	63	16.4	10					14.3
2	T-116	邹本树	7177534	2017-11-29			72.5	34.5	60.2
2	T-117	刘德生	7177141	2017-12-02			73.9	28.2	25.6
2	T-118	张新奇	1001242612	2017-12-09			73.5	73.8	17.6		21.6
1	T-119	朴明俊	7131618	2017-12-13			1	1			1.8				18.4
1	T-120	孙国彬	7131860	2017-12-13			15.8	23.6	13.8	16.9
2	T-121	李恒	1003973116	2017-12-17			71.4	23.9	28.8
2	T-122	齐昌艳	7134905	2017-12-18			72.9	38	35.2	37.3
1	T-123	戎柏	7134891	2017-12-18			32	28.1	36.7	2.3
2	T-124	刘桂杰	1003919115	2017-12-19			63.9	4.7	5.3		1.2				14.8
1	T-125	金平	7252095	2017-12-20	79		14.7	14.6	5.4	8					2.5
2	T-126	郝朝忠	7252147	2017-12-20	77.5		94.1	64.5	22.3	11.6					10.9
1	T-127	张丽华	1006010597	2017-12-21	99.5		12.4	1.9	2.9	11					20.8
2	T-128	殷会霞	7252431	2017-12-25	96.4		82.5	33.9	10	1					0.3
1	T-129	赵文阳	7253098	2017-12-29	14.2		10.4	22.1	29.1	30.7					30.8
2	T-130	史静菊	7253054	2017-12-29	74.8		82.1	72	67	75.5					48.6
1	T-131	侯德林	7253397	2017-12-31			19.6
1	T-132	佟波	1008540016	2017-12-29			18.8
1	T-133	高崑	1004291322	2018-01-05	69.1		13.6	14.3	30.7	9.1					18.7
2	T-134	徐利	1005203951	2018-01-07	83.4		60.5	13.8	1	10.5
1	T-135	郭振海	1002057479	2018-01-12			35.7
1	T-136	李振海	7251303	2018-01-14			35.4
1	T-137	马清沂	1000750574	2018-01-15			34.9
1	T-138	程淑云	7250784	2018-01-18	98.9		20.8	14.2	1	27.2	22.1				44.4
1	T-139	孙宝国	7313232	2018-01-19			26.1	3.2	1.6
1	T-140	李阳	1002867514	2018-01-22	57.9		11.3	10.3	13.8						26.2
1	T-141	王德秋	100222231	2018-01-22	95.5		36	3	37.5						41.4
1	T-142	张志金	7312658	2018-01-25	86.4		54	49.2	37
2	T-143	邢宝云	7241143	2018-02-01			87.1	22.2	43.4	28
2	T-144	王永军	7313069	2018-02-02			78.1	82.2	64.9

## Sheet: Sheet2
	0	2	4	6	8	12	24
NPR	68.3	23.8	38.4	34.2
	56.4	52.8	16.9	27.4
	70.5	62.8	52.2	14.7
	69.3	40.9	5.1	28.5
	89.1	23.4	14.6	18.9
	86.5	1.7	1	未检出
	72.4	36.1	19.3	61.4
	48.6	9.4	18.7	15.3
	81.7	45.5	17.8	4.4
	65.8	29.2	40.5	57.2
	79.2	31.1	30.3	8.5
	64.7	36.1	24.6	23.6
	79.1	31.1	12.2	6.7
	60.5	47.6	30.5	22.5
	84.3	未检出	25.8	39.7
	66.9	62.5	60.6	8.9
	75.5	32.5	未检出	45.3
	82.5	46.3	57.1	26.3
	91.1	71.9	45.7	51.8
	88.2	69.2	22.3	20.8
	55.8	39	34.3	19.6
	89.4	71.9	14.4	31.6
	70.3	41	36.1	67.4
	29.3	23.7	1.4	24.2
	80	52.6	30.5	18.5
	75.6	41.8	26.9	16.9
	72.2	36.1	19.5	25.7
	48.8	51.4	42.2	11.9
	94.1	11.6	12.6	15.7
	97.4	28.1	29.5	未检出
	66.9	36.5	57	27.4
	60.7	55.2	49.6	15.8
	91.4	60.8	30.7	24.3
	85.3	30.6	60.2	41.3
	65.1	48.6	54.2	49.3
	85.9	71.6	57.7	72.4
	70.7	6.9	6.5	59.4
	75.6	38.2	31.2	32.7
	50.4	24.7	27.2	21.6
	94.2	47.9	33	14.8
	98.5	17.6	27.3	18.5
	28.6	21.7	33.3	47.4
	74.7	30.9	66.5	53.8
	87.4	9.6	29.3	33.7
	69.6	24.1	66.5	24.5
	75.1	16.7	53.5	28.4
	59.2	25	23.2	11.8
	87.5	12.2	27.7	16.3
	69.5	44.7	44.2	40.4
	75.2	37.5	35.5	63.7
	89.6	14	46	5.3
	75.2	53.9	28	19.5
	70.4	54.8	30.6	40.8
	56.4	25.6	1	36.5
	83.1	54	16.7	26.1
	68.9	37.5	50.8	44.5
	89.7	21.3	13.1	4.8
	81.5	58	45.1	26.3
	76.4	1.6	13.7	22.2
	64.4	30.2	20.9	30.5
	88	50.7	26.4	13.4
	85.2	52.9	36.9	24.9
	85.1	36.2	31.6	43.5
	70.2	18.1	38.8	40.8
	84.5	23.5	20.3	35.1
	91.9	43.3	31	61.5
	21.9	69.6	56.2	58.8
	37.1	40.7	28.6	13.6
	70.6	33.6	34.1	20.2
	98.6	53.7	31.4	61.2
	91.9	14.6	31.5	39.4
	56.5	36.5	15.4	52.2
	88.4	30.2	45.5	36.7
	92.9	36.3	28.9	33.5
	77.3	43.9	12.9	21.3
	93.5	37.2	42.1	12
	46.5	42.5	36.9	50.2
	84.3	38.7	6.4	29.1
	68.3	11.5	9.2	3.9
	83.5	3	1.3	33.5
	88.2	34.3	19.7	24
	95.3	19.4	11.3	2.1
	58.1	28.7	20.1	35.1
	80.6	39.5	33.1	17.8
	79.3	15.1	13.8	3.9
	68.4	34.3	23	34
	80.5	29	44	29.1
	94.5	31.4	15.9	32.1
	31.3	56.5	31.4	37.8
	80.6	30.9	39.8	30
	65.2	6	28.4	25.3
	85.1	35.7	37.9	24.2
	37	16.6	28	33.3
	97.2	39.4	50.2	38.2
	89.1	38.4	36	26.5
	70.3	52.3	40.2	58.3
	16.5	27.7	22.5	15.8
	24.2	41.2	43.1	72.4
	35.9	18.9	29.9	13
	90.8	35.9	26.9	32.6
	73.049	35.4636	30.5232	30.3255
	18.6079	16.6157	15.2862	16.7075
