# Supplementary material for: Gut microbiota induces high platelet response in patients with ST segment elevation myocardial infarction after ticagrelor treatment
Source: eLife. 2022 Mar 8;11:e70240. doi: 10.7554/eLife.70240 (PMC8903831; doi:10.7554/eLife.70240)
Supplement: Figure 1—source data 3. [file elife-70240-fig1-data3.xlsx]

## Sheet: Sheet1
		代谢物浓度
			0h	1h	2h	4h	6h	8h	12h	24h	36h	48h	72h
1	A-05	刘兴利	0+C3:D78.121		13.9	15.1
1	A-06	王静	0		98.8	91.4
1	A-13	郭忠民	2.55		106	97.4
1	A-14	傅秀云	0		4.81	211
1	A-15	刘英凯	0.0714		2.57	3.32		29.9
1	A-17	张宗哲	0.0912		2.01	42.3		41.5
1	A-35	杨义新	1.49		154	97.5	81.8		167
1	A-37	刘忠沪	0.116		241	181	171			160
1	A-40	李军	0.22		135	23.3				108
1	A-41	付永年	0.161		90.1	93.7				96
1	A-42	吴作卿	0.124		0.236	0.571	1.42		3.41
1	A-49	佐常英	0.0946		115	185	156
1	A-51	邱宝东	14.1		252	253
1	A-54	王珍珠	0.307		92.1	140	128
1	A-55	许元抚	0.186		2.48	17.7	42
1	A-57	王涛	0.233		115	108	91.8	87.3	71.9	77.6
1	A-58	刘廷胜	0.329		21	40.6
1	A-59	刘成信	0.2		78.3	112	128	86.4	72.1
1	A-60	高波	0.143		25.4	63.1	61.4	64.2	73.7	68.9
1	A-63	雷灵	0.122		198	158	92.6	79.5	52.3	58.7
1	A-64	李振元	0		103	42.3	38.8	30.4	22.2	80.2
1	A-65	姜文贤	0		9.73	133	86.7	47.8	29.4
1	A-69	李久臣	0		53.3	58.2	57.9	51.1	58.8
1	A-70	薛桂枝	0		28.7	43.8	37.7	23.9	14.4	0.957
1	A-71	马德才	0		249	186	139	75.1	70.3	39.2
1	A-74	张恩辉	0		54.3	43.1	32.3	25.4	26.9
1	A-80	刘跃斌	0		111	115	64.3			31.6
1	A-82	孙传辉	0		40.2	147	89.3		35.8	6.06
1	A-83	王连生	<0		3.18	47.6	36.6	27.8	23.8
1	A-85	段兴权	<0		129	197	130	105	88.5	138
1	A-88	邵光	<0		20.4	19.5	23.2	36.2	42(38)
1	A-89	冮毅	<0		35.2	56.4	52.4	67.2	74.2(58.5)
1	A-91	李秀凤	no peak		26.7	101	141	176	116
1	A-92	李守民	<0		7.15	26.5	46	30.8	26.1
1	A-93	陈森	<0		7.38	10.2	9.95	30.2
1	A-94	郭庆华	<0		<0	2.48	25.2	20.9		10.8
1	A-95	张玉珍	<0		47.1	65.4	54.2	39.6		26.8
1	A-97	方贺营	<0		39.6	20.1	24.6	27.4	27.5	55.9
1	A-99	张林	<0		<0	3.31	12.5		61.2		53.4
1	T-03	孙俊余	<0		9.33	21.5	19.1		21.2		21.2		12.1
1	T-07	陶纯宝	0.62		109	99.9	65.5
1	T-08	王东栋	0.606		5.26	23.3	18.7					101
1	T-10	李东生	0.642		2.47	0	100	84.1	139	110	104	105
1	T-11	孙桂侠	0.639		22.3	146	161	126	78.6	43.5		13.1
1	T-12	李志	0.598		4.32	13.1	29	40.4	59.4	72.9		71
1	T-15	杜国润	0.624		78.4	66	56.1	49.4	35.1	19.1	15.2
1	T-17	曹明礼	0.607		28	40.8	47.9	45.3	44.6
1	T-18	孟庆民	0.605		10.2	30.9	22.7	29.1	28.2	60.9
1	T-21	刘阳	no peak		73.2	67.6	45.8	34.2	34		51.5
1	T-24	窦全福	<0		3.36	4.88	20.7	49.6	60.3	76.1
1	T-25	牛贵军	<0		16	33.7	27.9	32.6	31	13.6
1	T-26	陈克忠	<0		22.5	53.7	55.8	38	31.6			34.6
1	T-27	赵海全	no peak		25.4	29.8	21.5	33.5	48.5	55.4		46.6
1	T-32	刘鼎	0.97		102	108	81.2		46.1
1	T-36	杨庆文	0.978		29.7	37.7	61.7	41.5	32	35.6
1	T-37	周文峰	no peak	19	72.3	74.7	0.981	36.3	22
1	T-42	石长垠	no peak		22.2	76.2	89.4	78.2	50.1
2	A-11	张德安	0		0	0.937
2	A-12	朱庆俊	0		0	0.0991
2	A-16	王思元	0.107		94.7	65.7		50
2	A-18	郎恩沛	0		0.339	2.26
2	A-19	邵辉	0.0346		1.98	12.8		19.8
2	A-20	陈政显	0.0555		0.6	2.47		43.9
2	A-22	王晖	0.0749		48.2	1.04		45.3
2	A-24	吴永明	0.0715		5.76	74.9		52.3
2	A-33	史雪峰	0.124		0.273	162	149			99.5
2	A-34	王德俊	0.0477		0.114	11.3	14.9		35	163
2	A-36	杨玉英	0.193		1.41	4.27	10
2	A-43	郭世忠	5.35		11.3	18	21.3
2	A-45	于国忠	0.102		2.13	2.09
2	A-46	武新柱	0.132		2.18	35	17.1
2	A-47	刘国伟	0.214		1.45	12.8
2	A-48	王刚	0.163		0.638	3.6
2	A-50	郑国连	0.1		1.48	50.3	72.8
2	A-53	路绵海	0.232		2.2	36.6	83.9
2	A-56	刘平	0.291		7.44	13.9	23.5	19.3	23.4	295
2	A-61	田英	0.137		0.172	0.134	18.5	44	86.7	113
2	A-62	李明玉	0.0833		2.62	44.9	56.2	97.9	143	79.6
2	A-66	李坤德	0		9.93	10.7	82.4	50.1	33.3
2	A-67	卜宝军	0		4.43	0	4.47	8.88	19
2	A-68	宁艳平			5.25	10.1	38.2	20.7	11.6	1.51
2	A-72	郝先超	0		0	0.0968	11.6	11.5	32.4	30.6
2	A-73	刘维昆	0		0	0	1.64	1.07	1.86
2	A-75	马勤礼	0		2.78	18.6	11.3
2	A-76	孙秀华	0		4.14	4.4		13.7	13.5	9.64
2	A-77	李克明	0		0	0	0			39.1
2	A-81	伊魁元	0		2.93	48.9	47.8		95.3	31
2	A-84	龚庆朋	<0		<0	0.229	29.1	74	71.5
2	A-86	王玉竹	<0		1.16	13.7	43.1	62.6	152	89.5
2	A-87	朱秀珍	<0		0.0339	4.21	23.3	29.2
2	A-90	王彦	<0		<0	0.36	0.956	1.32	3.49
2	A-96	谭建华	<0		5.44	15.1	28.5	36.1	50.9	26.3	28.1
2	A-98	郑国祥	<0		<0	1.12	2.05	5	9.25
2	A-100	王铁军	<0		1.55	2.09	4.27	5.04	2.58	19.1	32.7	33.8	54.8
2	T-01	涂成芳	<0		<0	1.04	8.69		34.9	107	106	35.8
2	T-02	施振清	no peak		<0	1.74	46		54.6		33.2
2	T-04	程玉珍	0.601		1.33	15.7	26.2
2	T-05	姚彬	0.631		0.632	11.3	42.9	161	68.2	118
2	T-06	王维芬	no peak		1.33	3.18	11.6			202		0.6
2	T-09	关丽娟	0.608		1.15	1.35	3.56			75.3		99.5
2	T-13	刑宝芝	0.661		0.703	10.5	23.4	40.8		39.6
2	T-14	张春阳	0.627		0.911	1.23	3.67	6.14		23.7
2	T-16	刘素珍	0.595		0.77	0.887	1.02	0.809	0.677	0.681	0.61
2	T-19	赵永芳	<0		<0	20	15.5	20.9	30.9
2	T-20	王保岩	<0		<0	no peak	<0	no peak	<0	<0
2	T-23	张焕林	<0		0.657	7.71	9.92	9.3	12.5			20.7
2	T-28	吴龙兵	0.431			4.19	31.3	21.1	21.7	45.3
2	T-29	刘晓冬	<0		0.31	3.03	17	33.5	100	56.3		118
2	T-30	胡强	<0		0.121	9.7	15.1		23.9	44.8		48.7
2	T-31	朱桂莲	no peak		95	194	97.3		44.6	46.2
2	T-33	赵卫民	0.974		1.02	1.61	10		52.6
2	T-34	陈禹	no peak		1.7	1.32	4.96	4.74	98	88.7
2	T-35	汪云佐	no peak		7.62	17	15.3	10.3	12.2
2	T-38	赵凤艳	no peak	1.05	2.29	2.3	26.9		34			40.6
2	T-39	胡忠武	0.982	0.988	1.7	12.9	3.62		70.6			133
2	T-40	李丽华	no peak		54.4	38.1	62.8	56	86.4	127
2	T-41	苗丰域	0.974	0.98	1.18	70.6	45	33.8	42	30.7

## Sheet: Sheet2
			0h	2h	4h	6h	8h	12h	24h					0h	2h	4h	6h	8h	12h	24h
1	A-05	刘兴利	0+C3:D78.121	13.9	15.1						2	A-11	张德安			0.937
1	A-06	王静	0	98.8	91.4						2	A-12	朱庆俊			0.0991
1	A-13	郭忠民	2.55	106	97.4						2	A-16	王思元	0.107	24.7	65.7		50
1	A-14	傅秀云	0	4.81	211						2	A-18	郎恩沛	0	33.9	72.6
1	A-15	刘英凯	0.0714	2.57	3.32		29.9				2	A-19	邵辉	0.0346	1.98	12.8		19.8
1	A-17	张宗哲	0.0912	2.01	42.3		41.5				2	A-20	陈政显	0.0555	20.6	42.7		43.9
1	A-35	杨义新	1.49	154	97.5	81.8		167			2	A-22	王晖	0.0749	48.2	104		45.3
1	A-37	刘忠沪	0.116	241	181	171			160		2	A-24	吴永明	0.0715	57.6	74.9		52.3
1	A-40	李军	0.22	135	23.3				108		2	A-33	史雪峰	0.124	73	162	149			99.5
1	A-41	付永年	0.161	90.1	93.7				96		2	A-34	王德俊	0.0477	0.114	11.3	14.9		35	163
1	A-42	吴作卿	0.124	0.236	0.571	1.42		3.41			2	A-36	杨玉英	0.193	14.1	42.7	108
1	A-49	佐常英	0.0946	115	185	156					2	A-43	郭世忠	5.35	11.3	18	21.3
1	A-51	邱宝东	14.1	252	253						2	A-45	于国忠	0.102	2.13	2.09
1	A-54	王珍珠	0.307	92.1	140	128					2	A-46	武新柱	0.132	22.18	35	17.1
1	A-55	许元抚	0.186	2.48	17.7	42					2	A-47	刘国伟	0.214	1.45	12.8
1	A-57	王涛	0.233	115	108	91.8	87.3	71.9	77.6		2	A-48	王刚	0.163	41.8	63.6
1	A-58	刘廷胜	0.329	21	40.6						2	A-50	郑国连	0.1	31.48	50.3	72.8
1	A-59	刘成信	0.2	78.3	112	128	86.4	72.1			2	A-53	路绵海	0.232	32.2	36.6	83.9
1	A-60	高波	0.143	25.4	63.1	61.4	64.2	73.7	68.9		2	A-56	刘平	0.291	7.44	13.9	23.5	19.3	23.4	295
1	A-63	雷灵	0.122	198	158	92.6	79.5	52.3	58.7		2	A-61	田英	0.137	7.2	13.4	18.5	44	86.7	113
1	A-64	李振元	0	103	42.3	38.8	30.4	22.2	80.2		2	A-62	李明玉	0.0833	22.62	44.9	56.2	97.9	143	79.6
1	A-65	姜文贤	0	9.73	133	86.7	47.8	29.4			2	A-66	李坤德	0	9.93	10.7	82.4	50.1	33.3
1	A-69	李久臣	0	53.3	58.2	57.9	51.1	58.8			2	A-67	卜宝军	0	4.43	0	4.47	8.88	19
1	A-70	薛桂枝	0	28.7	43.8	37.7	23.9	14.4	0.957		2	A-68	宁艳平		5.25	10.1	38.2	20.7	11.6	1.51
1	A-71	马德才	0	249	186	139	75.1	70.3	39.2		2	A-72	郝先超	0	0		11.6	11.5	32.4	30.6
1	A-74	张恩辉	0	54.3	43.1	32.3	25.4	26.9			2	A-73	刘维昆	0	0	0	1.64	1.07	1.86
1	A-80	刘跃斌	0	111	115	64.3			31.6		2	A-75	马勤礼	0	2.78	18.6	11.3
1	A-82	孙传辉	0	40.2	147	89.3		35.8	6.06		2	A-76	孙秀华	0	4.14	4.4		13.7	13.5	9.64
1	A-83	王连生	<0	3.18	47.6	36.6	27.8	23.8			2	A-77	李克明	0	0	0	0			39.1
1	A-85	段兴权	<0	129	197	130	105	88.5	138		2	A-81	伊魁元	0	29.3	48.9	47.8		95.3	31
1	A-88	邵光	<0	20.4	19.5	23.2	36.2	42(38)			2	A-84	龚庆朋	<0	<0	0.229	29.1	74	71.5
1	A-89	冮毅	<0	35.2	56.4	52.4	67.2	74.2(58.5)			2	A-86	王玉竹	<0	1.16	13.7	43.1	62.6	152	89.5
1	A-91	李秀凤	no peak	26.7	101	141	176	116			2	A-87	朱秀珍	<0	0.0339	4.21	23.3	29.2
1	A-92	李守民	<0	7.15	26.5	46	30.8	26.1			2	A-90	王彦	<0	<0	0.36	0.956	1.32	3.49
1	A-93	陈森	<0	7.38	10.2	9.95	30.2				2	A-96	谭建华	<0	5.44	15.1	28.5	36.1	50.9	26.3
1	A-94	郭庆华	<0	<0	2.48	25.2	20.9		10.8		2	A-98	郑国祥	<0	<0	1.12	2.05	5	9.25
1	A-95	张玉珍	<0	47.1	65.4	54.2	39.6		26.8		2	A-100	王铁军	<0	1.55	2.09	4.27	5.04	2.58	19.1
1	A-97	方贺营	<0	39.6	20.1	24.6	27.4	27.5	55.9		2	T-01	涂成芳	<0	<0	1.04	8.69		34.9	107
1	A-99	张林	<0	<0	3.31	12.5		61.2			2	T-02	施振清	no peak	<0	1.74	46		54.6
1	T-03	孙俊余	<0	9.33	21.5	19.1		21.2			2	T-04	程玉珍	0.601	1.33	15.7	26.2
1	T-07	陶纯宝	0.62	109	99.9	65.5					2	T-05	姚彬	0.631	6.32	11.3	42.9	161	68.2	118
1	T-08	王东栋	0.606	5.26	23.3	18.7					2	T-06	王维芬	no peak	1.33	3.18	11.6			202
1	T-10	李东生	0.642	2.47	0	100	84.1	139	110		2	T-09	关丽娟	0.608	1.15	1.35	3.56			75.3
1	T-11	孙桂侠	0.639	22.3	146	161	126	78.6	43.5		2	T-13	刑宝芝	0.661	7.03	10.5	23.4	40.8		39.6
1	T-12	李志	0.598	4.32	13.1	29	40.4	59.4	72.9		2	T-14	张春阳	0.627	0.911	1.23	3.67	6.14		23.7
1	T-15	杜国润	0.624	78.4	66	56.1	49.4	35.1	19.1		2	T-16	刘素珍	0.595	0.77	0.887	1.02	0.809	0.677	0.681
1	T-17	曹明礼	0.607	28	40.8	47.9	45.3	44.6			2	T-19	赵永芳	<0	<0	20	15.5	20.9	30.9
1	T-18	孟庆民	0.605	10.2	30.9	22.7	29.1	28.2	60.9		2	T-20	王保岩	<0	<0	no peak	<0	no peak	<0	<0
1	T-21	刘阳	no peak	73.2	67.6	45.8	34.2	34			2	T-23	张焕林	<0	6.57	7.71	9.92	9.3	12.5
1	T-24	窦全福	<0	3.36	4.88	20.7	49.6	60.3	76.1		2	T-28	吴龙兵	0.431		4.19	31.3	21.1	21.7	45.3
1	T-25	牛贵军	<0	16	33.7	27.9	32.6	31	13.6		2	T-29	刘晓冬	<0	0.31	3.03	17	33.5	100	56.3
1	T-26	陈克忠	<0	22.5	53.7	55.8	38	31.6			2	T-30	胡强	<0	6.21	9.7	15.1		23.9	44.8
1	T-27	赵海全	no peak	25.4	29.8	21.5	33.5	48.5	55.4		2	T-31	朱桂莲	no peak	49.5	79.4	97.3		44.6	46.2
1	T-32	刘鼎	0.97	102	108	81.2		46.1			2	T-33	赵卫民	0.974	1.02	1.61	10		52.6
1	T-36	杨庆文	0.978	29.7	37.7	61.7	41.5	32	35.6		2	T-34	陈禹	no peak	1.7	1.32	4.96	4.74	98	88.7
1	T-37	周文峰	no peak	72.3	74.7	0.981	36.3	22			2	T-35	汪云佐	no peak	7.62	17	15.3	10.3	12.2
1	T-42	石长垠	no peak	22.2	76.2	89.4	78.2	50.1			2	T-38	赵凤艳	no peak	2.29	2.3	26.9		34
											2	T-39	胡忠武	0.982	31.7	12.9	3.62		70.6
											2	T-40	李丽华	no peak	24.4	38.1	62.8	56	86.4	127
											2	T-41	苗丰域	0.974	31.18	70.6	45	33.8	42	30.7
			0.741276	60.8834	73.3274	63.4181	53.3833	51.5146	60.2424					0.3945	13.987	22.8383	30.1197	33.0333	46.2517	74.153
			2.31327	65.2426	61.5688	45.1489	32.8545	34.8533	41.3347					0.891012	17.4524	31.2504	32.0608	32.86	39.2044	66.5072
			0.397641	3.25035e-06	1.83316e-07	8.19787e-05	0.0124023	0.557345	0.381218
