# Supplementary material for: Gut microbiota induces high platelet response in patients with ST segment elevation myocardial infarction after ticagrelor treatment
Source: eLife. 2022 Mar 8;11:e70240. doi: 10.7554/eLife.70240 (PMC8903831; doi:10.7554/eLife.70240)
Supplement: Figure 1—source data 4. [file elife-70240-fig1-data4.xlsx]

## Sheet: Sheet1
住院期间MACE(心源性死亡、心衰、再梗、卒中)	分组(1=正常反应组；2=延迟反应组)	备注	HISID	入院日期	住院时间(d)	编号	病人姓名	年龄(岁)	性别(女=1，男=0)	体重(kg)	近期吸烟史(吸烟=1，不吸烟=0)	高血压病病史	糖尿病病史	卒中 病史	MI病史	PCI史	既往CABG史	白细胞计数(109/L)	血小板计数(109/L)	血红蛋白(g/L)	总胆固醇(mmol/L)	甘油三酯(mmol/L)	高密度脂蛋白(mmol/L)	低密度脂蛋白(mmol/L)	总胆红素(umol/L)	尿素(mmol/L)	血清肌酐(umol/L)	尿酸(umol/L)	胱抑素C(mg/L)	空腹血糖(mmol/L)	糖化血红蛋白	阿司匹林	他汀类	ACEI类	β阻滞剂	硝酸酯类	PPI	利尿剂	醛固酮抑制剂	胰岛素	降糖药	钙通道拮抗剂
	2	NSTEMI				A-1	关昌华
	1		6034263	2016-03-30	9	A-2	王景玉	49	0	80	1	0	0	0	0	0	0	8.8	257	139	4.44	1.46	0.83	2.89	19.3	4.51	67.06		0.89	5.07		1	1	1	1	0	1	0	0	0	0	0
	2		6033897	2016-04-02	5	A-3	黄雅珍	73	1	50	0	0	1	1	0	0	0	10.3	268	115	6.37	3.21	0.79	4.03	5.4	6.93	95.13		1.41	16.77	10.8	1	1	1	1	0	1	0	0	0	0	0
	2	术后1h替罗非班.2016-05-05CABG	1002961513	2016-04-16	9	A-4	宋洪财	57	0	80	1	1	0	0	0	0	0	12.7	151	170	4.23	2.17	0.91	2.42	23.1	5.86	62.1		0.96	5.71		1	1	1	1	0	1	0	0	0	0	0
	1		1001045444	2016-04-22	7	A-5	刘兴利	52	0		0	1	0	0	0	0	0	11.8	264	150	5.9	6.76	0.89	3.07	8.4	9.43	58.87	329	0.74	7.39		1	1	0	1	1	1	1	1	0	0	0
	1		ST11116009	2016-04-28	6	A-6	王静	60	0		0	0	1	0	0	0	0	19.4	256	165	5.19	0.96	1.17	3.14	17.2	5.95	52.4		0.76	8.48	7.7	1	1	1	1	0	1	0	0	0	0	0
	1		1000473770	2016-04-29	6	A-7	于海	52	0	80	1	0	1	0	0	0	0	6.9	204	165	5.93	3.67	0.86	3.64	12.5	5.53	74.97		1.03	18.19		1	1	1	1	0	1	0	0	0	0	0
	1		1000075161	2016-04-30	6	A-8	翁立伟	48	0		1	0	0	0	0	0	0	8.6	308	141	5.91	2.8	0.7	3.49	9.3	3.63	79.86	339	0.94	5.29		1	1	1	1	1	0	1	1	0	0	0
	1		ST11054828	2016-04-30	11	A-9	杨聪明	53	0	64	0	0	0	0	0	0	0	12.1	192	136	5.98	1.06	1.08	3.59	19.3	5.92	70.15	275	0.61	5.83		1	1	1	1	1	1	0	0	0	0	0
	1		5996007	2016-04-30	7	A-10	张井山	59	0	75	0	1	0	0	0	0	0	10.4	270	119	3.42	2.03	0.64	1.92	11	7.97	64.16		0.91	7.39		1	1	1	1	0	1	0	0	0	0	0
	2	术后2h替罗非班	5998181	2016-05-02	33	A-11	张德安	51	0		1	1	0	0	0	0	0	7.6	178	111	4.62	1.88	1.11	2.53	13.3	3.63	71.85		0.69	6.7		1	1	1	1	1	1	0	0	0	0	0
	2	满族、糖尿病视网膜病变	5998132	2016-05-03	10	A-12	朱庆俊	57	0	80	1	1	1	0	0	0	0	19.1	325	155	4.98	1.09	0.85	3.11	12.8	6.72	63.29		0.89	11.05		1	1	1	0	0	0	0	0	1	0	0
	1		1004254813	2016-05-03	7	A-13	郭忠民	52	0	60	1	0	0	0	0	0	0	11.1	238	154	4.34	1.2	1.22	2.22	18.5	4.17	77.7		0.87	4.57		1	1	0	0	0	0	0	0	0	0	0
	1		1001941842	2016-05-03	3	A-14	傅秀云	71	1	55	1	0	1	0	0	0	0	9	206	132	6.69	4.47	1	4.09	22.5	4.09	46.97	282	0.72	10.12	10.3	1	1	1	0	0	1	0	0	0	1	0
	1	NSTEMI	1002056924	2016-05-05	8	A-15	刘英凯	52	0		1	1	0	1	1	0	0	8.9	226	163	5.5	6.38	0.77	3.26	8.8	7	67.45		0.91	5.87		1	1	1	1	0	1	1	1	0	0	0
	2		5997797	2016-05-06	9	A-16	王思元	65	0	69	0	1	0	0	0	0	0	11.9	188	140	4.12	0.61	1.06	2.38	15.6	5.47	58.19		0.71	5.5		1	1	1	1	0	1	0	0	0	0	0
	1		1004000754	2016-05-05	4	A-17	张宗哲	50	0	74	1	1	0	0	0	0	0	11.2	249	151	6.55	1.5	0.99	4.21	9.6	5.04	81.85		1.01	5.85		1	1	1	1	1	1	0	0	0	0	0
	2	术后8h替罗非班	1005778906	2016-05-06	6	A-18	郎恩沛	61	0	70	1	1	0	0	0	0	0	13.6	211	131	4.78	1.89	0.83	2.9	17.3	5.11	79.9					1	1	1	1	1	1	0	0	0	0	0
	2		1000479537	2016-05-08	8	A-19	邵辉	45	0	86	1	1	0	0	0	0	0	13.3	158	149					8.2	5.19	95.69		1.06			1	1	1	1	1	1	1	0	0	0	0
	2		5997376	2016-05-08	9	A-20	陈政显	72	0	80	0	1	0	0	1	0	0	11.7	188	147	3.91	0.75	0.75	2.52	25	8.52	87.67		0.87	7.73	5.8	1	1	1	0	0	0	0	0	0	0	0
	1	肾结核	5997375	2016-05-08	8	A-21	赵世荣	63	0		1	0	0	0	0	0	0	8.8	190	131	4.3	1.74	0.81	2.63	9.2	6.91	96.85		1.08	11.87		1	1	1	1	0	0	0	0	0	0	0
	2	肝炎病史	1003921772	2016-05-09	7	A-22	王晖	62	0		1	1	1	1	1	1	0	12.6	99	147	3.92	0.72	0.87	2.35	16.7	9.48	94.56		1.13	12.11		1	1	0	0	0	1	0	0	1	0	0
	2	2016-06-30心包积液(中-大量)	5997225	2016-05-10	10	A-23	郭玉恩	60	0	80	0	0	0	0	0	0	0	11.5	157	138	4.65	3.87	0.74	2.77	12.5	6.47	79.62		0.63	6.39		1	1	0	1	1	1	1	0	0	0	0
	2	替罗非班术中用	ST33014903	2016-05-11	9	A-24	吴永明	51	0	76	1	1	0	0	1	0	0	14.1	279	136	6.39	2.37	0.91	4.08	16.3	5.3	78.65		0.83	5.46		1	1	1	0	1	0	0	0	0	0	0
	1		1006383882	2016-05-11	4	A-25	程朝阳	44	0	75	1	1	0	0	0	0	0	12.1	238	146	6.38	2.12	0.89	4.23	15.3	5.73	79.14		0.58	6.43		1	1	1	1	0	1	0	0	0	0	0
	1	替罗非班、吗啡术中用	1001045644	2016-05-12		A-26	孟广毅	61	0	70	1	0	0	0	0	0	0	8.8	252	154	3.71	1.21	0.76	2.16	17.7	3.32	64.77			6.22		1	1	1	1	0	1	0	0
	1	2016-07-05PCI-RCA-PL	1007370434	2016-05-15	5	A-27	张晨光	33	0	92	1	0	0	0	0	0	0	12.4	249	161	4.82	4.47	0.64	3.14	21	2.88	60.87		0.89	6.06		1	1	0	0	0	1	0	0	0	0	0
	2		5948318	2016-05-17	13	A-28	金凤艳	60	1		0	0	0	0	0	0	0	9.3	166	117	4.57	3.27	0.9	2.67	8.6	5.64	58.07		1.03	5.16		1	1	1	0	1	1	1	1	0	0	0
	1		1003721080	2016-05-18	5	A-29	王文敏	76	0		1	0	0	0	0	0	0	15.7	237	155	5.94	0.82	1.19	4.04	21.7	5.04	78.51		1.4	6.21		1	1	1	1	0	1	0	0	0	0	1
	2	术后1h替罗非班	1007082045	2016-05-18	9	A-30	阚魁武	30	0	65	1	0	0	0	0	0	0	12.8	411	159	5.7	2.25	1.01	3.81	15.9	3.63	57.99		0.77	6.17		1	1	1	1	1	1	0	0	0	0	0
	2	术后4h替罗非班	5947902	2016-05-20	11	A-31	邱林	28	0	53	1	0	0	0	0	0	0	14.1	219	135	5.19	2.12	0.96	3.39	13.9	3.54	66.37		0.71	5.24	5.3	1	1	0	1	0	1	0	0	0	0	0
	1		1000957813	2016-05-20	7	A-32	葛长有	65	0	76	1	0	0	0	1	0	0	13.1	161	130	4.91	0.85	1.19	3.13	15.4	3.68	59.02		0.9	5.98		1	1	1	0	0	1	1	1	0	0	0
	2		1005742879	2016-05-24	3	A-33	史雪峰	43	0	75	1	0	0	0	0	0	0	10.2	232	161	6.36	8.53	0.91	3.22	12.2	5.3	65.86		0.88	5.3		1	1	1	1	0	1	0	0	0	0	0
	2	术后1h替罗非班	6102006	2016-05-24	8	A-34	王德俊	65	0	55	1	0	0	0	0	0	0	13.2	198	146	4.37	0.85	0.88	2.73	13.8	4.11	56.08		0.78	8.14		1	1	0	0	0	1	0	0	0	0	0
	1	2016-07-11PCI-LAD	1007409103	2016-05-26	5	A-35	杨义新	53	0	82.5	1	1	1	0	0	0	0	13.5	175	143	4.73	1.04	0.91	2.78	31.1	3.77	74.32		1.04	13.72		1	1	1	0	1	1	0	0	1	1	1
	2		1007577541	2016-05-26	6	A-36	杨玉英	64	1	80	1	1	1	1	0	0	0	10	143	146	5.97	2.42	0.91	3.69	13.8	4.1	56.31		1.3	8.28	8.3	1	1	1	1	1	1	1	1	0	0	0
	1		6102598	2016-05-31	3	A-37	刘忠沪	38	0	79	1	1	0	0	0	0	0	10.6	174	147	7.9	4.08	0.97	5.32	29.3	5.12	72.73		0.85	12.11	7.2	1	1	1	1	1	1	1	1	0	0	0
	2	2016-07-07PCI-LCX	ST11087880	2016-06-04	5	A-38	叶万芳	74	0	80	1	1	0	0	0	0	0	9.8	150	138	3.15	0.97	0.53	2.02	27.8	4.83	56.66		0.93	5.83		1	1	0	0	0	1	0	0	0	0	0
	1	2016-07-04PCI-LAD	1002564901	2016-06-04	6	A-39	吴晓峰	36	0	80	1	0	0	0	0	0	0	8.7	151	147	4.34	1.56	0.79	2.79	7.5	5.75	65.94		0.86	5.36	5.7	1	1	1	1	1	1	0	0	0	0	0
	1		1005573702	2016-06-05	3	A-40	李军	53	0	77.5	1	1	0	0	1	0	0	15.5	271	156	4.23	1.47	1	2.49	10.5	5.07	64		0.86	5.56		1	1	1	1	0	1	0	0	0	0	0
	1		ST11051012	2016-06-06	4	A-41	付永年	49	0	73	1	0	0	0	0	0	0	6.9	167	137	3.67	3.3	0.66	2.11	9.2	4.6	65.7		0.96	6.46		1	1	1	1	1	1	1	1	0	0	0
	1		6101269	2016-06-07	7	A-42	吴作卿	48	0	84	1	0	0	0	0	0	0	10.5	192	153	3.98	0.92	0.77	2.49	17.6	4.63	72.33		0.78	5.72		1	1	1	1	1	0	1	1	0	0	0
	2		1001507176	2016-06-07	6	A-43	郭世忠	65	0	70	1	1	0	0	0	0	0	10.5	216	130	3.13	0.6	0.96	1.61	13.2	5.38	52.64		0.7	7.32		1	1	1	0	0	0	0	0	0	0	0
	1	房颤	6101252	2016-06-07	8	A-44	张玉芹	74	1	57	0	1	1	1	0	0	0	10.5	205	136	4.32	2.99	0.76	2.58	28.8	7.44	57.66		0.9	15.21		1	1	1	0	1	1	1	1	0	1	0
心脏破裂死亡	2		6101235	2016-06-08	5	A-45	于国忠	74	0	82	0	1	1	1	0	0	0	9.6	208	133	4.11	1.12	1.01	2.35	17.3	4.94	57.25		0.87	6.98	5.9	1	1	1	1	1	0	0	0	0	0	1
	2		6112699	2016-06-11	6	A-46	武新柱	59	0	70	1	0	1	0	0	0	0	11.1	294	149	5.51	2.79	0.98	3.44	8.4	4.33	50.42		0.73	10.23	6.4	1	1	1	1	1	0	0	0	0	0	0
	2	术后1h替罗非班、房颤-金属瓣	1000068439	2016-06-12	5	A-47	刘国伟	58	0	80	0	1	0	0	0	0	0	8.6	131	142	3.18	0.62	0.83	1.84	25.4	5.05	69.34		0.78	6.05		1	1	1	1	0	0	0	0	0	0	0
	2	放弃医学治疗	4864873	2016-06-12	2	A-48	王刚	41	0	65	1	0	0	0	1	1	0	7.4	375	127	3.39	4.85	0.89	1.98	5.7	3.78	69.9		0.94	5.06	5.6	1	1	1	1	1	0	1	1	0	0	0
	1		1002844308	2016-06-13	7	A-49	佐常英	73	1	65	0	1	0	0	0	0	0	9.9	246	131	5.53	1.73	1.16	3.38	23.1	5.78	56.19	302	0.75	6.63	6.5	1	1	0	0	0	0	0	0	0	0	0
	2		ST23022526	2016-06-15	6	A-50	郑国连	70	0	75	1	1	1	1	0	0	0	9.7	151	118	4.08	1.98	0.64	2.63	12.1	8.95	89.62		1.57			1	1	1	1	1	1	1	1	1	0	0
	1		1001548796	2016-06-16	4	A-51	邱宝东	57	0	85	1	0	1	0	0	0	0	7.6	213	145	3.8	2.18	0.62	2.35	12.5	4.94	83.64		0.91	6.59		1	1	1	1	1	0	0	0	1	0	0
	1	UA	ST11081294	2016-06-15		A-52	杨福成
	2		6105186	2016-06-17	14	A-53	路绵海	61	0	63	1	1	0	1	0	0	0	9.1	201	201	5.48	1.01	0.9	3.58	14.1	4.25	71.7		0.94	6.03		1	1	1	1	1	1	1	0	0	0	0
	1		6105151	2016-06-18	5	A-54	王珍珠	76	1	71	0	1	0	0	0	0	0	6.2	172	137	5.14	1.3	0.97	3.22	13.6	5.62	69.69		1.2	5.52		1	1	1	1	1	0	0	0	0	0	0
	1	2016/10/25PCI-LM-LAD	1002025634	2016-06-18	4	A-55	许元抚	38	0	90	1	0	1	0	0	0	0	8	183	155	5.53	2.11	0.83	3.59	9.1	6.98	107.39	417	1.17	10.55		1	1	1	1	0	1	0	0	0	0	0
	2		6104714	2016-06-22	9	A-56	刘平	47	0	60	1	1	0	0	0	0	0	11.8	245	141	4.39	1.71	0.88	2.7	20.3	4.57	81.95		1.2	5.86		1	1	0	0	0	1	0	0	0	0	0
	1	术后3h替罗非班	6104682	2016-06-22	5	A-57	王涛	35	0	52.5	1	0	0	0	0	0	0	8.3	210	132	5.2	4.31	0.81	3.18	24.5	5.02	81.18		1.04	6.09		1	1	1	1	0	1	0	0	0	0	0
	1	2016-07-29入院PCI-LAD	1007677255	2016-06-21	7	A-58	刘廷胜	46	0	69	1	1	0	0	0	0	0	11.2	191	138					15.9	5.54	56.13		0.77	10.66		1	1	1	1	1	0	0	0	0	0	0
左心衰	1	25日心动过速意识丧失	2000023888	2016-06-23	10	A-59	刘成信	82	0	79	0	1	0	1	0	0	0	13.1	160	136	4.6	1.31	1.17	2.65	27.1	5.52	85.09		1.72	6.59		1	1	1	1	0	1	0	0	0	0	0
	1		1007708972	2016-06-24	6	A-60	高波	45	0	75	1	0	0	0	0	0	0	11.9	196	162	5.15	1.16	0.83	3.51	22.8	4.05	75.75	290	0.64	6.84		1	1	1	1	0	1	0	0	0	0	0
	2	术后2h替罗非班	1006144906	2016-06-26	7	A-61	田英	66	0	66	1	0	0	0	1	0	0	13.5	233	130	5.24	1.58	0.88	3.55	14.7	4.01	73.37		1.1	6.17		1	1	0	0	1	1	1	1	0	0	0
	2		6100740	2016-06-27	11	A-62	金明玉	55	1	75	0	1	0	0	0	0	0	7.4	283	128	3.59	1.44	1.08	2.05	26.4	2.22	58.52		0.8	5.13		1	1	1	1	0	1	0	0	0	0	0
	1		HL06723949	2016-06-27	4	A-63	雷灵	61	0	73	1	1	1	0	0	0	0	10.2	146	145	3.6	1.42	0.81	2.18	13.7	7.69	64.83		0.91	10.06	8	1	1	1	1	1	0	1	1	0	1	0
	1		6104520	2016-06-28	7	A-64	李振元	74	0	75	0	1	0	1	0	0	0	10.3	217	134	4.12	1.28	1.18	2.22	18.5	5.12	82.01		1.28	4.91		1	1	1	1	0	0	0	0	0	0	0
	1	满族	6104322	2016-06-29	4	A-65	姜文贤	62	1	75	0	1	1	0	0	0	0	9.5	185	119	4.88	1.27	1.03	2.94	11.1	3.86	52.3	267	0.89	16.3		1	1	1	0	0	1	0	0	0	0	0
	2		1007739762	2016-06-30	5	A-66	李坤德	46	0	73	0	0	1	0	0	0	0	12.4	255	135	5.65	0.99	0.81	3.79	11	4.54	74.33		0.85	8.97	7.9	1	1	1	1	1	0	0	0	0	0	0
	2	锡伯族	1004285444	2016-06-30	7	A-67	卜宝军	45	0	74	1	1	0	0	0	0	0	14.8	278	138	3.83	2.38	0.65	2.28	13	4.64	59.65		0.6	7.74		1	1	1	1	0	1	1	1	0	0	0
	2	术后2h替罗非班	6104307	2016-06-30	2	A-68	宁艳平	61	0	76	1	1	0	1	0	0	0	8.4	168	139	4.68	1.66	1.06	2.63	13.6	7.06	103.01		1.41	5.36		1	1	1	1	1	0	0	0	0	0	0
	1		6104053	2016-07-02	12	A-69	李久臣	62	0	62	1	0	0	0	0	0	0	14.3	224	137	4.91	1.08	0.85	3.23	14.2	4.96	62.33		0.96	5.63		1	1	1	1	0	1	1	1	0	0	0
	1		6205215	2016-07-08	5	A-70	薛桂芝	71	1	56	1	0	0	0	0	0	0	4.4	133	96	4.59	1.58	1.04	2.61	11.2	4.54	68.69		1.08	5.2		1	1	0	1	0	0	1	1	0	0	0
	1		6204813	2016-07-11	4	A-71	马德才	70	0	60	0	0	0	0	1	1	0	14.4	120	158	8.35	1.15	1.56	4.91	21.4	9.91	68.55		1.26	6		1	1	1	1	1	0	1	1	0	0	0
心衰	2	术后4h替罗非班	1005615076	2016-07-12	11	A-72	郝先超	66	0	73	1	0	0	1	0	0	0	11.6	172	142	4.85	3.42	0.67	2.91	10.8	5.55	71.73	377	0.91	14.67	8	1	1	1	0	0	1	1	1	1	1	0
	2	2016-08-24PCI-RCA远段	1006106084	2016-07-17	6	A-73	刘维坤	53	0	84	1	1	0	0	0	0	0	10.1	259	143	6.71	0.75	1.06	4.57	9.4	3.81	53.88		0.75	6.82		1	1	1	0	0	1	0	0	0	0	0
	1		1004390735	2016-07-18	7	A-74	张恩辉	38	0	105	1	1	0	0	0	0	0	8.8	163	139	4.57	2.36	0.75	2.76	11.8	5.14	66.66	548	0.96	6.16		1	1	1	1	0	1	0	0	0	0	0
	2		6203296	2016-07-21	8	A-75	马勤礼	76	0	90	1	0	0	0	0	0	0	8.2	178	145	4.95	1.08	1.01	3.04	12.6	4.45	71.45		0.94	6.14		1	1	1	1	1	0	1	1	0	0	0
	2		1006847037	2016-07-24	8	A-76	孙秀华	59	1	49	1	0	0	0	0	0	0	7.1	95	104	3.57	0.87	1.01	1.89	8	9.36	103.46		1.38	4.22		1	1	0	0	0	1	0	0	0	0	0
	2		6202858	2016-07-24	2	A-77	李克朋	55	0	55	1	0	0	0	0	0	0	8.9	192	120	3.75	0.71	0.8	2.23	9.5	5.1	63.79	259	0.65	5.99		1	1	1	1	0	1	0	0	0	0	0
	2	满族	1003163823	2016-07-25	5	A-78	郎雪冰	35	0	90	1	1	0	0	1	0	0	11.6	195	169	6.79	4.62	0.78	4.34	20.7	3.98	79.52		1.08			1	1	1	1	1	0	1	1	0	0	0
	1		1006347670	2016-07-25	7	A-79	郑连俊	57	0	82	0	1	0	1	0	0	0	13.9	259	163	5.26	1.38	1.18	3.31	36.3	5.12	59.08		0.85	6.43		1	1	1	1	0	0	1	1	0	0	0
	1		1002928526	2016-07-30	6	A-80	刘跃斌	45	0	75	1	1	0	0	0	0	0	14	258	166	4.81	1.73	1.14	2.7	24.3	4.63	69.82		0.58	5.38		1	1	1	1	1	0	0	0	0	0	0
	2		6201982	2016-07-30	6	A-81	伊魁元	66	0	70	1	1	0	0	0	0	0	10.2	216	153	5.32	0.82	1.22	3.05	14	4.03	55.36		0.45	8.62		1	1	1	1	0	1	0	0	0	0	0
	1		1002106427	2016-08-01	7	A-82	孙传辉	47	0	86	1	0	0	0	0	0	0	12.6	203	146	4.27	2.6	0.96	2.34	11.6	3.97	61.79		0.53	5.04		1	1	1	0	1	0	0	0	0	0	0
	1		1002190188	2016-08-05	6	A-83	王连生	62	0	80	0	1	0	0	1	1	0	13	251	149	3.25	1.81	0.89	1.59	20.5	7.07	105.27		1.64	7.62		1	1	1	1	1	1	1	1	0	0	0
	2		6200603	2016-08-09	10	A-84	龚庆朋	71	0	45	1	0	0	0	0	0	0	10.4	216	131	4.35	1.16	0.89	2.4	13.3	6.21	67.77		0.74	6.5		1	1	1	1	1	1	1	1	0	0	0
	1		1006958832	2016-08-09	7	A-85	段兴权	66	0	68	0	1	1	1	0	0	0	8.9	268	142	7.49	2.52	0.99	4.49	28.9	7.81	108.05		1.29	14.14	10.9	1	1	1	1	1	0	1	1	1	0	0
	2		1002064118	2016-08-09	8	A-86	王玉竹	73	1	53	0	1	1	1	0	0	0	11.6	235	110	5.16	4.61	0.83	2.69	6.4	6.31	71.24		1.13	22.97	14.6	1	1	1	1	0	0	0	0	1	1	0
	2	2016-09-26PCI-LAD、LM、LCX	6288747	2016-08-11	7	A-87	朱秀珍	80	1	60	0	1	0	0	1	0	0	8.7	195	98	5.53	1.02	1.1	3.22	12.7	7.08	90.75		1.39	8.16		1	1	1	1	0	1	1	1	0	0	0
	1	术后1h替罗非斑	6288699	2016-08-11	2	A-88	邵光	58	0	95	1	0	0	0	0	0	0	10.9	156	150	4.88	2.75	0.68	2.96	14.3	7.62	109.58		1.06	6.42		1	1	0	1	0	1	0	0	0	0	0
	1		ST11039358	2016-08-12	12	A-89	冮毅	75	0	75	0	1	0	0	0	0	0	9.3	173	129	4.23	0.74	1.2	1.99	12.3	6.04	72.53		0.84	10.31		1	1	1	1	0	1	1	1	0	0	0
	2		1002468608	2016-08-13	8	A-90	王彦	57	1	68	0	1	0	1	0	0	0	8.8	160	120	5.71	1.59	0.92	3.74	16.7	3.36	58.18		0.82	7.83		1	1	1	1	1	1	1	1	0	0	0
	1		1001952742	2016-08-14	12	A-91	李秀凤	77	1	60	1	0	0	0	0	0	0	9.2	238	148	6.24	1.23	1.28	4.23	14.4	7.47	56.51		0.92	6.96	5.8	1	1	1	1	0	1	1	1	0	0	0
	1		1004949523	2016-08-16	8	A-92	李守民	76	0	75	0	1	1	1	0	0	0	7.4	153	110	4.24	1.45	0.76	2.68	10.9	5.13	83.58		1	11.63		1	1	1	0	0	1	0	0	0	0	1
	1	2016-09-23 PCI-LAD	1001611603	2016-08-19	7	A-93	陈森	65	0	70	1	0	1	0	0	0	0	8.8	306	150	5.32	4.33	1.04	3.14	18.3	3.48	45.16		0.56	8.11	8.4	1	1	1	1	0	1	0	0	1	0	0
	1		1003920450	2016-08-20	7	A-94	郭庆华	60	0	98	1	0	0	0	1	1	0	9.2	163	140	4.17	1.38	1.06	2.46	19.8	5.1	56.49		0.7	6.9		1	1	1	1	1	1	0	0	0	0	0
	1		6284577	2016-08-21	4	A-95	张玉珍	71	0	80	1	0	0	0	0	0	0	8.8	171	138	3.77	0.93	0.8	2.29	17.4	7.01	76.49		1.17	4.95		1	1	1	0	0	1	0	0	0	0	0
心衰	2	盐酸吗啡术中用	ST11064971	2016-08-27	18	A-96	谭建华	70	1	49	1	1	1	1	0	0	0	15.1	223	116	5.85	1.27	1.19	3.77	16.5	12.52	133.45		3.19	10.45	6.1	1	1		1		1	1	1	0	0	0
	1		1003930655	2016-08-29	6	A-97	方贺营	64	0	75	1	0	1	0	0	0	0	10.1	182	114	4.47	2.65	0.71	2.83	10.4	4.7	67.15		0.74	10.8	6.9	1	1	0	0	1	1	0	0	0	0	0
	2		1002052348	2016-08-30	1	A-98	郑国祥	78	0	70	1	0	0	0	1	1	0	13.8	171	127	5	1.3	0.93	3.18	11.6	5.53	61.7		0.65	8.1		1	1	1	0	1	1	1	1	0	0	0
	1		1004477999	2016-08-30	6	A-99	张林	38	0	75	0	0	0	0	0	0	0	11.3	228	169						5.27	86.81			6.35		1	1	1	1	0	1	1	1	0	0	0
	2		6286052	2016-09-01	4	A-100	王铁军	52	0	74	1	0	1	0	0	0	0	15.1	173	146	3.99	2.13	0.85	2.34	12.8	9.21	87.83		1.11	9.24	7.7	1	1	1	1	0	1	1	0	0	0	0
	2		1000277647	2016-09-02	5	T-01	涂成方	62	0	80	1	1	1	0	0	0	0	12.7	314	110	6.11	2.01	0.73	4.25	8.7	7.49	109.24		1.5	8.67	7.2	1	1	0	0	0	1	0	0	0	1	0
	2		ST23041555	2016-09-09	6	T-02	施振清	65	0	75		1	1					8.7	243	117	3.92	1.18	0.67	2.35	10	7.85	93.1			6.41		1	1	0	1	0	1	1	0	0	0	0
	1		6357847	2016-09-09	9	T-03	孙俊余	74	0	55	1	1	0	0	1	0	0	13.1	128	156	5.33	0.75	1.33	3.25	15.9	12.19	68.28		1.04	8.83		1	1	1	1	1	1	1	0	0	0	0
	2	酸中毒、急性肝肾损伤	1003683057	2016-09-13	1	T-04	程玉珍	78	1		0	1	0	0	0	0	0
	2		2000035908	2016-09-16	4	T-05	姚彬	36	0	84		0	0					8.6	189	144	6.62	4.12	0.8	4.17	17.2	4.43	65.48			7.13	6	1	1	1	1	1	0	0	0	0	0	0
	2		6353684	2016-09-16	5	T-06	王维芬	72	1	65	1	1	0	0	0	0	0	9.7	226	112	4.06	2.09	0.96	2.21	11.3	4.43	43.8		0.78	6.04		1	1	1	0	0	1	0	0	0	0	0
	1		6353686	2016-09-17	1	T-07	陶纯宝	57	0	75	1	1	0	0	1	1	0	8.2	277	141	4.82	2.12	0.83	2.86	21.8	5.53	68.07	556	0.75	5.32		1	1	1	1	0	1	1	1	0	0	0
	1	蒙古族	LN00020928	2016-09-17	4	T-08	王东栋	56	0	74	0	0	0	0	0	0	0	8.4	215	144	4.8	0.91	1.14	2.75	26.5	4.68	73.52		0.65	5.69		1	1	1	1	0	0	0	0	0	0	0
	2		6354996	2016-09-25	4	T-09	关丽娟	71	1	50	1	0	0	0	0	0	0	5.1	210	114	4.37	1.08	1.06	2.49	6.8	5.76	54.55		0.78	7.75	6	1	1	1	1	0	0	0	0	0	0	0
	1		1001127212	2016-10-08	6	T-10	李东生	56	0	65	1	1	0	0	1	0	0	10.3	227	136	3.22	1.38	0.97	1.85	12	6.9	82.89		1.43	6.14		1	1	0	0	0	1	0	0	0	0	0
	1		1005045076	2016-10-10	5	T-11	孙桂侠	75	1	60	0	1	0	0	0	0	0	8.9	274	137					19.3	13.01	137.56		2.23	5.76		1	1	1	1	1	1	1	1	0	0	0
	1		6396735	2016-10-12	6	T-12	李志	46	0	70	1	0	0	0	0	0	0	9.8	233	131	4.19	0.89	0.66	2.64	11.4	4.32	54.83		0.64	7.24		1	1	1	1	0	0	0	0	0	0	0
	2	2016-11-11 PCI-LCX	1006965018	2016-10-15	4	T-13	刑宝芝	59	0	76	1	1	0	0	0	0	0	9	178	136	5.17	1.13	0.91	3.14	11.9	9	70.4		0.84	5.66		1	1	0	1	0	0	0	0	0	0	0
	2		6357031	2016-10-16	10	T-14	张春阳	65	0	65	1	1	0	0	0	0	0	12.6	244	149	4.11	1.03	1.03	2.55	11	6.76	85.33		0.97	8.7	5.8	1	1	1	1	0	1	1	1	0	0	0
	1		6357079	2016-10-17	8	T-15	杜国润	77	0	85	1	0	0	0	1	0	0	10.4	165	114	4.68	1.46	1.01	2.7	11.9	15.79	297.39		3.72	4.77		1	1	0	1	1	0	1	0	0	0	0
	2		6357178	2016-10-17	7	T-16	刘素珍	73	1	55	0	1	0	0	0	0	0	5.5	90	108	4.48	1.25	1.08	2.55	32.4	6.77	62.68		1.06	6.65		1	1	1	1	1	0	0	0	0	0	0
	1		1006427644	2016-10-21	4	T-17	曹明礼	54	0	90	0	1	0	0	0	0	0	9.3	195	156	3.63	1.51	0.8	2.15	44.2	4.3	85.13	358	0.91	6.57		1	1	1	1	0	1	0	0	0	0	0
	1		3157901	2016-10-21	5	T-18	孟庆民	49	0	75	1	0	0	0	1	1	0	5.9	195	146	4.69	1.51	0.88	2.8	36.9	4.55	63.85		0.87	5.42		1	1	1	1	0	1	1	1	0	0	0
急性心衰肝肾不全房颤、	2		6418603	2016-10-24	21	T-19	赵永芳	76	1	50	0	1	0	1	1	0	0	9.9	166	120	7.07	1.39	1.57	4.52	19.8	7.9	103.62		1.42	10.38	6	1	1	0	1	0	0	0	0	0	0	0
	2	NSTEMI	2000015211	2016-10-26	5	T-20	王保岩	72	0	80	1	1	0	0	0	0	0	7.7	231	141	5.41	0.84	1.53	2.96	14.8	5.49	68.88		0.87	6.98		1	1	1	1	1	0	0	0	0	0	1
	1		1002727229	2016-10-26	6	T-21	刘阳	55	0	84	1	0	1	0	1	1	0	11.6	148	132	3.94	1.4	0.97	2.16	13.8	7.6	78.41	225	0.99	14.12		1	1	1	1	0	1	1	1	0	0	0
		术后1h替罗非班	1002803069	2016-10-29		T-22	苏广君	63	0
	2		1001141010	2016-10-31	5	T-23	张焕林	85	0	70	0	0	0	1	0	0	0	9.9	144	142	3.39	1.51	0.87	1.73	15	5.66	112.97		2.05	6.07		1	1	0	1	0	1	1	1	0	0	0
	1		1001339404	2016-11-01	9	T-24	窦全福	61	0	58	1	1	0	0	0	0	0	10.6	325	148	4.32	1.94	0.87	2.41	10.1	4.05	56.13		0.87	6.75		1	1	1	1	0	0	0	0	0	0	0
	1		1004011781	2016-11-02	6	T-25	牛贵军	52	0	80	1	1	1	0	0	0	0	15.6	312	139	5.69	2.34	1.26	3.51	13.3	3.76	60.8		0.59	7.14		1	1	0	0	0	1	0	0	0	0	0
	1	择期PCI-LAD	1001043101	2016-11-03	6	T-26	陈克忠	56	0	71	1	0	1	0	0	0	0	10.1	210	143	4.91	0.35	1.06	2.99	13.1	5.22	55.89		0.66	12.26	7.9	1	1	1	1	0	1	1	1	0	1	0
	1		6402025	2016-11-06	4	T-27	赵海全	70	0	60	1	0	0	0	0	0	0	6.9	190	124	4.36	0.86	1.28	2.3	10.4	7.04	61.92		1.08	5.49	5.3	1	1	1	0	0	0	0	0	0	0	0
	2	盐酸吗啡术中用	1003094516	2016-11-07	5	T-28	吴龙兵	50	0	75	1	1	0	0	1	1	0	8.5	195	132	5.24	1.96	3.45	0.93	11.5	2.76	66.29		0.89	5.15		1	1	0	1	0	0	0	0	0	0	0
	2	盐酸吗啡术中用	6401802	2016-11-08	16	T-29	刘晓东	36	0	80	1	1	0	0	0	0	0	14.8	264	133	6.69	3.69	1.02	4.1	13.8	4.61	63.76	491	0.66	6.41		1	1	1	1	0	1	0	0	0	0	0
	2		1002935512	2016-11-08	4	T-30	胡强	53	0	80	1	1	1	0	1	0	0	8.6	214	142	5.2	1.48	1.17	3.03	8.1	5.33	60.84	221	0.59	14.16		1	1	1	1	0	1	0	0	0	0	0
	2		1007611718	2016-11-08	6	T-31	朱桂莲	58	1	52	0	1	0	0	0	0	0	10.3	219	134	4.97	0.93	1.15	2.82	9.6	4.88	54.26	259	0.88	5.3		1	1	1	1	0	1	0	0	0	0	0
	1		1004997864	2016-11-10	5	T-32	刘鼎	39	0	90	1	1	0	0	0	0	0	13	248	170	5.7	5.12	0.93	3.25	19.6	4.18	79		0.97	7		1	1	1	1	0	0	1	1	0	0	0
	2		1002803016	2016-11-10	5	T-33	赵卫民	61	0	75	0	1	1	0	0	0	0	9.4	197	131	4.94	2.02	1.18	3.02	9.7	7.79	99.52		0.93	11.75	7.4	1	1	1	0	0	0	0	0	0	0	0
	2	房颤	1001031910	2016-11-10	12	T-34	陈禹	45	0	45	1	1	1	0	0	0	0	11.4	199	142	6.83	2.55	0.94	4.37	16.8	8.9	141.53		1.81	18.71	9.6	1	1	0	0	0	0	1	1	1	0	0
	2	NSTEMI	6407283	2016-11-14	6	T-35	汪云佐	77	0	63	1	0	1	0	0	0	0	8.6	163	138	4.91	1.24	0.75	3.07	23.9	12.66	174.39		2.15	8.08	7.3	1	1	1	1	0	0	1	1	1	1	0
急性左心衰、心脏破裂死亡	1	吗啡术后用	6407350	2016-11-14	6	T-36	杨庆文	66	0	80	1	1	1	1	0	0	0	11.3	220	119	4.4	2.29	0.76	2.94	7.8	18.44	167.93		2.45	24.3		1	1	1	0	1	1	1	1	1	1	0
	1		6410348	2016-11-15	9	T-37	周文峰	71	0	65	1	1	0	0	1	1	0	9.4	123	164	4.97	1.62	0.96	3.02	15.5	6.12	79.99		1.29	5.47		1	1	1	0	1	0	0	0	0	0	0
	2		6410378	2016-11-15	8	T-38	赵凤艳	68	1	65	0	0	0	0	0	0	0	8	180	108	4.43	0.25	1.28	2.51	14.1	6.53	61.71		1.06	3.94	5	1	1	1	1	0	0	0	0	0	0	0
	2		6410357	2016-11-15	5	T-39	胡忠武	45	0	65	1	0	0	1	0	0	0	9.1	191	144	5.48	1.53	1.22	3.26	31.3	5.95	65.77		0.97	5.23	4.8	1	1	1	1	1	0	0	0	0	0	0
	2	吗啡术中用	1004066601	2016-11-18	18	T-40	李丽华	65	1	55	0	0	0	0	0	0	0	10.5	212	114	5.82	1.69	1.16	3.51	8.9	4.43	47.45	347	0.47	7.92		1	1	0	1	0	1	1	1	0	0	0
	2		1002173848	2016-11-19	6	T-41	苗丰域	71	0	75	0	1	1	1	0	0	0	10.5	143	145	4.8	1.88	0.95	3.03	23.9	6.3	72.04		0.63	12.65	11.2	1	1	1	1	1	0	1	1	0	1	0
	1		1004039418	2016-11-20	6	T-42	石长垠	84	0	61	0	0	0	0	0	0	0	6.3	207	128	5.31	0.53	1.12	3.03	13.1	6.49	78.16		0.93	6.39	5.4	1	1	0	1	1	1	0	0	0	0	0
	2		1000308212	2016-11-21	7	T-43	杨兴国	75	0	62.5	0	1	0	0	0	0	0	7.3	197	139	6.77	3.41	1.13	4.06	12.1	5.13	57.41	325	0.48	8.42	5.7	1	1	1	1	0	1	0	0	0	1	0
	2	血小板异常	1000882852	2016-12-01	8	T-44	吴剑波	48	0	65	1	1	0	1	0	0	0	8.5	418	130	4.22	1.11	0.98	2.37	6.5	4.31	65.42		0.77	7.26		1	1	1	1	1	1	0	0	0	0	0
	1	UAP	1000561538	2016-12-06	2	T-45	孙东涛	69	0	50
	2	于急诊室颤	1000092828	2016-12-07	6	T-46	刘志友	59	0	80	1	0	1	0	0	0	0	10	203	147	3.06	1.13	0.76	1.89	19	4.77	91.89		0.64	6.87	6.5	1	1	1	1	1	1	0	0	0	0	0
	1		6440816	2016-12-10	5	T-47	齐万龙	67	0	75	1	1	0	1	0	0	0	8.3	205	141	4.08	1.53	0.76	2.52	18.6	5.47	64.52		0.59	5.32		1	1	1	1	1	1	0	0	0	0	0
	1		1006174388	2016-12-21	4	T-48	刘锡财	57	0	65								9.1	174	134	4.22	2.61	0.82	2.47	14.3	6.83	80.49	277	0.65	13.64		1	1	1	1	0	1	0	0	0	1	0
	2	糖尿病肾病、双眼糖尿病性视网膜病III期	1005635139	2016-12-23	7	T-49	刘克勤	65	0	77	1	1	1	0	0	0	0	4.6	205	142	5.04	0.54	1.32	2.82	13.7	13.7	177.92		1.58	13.91		1	1	1	1	0	1	0	0	1	0	0
	1		10012174690	2016-12-25	3	T-50	王春来	61	0	70	1	1	0	0	0	0	0	8.4	174	154	5.22	1.25	1.37	2.94	20.7	7	98.14		0.82	6.45		1	1	1	1	0	1	1	1	0	0	0
	1		6441627	2016-12-29	11	T-51	薛荫双	76	1	53	0	0	1	1	0	0	0	11.8	368	128	5.06	1.51	1.14	2.97	11.7	10.92	59.54		0.76	11.4		1	1	1	1	0	1	1	1	0	1	0
	2	GRACE评分127分，危险分层：中危	6441506	2016-12-30	3	T-52	于德海	58	0	50	0	0	0	0	0	0	0	9.2	200	145	3.1	0.91	0.89	1.68	12.9	4.37	56.15	0	0.54	10.03		1	1	1	1	1	0	1	1	0	0	0
	2		6331653	2016-12-31	12	T-53	连茂安	54	0	60	1	1	0	0	0	0	0	10.2	197	125	3.65	1.25	0.83	1.9	18.4	5.11	96.08	337	0.78	6.16		1	1	1	1	0	1	0	0	0	0	0
	2		6443616	2016-12-31	14	T-54	孙素贤	69	1	60	0	1	1	1	0	0	0	11.9	188	130	5.84	1.51	1.39	3.23	24.2	4.76	45.8		0.41	11.29		1	1	1	0	1	1	0	0	1	0	0
	1		6443439	2017-01-01	6	T-55	杨鲸威	35	0	69	1	0	0	0	0	0	0	8	174	157	4.88	1.51	0.95	2.79	9.4	5.7	59.72	401	0.69	5.05		1	1	1	0	0	1	0	0	0	0	0
	2		1002905053	2017-01-01	4	T-56	赵永亮	63	0	85	0	0	0	0	0	0	0	11	244	156	6.97	2.51	1.09	4.06	12.2	4.23	67.46	302	0.57	6.84		1	1	1	1	1	1	0	0	0	0	0
	2		1004485240	2017-01-03	7	T-57	邱文华	65	1	65	0	1	1	0	1	1	0	7.7	257	131	5.9	2.08	1.26	3.3	11.1	3.57	54.46	185	0.58	8.58	7.6	1	1	1	1	1	1	0	0	0	1	1
	1		1000291221	2017-01-12	7	T-58	张英杰	62	1	75	0	1	1	0	0	0	0	12.2	203	117	5.26	2.54	0.88	2.84	9.4	4.3	51.2		0.78			1	1	1	1	0	1	0	0	1	0	1
	2		6390138	2017-01-19	5	T-59	刘向阳	48	0	85	1	0	1	0	0	0	0	10.8	222	155	2.63	1.11	0.77	1.26	12.6	3.07	38.85	200	0.48	8.24	7.6	1	1	1	1	0	1	0	0	0	0	0
	2		1002510089	2017-01-20	4	T-60	祁忠祥	48	0	60	0	1	0	0	0	0	0	15	274	147	3.83	0.5	1.05	2.13	27	5.53	64.38		0.65	7.04		1	1	1	1	0	0	0	0	0	0	0
	1		6389537	2017-01-23	3	T-61	张玉兰	77	1		0	0	1	0	0	0	0	8.9	176	118						4.43	54.28		0.77			1	1	1	1	0	0	1	1	0	1	0
	1		1002831790	2017-02-03	5	T-62	杨伟春	53	0	67	1	0	0	0	1	1	0	9.4	207	149						6.17	75.62		0.63			1	1	1	1	0	0	1	1	0	0	0
	1		HL05236399	2017-02-05	3	T-63	张克莲	66	1	55		1						8.3	225	120	6.97	1.45	1.3	4.04	13.2	5.16	49.18		0.47	6.52		1	1	1	1	1	0	0	0	0	0	0
	1		6580443	2017-02-09	4	T-64	郭欣荣	57	0	93	1	0	0	0	0	0	0	8	211	144	6.65	5.88	0.94	3.88	14.1	4.29	48.81	387	0.56	6.74	6.4	1	1	1	1	0	1	0	0	0	0	1
	1		ST11010114	2017-02-09	32	T-65	于福新	71	0	70								8.4	95	172	5.69	2.11	1.21	3.22	51.6	4.54	67.58		0.63	4.74		1	1	1	1	0	1	1	1	0	0	1
	1		6579962	2017-02-12	4	T-66	商泽斌	33	0	70		1						11.8	231	125	6.95	2.19	1.03	4.4	6.8	10.76	239.65		1.8	5.56		1	1	0	0	0	1	1	1	0	0	1
	1	术后2h替罗非班	DD04834749	2017-02-13	7	T-67	白晶	57	0	75.3	0	1	0	0	0	0	0	13.1	272	156	3.81	1.16	0.97	2.26	30.6	8.24	88		0.74	7.64		1	1	0	1	0	1	1	1	0	0	0
	2		6579622	2017-02-14	5	T-68	佟邵全	68	0	60	0	1	1	0	0	0	0	7.1	319	150	4.21	1.15	1	2.44	14.5	8.01	119.82	428	1.02	19.04	7.8	1	1	0	1	0	1	0	0	1	1	0
	2		1000207114	2017-02-23	5	T-69	王春朴	61	0	66	1	1	1	0	1	1	1	9	262	146	4.62	1.72	1.02	2.58	15.8	8.56	67.54		0.65	16.73		1	1	0	1	1	1	0	0	1	1	0
	2		6560154	2017-02-23	3	T-70	姚英才	70	0	50	0	0	0	0	1	1	0	11	174	139	4.28	0.9	0.87	2.51	17.2	4.83	64.89		0.7	4.63		1	1	0	1	0	0	0	0	0	0	0
	1	2017-03-09CABG	1000389661	2017-02-24	5	T-71	崔文平	59	0	75	1	1	0	1	0	0	0	10.6	235	157						4.22	102.55		0.96			1	1	1	1	1	0	1	1	0	0	0
	2		1002033844	2017-02-26	4	T-72	杨书义	52	0	84	0	1	0	0	0	0	0	14	175	166	5.85	1.08	1.47	3.42	20.7	5.73	74.2		0.56	8.08		1	1	1	1	0	0	1	1	0	0	0
	2		1006965145	2017-03-08	7	T-73	赵洪祥	49	0	60	1	0	0	0	0	0	0	9.9	252	137						2.73	80.19		0.6			1	1	0	1	0	0	0	0	0	0	0
	2		1000079854	2017-03-09	7	T-74	刘家来	54	0	77	1	0	1	0	0	0	0	10.7	169	1338	3.88	1.6	0.77	2.28	11.2	6.52	69.05		0.64	12.26	9.2	1	1	1	1	0	1	0	0	0	1	0
	1		1002654330	2017-03-13	7	T-75	王清海	68	0	75	1	1	0	1	0	0	0	10.1	188	138	4.7	1.5	0.97	2.77	12.8	6.13	84.81		0.81	6.87		1	1	1	0	0	0	0	0	0	0	0
	1		6655386	2017-03-22	26	T-76	晏丽英	55	1	64	0	1	0	1	1	0	0	10.2	189	118						6.27	71.47		0.89	6.8		1	1	1	1	0	1	0	0	0	0	0
	1		6655569	2017-03-23	5	T-77	王庆东	54	0	75	1	0	0	0	0	0	0	10.6	234	154	5.53	1.43	1	3.39	13.2	3.73	50.86		0.46	5.45		1	1	1	1	0	1	0	0	0	0	0
	1	5年前胆囊摘除术	1007986675	2017-03-27	6	T-78	李策祥	85	0	58	0	0	0	0	0	0	0	12.7	190	156	4.18	0.83	1.08	2.1	47.6	4.74	54.02		0.63	5.98		1	1	1	1	1	0	1	1	0	0	0
	1		1006945879	2017-04-08	5	T-79	马光忠	62	0	87	1	0	0	0	0	0	0	6.9	129	130	4.83	0.91	0.87	3.15	19.8	6.1	73.07		0.63	9.22	6.4	1	1	1	1	1	0	1	1	0	0	0
	1	盐酸吗啡术中用	6685364	2017-04-08	7	T-80	岳俊伟	36	0	110	0	0	0	0	0	0	0	11.4	195	150	5.29	2.91	0.78	3.18	9.3	5.67	93.21		0.71	6.57		1	1	0	0	0	0	0	0	0	0	0
	1		1000606390	2017-04-20	7	T-81	于忠民	63	0	84	1	1	0	0	0	0	0	14.3	209	155	5.41	2.46	0.99	3.37	12.6	4.57	64.6		0.63	7.71		1	1	1	1	0	0	0	0	0	0	0
	2		1004901733	2017-04-28	14	T-82	李晶杰	66	1	51		1	0	0		0	0	11	162	120						6.98			0.63	7.53	5.7	1	1	1	1	0	0	1	1	0	0	0
	1	术后3h替罗非班	6800736	2017-05-02	13	T-83	李贺文	67	0		0	1	0	0	0		0	10.3	216	144	4.3	1.38	1.09	2.5	15.8	7.61	73.52		0.78	6.56	5.9	1	1	1	1	0	1	1	1	0	0	0
	1		1005038246	2017-05-21	6	T-84	吕连贵	69	0	61	1	0	0	0	0	0	0	14.4	197	140	4.52	1.18	1.08	2.6	26.8	11.15	91.38		1.06		6	1	1	0	0	0	1	1	1	0	0	0
	1		1002317526	2017-05-21	6	T-85	尚德玉	69	0	70	0	0	0	0	0	0	0	10.5	183	139	4.31	0.53	1.04	2.54		6.7	64.86		0.65	11.88	7.2	1	1	0	0	0	1	0	0	0	0	0
	1	不稳定心绞痛UAP	1001908348	2017-05-23	1	T-86	李宝玉	52	0	70	1	1	0	0	1	1	0
	1		1004997590	2017-05-23	5	T-87	马吉斌	66	0	65	1	0	0	0	1	1	0	13.5	251	148						5.4	88.03		0.84	6.48		1	1	1	0	0	1	0	0	0	0	0
	1		1000449914	2017-05-25	8	T-88	鞠洪水	52	0	110	1	0	0	0	0	0	0	8.8	215	144	5.9	2.24	0.86	3.79	17.7	4.7	52.88		0.68	8.41	6.9	1	1	1	1	1	0	1	1	0	1	0
	1		1005015686	2017-05-31	4	T-89	张义军	72	0	56	0	1	0	0	0	0	0	12.9	221	154	5.69	0.81	1.49	3.44	18.4	7.49	62.97		0.76	6.76		1	1	1	1	0	0	0	0	0	0	0
	1		6972657	2017-08-28	5	T-90	李延富	43	0	65	1	0	0	0	0	0	0	14.8	207	161	5.08	1.51	1.02	2.84	15.1	4.4	64.98		0.74	5.89		1	1	1	1	0	0	0	0	0	0	0
	2	术后3h替罗非班，不影响药效结果	1000082048	2017-08-29	7	T-91	池元杰	70	0	77	1	1	0	0	1	1	0	12.5	168	135	5.02	1.5	1.31	2.61	19.5	4.18	61.68		1	10.24		1	1	1	0	0	1	0	0	0	1	0
	2		1003069624	2017-08-29	8	T-92	王新华	62	1	61	0	1	0	0	0	0	0	9.5	152	138	4.63	1.32	1.13	2.43	14.1	4.58	57.8		0.94	5.29		1	1	0	0	1	1	0	0	0	0	1
	1		1002589425	2017-08-30	5	T-93	韩晓峰	49	0	83	1	0	0	0	0	0	0	11.3	240	149	4.99	2.29	0.91	2.82	12.1	6.81	72.98		0.76	7.88	5.59	1	1	0	0	0	1	0	0	0	0	0
	1	不稳定心绞痛UAP-转外科	6973101	2017-09-02	6	T-94	焦向儒	47	0	70	1	0	1	0	0	0	0	6.4	226	160	9.06	2.3	1.22	6.03	13.6	4.58	49.21		0.69	13.18	11.38	1	1	1	1	1	0	0	0	0	0	0
	1	心律失常	1007284786	2017-09-02	7	T-95	白秀义	54	0	88	1	1	0	0	0	0	0	13.9	203	139	5.08	1.76	0.89	2.95	10.7	7.8	77.43		0.87	5.4		1	1	1	1	1	0	0	0	0	0	0
	2		6973437	2017-09-05	7	T-96	简连财	52	0	64	1	1	0	1	0	0	0	14.4	284	151	5.35	1.15	0.98	3.18	24.1	5.15	69.19		0.68	7.91		1	1	1	1	0	0	0	1	0	0	0
	1		LN00050995	2017-09-07	6	T-97	孟繁安	71	0		1	1	1	0	0	0	0	11.2	142	129						6.36	100.64		1.31			1	1	1	1	0	0	0	0	0	0	0
	1		1002403105	2017-09-08	8	T-98	白绍武	64	0	69		1	1					19	210	124	4.41	2.03	0.84	2.43	10.2	7.58	83.08		0.64	26.43	10.16	1	1	0	0	0	0	1	0	1	0	0
	2	房颤、2017-11-17急性脑梗死	7014826	2017-09-14	7	T-99	王国臣	64	0	82	0	0	1	0	0	0	0	13.6	179	147						11.83	102.2		1.4		8.51	1	1	1	1	0	1	1	0	1	0	0
	1		2000041687	2017-09-27	7	T-100	姚兵	48	0	82	1	1	1	0	0	0	0	10	157	148	4.4	1.11	0.83	2.51	8.2	6.54	71.45		1.16	8.37	9.81	1	1	1	1	1	0	0	1	0	1	1
	1	术后2h替罗非班	7011118	2017-10-02	8	T-101	赵国权	47	0	80	1	0	0	0	0	0	0	17.7	176	164	5.34	4.93	0.73	3.25	7.9	7.31	80.28		0.97	16.19		1	1	1	1	0	0	1	0	0	0	0
	2		1002485151	2017-10-04	8	T-102	李绍芬	61	2	70	0	1	0	0	0	0	0	13.6	268	139	7.07	1.49	1.28	4.3	13	4.25	69.24		1.07	6.58		1	1	1	1	1	0	1	1	0	0	0
	2		7080741	2017-10-12	11	T-103	姜凤云	58	1	60	0	1	0	0	0	0	0	16.2	216	143	5.75	0.66	1.64	2.98	17.9	5.45	47.37		0.58	10.47	5.44	1	1	1	1	0	1	1	0	0	0	0
	2		7081210	2017-10-15	8	T-104	白国林	56	0	70	1	1	0	0	0	0	0	16.2	240	154	5.37	0.96	1.22	3.22	8.4	4.27	71.76		0.94	5.26		1	1	1	1	1	1	1	0	0	0	0
	2	心律失常	1000778762	2017-10-15	6	T-105	王宝振	64	0	80	1	1	0	0	0	0	0	13.5	265	148	4.58	0.76	1.13	2.66	15.9	3.63	50.24		0.89	5.66	5.53	1	1	1	1	1	1	1	0	0	0	0
	2		1002092214	2017-10-31	6	T-106	郭佩琪	61	1	90	1	1	0	0	0	0	0	13.8	175	171	4.79	1.32	0.85	2.87	22.9	7.24	94.9		1.02	6.08		1	1	1	0	1	1	1	1	0	0	0
	1		70805927	2017-11-02	6	T-107	李洪安	69	0		1	0	0	0	0	0	0	7.3	169	141	5.01	0.85	1.44	2.63	15.9	3.54	55.98		0.59	13.36	5.93	1	1	1	1	0	1	1	0	0	0	0
	1		1004360573	2017-11-07	6	T-108	郝明志	59	0	71	1	1	0	0	0	0	0	8.6	224	143	4.94	0.86	1.2	2.97	14.9	3.93	51.03		0.76	4.8		1	1	1	1	0	0	0	0	0	0	0
	1	替罗非班术中用	7077115	2017-11-12	0	T-109	赵德臣	71	0
	1		7174388	2017-11-16	5	T-110	谭树胜	49	0	67	1	0	0	0	0	0	0	14.1	272	143	5.51	2.74	1.3	3.03	12.1	5.46	70.77		0.84	5.91	5.7	1	1	1	1	0	1	0	0	0	0	0
	2	术后1h替罗非班	7174645	2017-11-17	12	T-111	马金发	72	0	60	1	0	0	0	1	1	0	10.3	168	142	6.28	2.05	1.17	3.75	11.7	9.27	87.43		0.82		6.75	1	1	1	0	1	0	0	0	0	0	0
	1	UAP	1004371305	2017-11-21	2	T-112	王春平	57	0	70
	1		7174052	2017-11-22	5	T-113	王明富	63	0	70	1	1	0	0	0	0	0	12.5	232	149	4.2	1.8	0.86	2.47	12.4	5.98	72.04		0.77	5.47		1	1	1	1	0	1	0	0	0	0	1
	2		7173894	2017-11-24	5	T-114	王化成	43	0	80	1	0	0	0	0	0	0	14.4	241	178	6.13	3.11	0.77	3.94	8.9	3.47	57.07		0.62		5.73	1	1	1	1	0	0	0	0	0	0	0
	2		1007921047	2017-11-25	6	T-115	李明余	65	0						1	1	0	11.6	120	128	3.43	0.91	1.21	1.68	14.5	5.69	67.88		0.81	11.56	6.99	1	1	0	1	0	0	0	0	1	0	0
	2		7177534	2017-11-29	7	T-116	邹本树	67	0	70	1	0	0	0	0	0	0	11.2	208	140	4.9	0.71	1.02	3.01	17.5	6.24	74.94		0.87	6.25	5.45	1	1	1	1	1	0	1	0	0	0	0
	2		7177141	2017-12-02	4	T-117	刘德生	44	0	75	0	0	0	0	0	0	0	13.6	220	1244	6.49	2.44	1	4.36	7.2	5.68	66.51		0.72	5.2		1	1	1	1	1	0	0	0	0	0	0
	2		1001242612	2017-12-09	6	T-118	张新奇	50	0	73	0	0	0	0	0	0	0	9.5	227	140	7.88	1.77	1.51	4.62	7.3	4.68	66.46		0.62	9.03	6.4	1	1	0	1	0	1	0	0	0	0	0
	1	术后1h替罗非班	7131618	2017-12-13	5	T-119	朴明俊	52	0	65	1	0	0	0	0	0	0	17.7	295	150	5.43	2.9	1.09	3.05	9.5	5.41	74.07		0.87	7.93		1	1	1	0	0	0	0	0	0	0	0
	1	冠心病家族史	7131860	2017-12-13	5	T-120	孙国彬	55	0	83	1	0	0	0	0	0	0	13.2	221	149	6.18	2.61	1.38	3.43	5.4	4.77	62.69		0.74	12.22	6.6	1	1	1	1	0	1	0	0	0	1	0
	2		1003973116	2017-12-17	8	T-121	李恒	36	0	81	1	0	0	0	0	0	0	10.9	195	138	4.93	1.89	0.89	3.02	14.2	4.07	80.45		0.81	5.2		1	1	1	1	0	1	0	0	0	0	0
	2	NTEMI	7134905	2017-12-18		T-122	齐昌艳	64	1		0	1	1	0	0	0	0
	1		7134891	2017-12-18	4	T-123	戎柏	32	0	90	1	0	0	0	0	0	0	11.3	224	148	4.34	0.41	0.92	2.53	10.6	3.76	75.45		0.72	7.33		1	1	0	1	0	1	0	0	0	0	0
	2	术后1h替罗非班	1003919115	2017-12-19	6	T-124	刘桂杰	65	0	52	0	1	0	0	0	0	0	11.5	134	131	8.34	1.75	1.5	5.35	20.8	4.03	41.29		0.62	9.39		1	1	1	1	0	1	1	0	0	0	0
	1		7252095	2017-12-20	4	T-125	金平	42	0		0	1	0	0	0	0	0	10.3	265	156	6.62	2.54	1.27	3.81	14.6	4.03	62.99		0.81	5.55	5.66	1	1	0	0	1	1	0	0	0	0	0
	2		7252147	2017-12-20	6	T-126	郝朝忠	49	0	55	1	1	0	0	0	0	0	12.7	205	159	6.07	2.52	1.11	3.6	13.6	7.52	78.45		0.86	5.67		1	1	1	1	1	0	0	0	0	0	0
	1	心动过缓、偶发房早	1006010596	2017-12-21	6	T-127	张丽华	62	1	65	0	0	0	1	0	0	0	7.8	252	123	4.99	2.35	1.05	2.7	12.2	9.13	62.1		0.88	5.42		1	1	1	1	1	1	0	0	0	0	0
	2		7252431	2017-12-25	11	T-128	殷会霞	72	1		0	0	0	0	0	0	0	10.5	126	124	4.84	0.59	1.58	2.67	15.4	7.74	86.24		1	6.44	5.54	1	1	0	0	1	1	0	0	0	0	0
	1		7253098	2017-12-29	4	T-129	赵文阳	31	0	85	1	0	0	0	0	0	0	12.6	307	144	5.89	1.64	0.98	3.85	17.1	3.28	78.39		0.72	7.88		1	1	1	1	1	0	0	0	0	0	0
	2		7253054	2017-12-29	6	T-130	史静菊	61	1		0	1	0	0	0	0	0	12.2	187	139	5.27	1.55	1.35	3.06	14.9	5.34	51.23		0.81		6.02	1	1	1	0	0	1	0	0	0	0	0
	1		7253397	2017-12-31	10	T-131	侯德林	58	0	68	1	0	0	0	0	0	0	12.3	92	136	2.21	0.7	1.1	0.84	12.4	8.33	105.59		0.79	8.13	6.03	1	1	0	0	0	1	0	0	0	0	0
	1		1008540016	2017-12-29	7	T-132	佟波	49	0	73	0	0	0	0	0	0	0	12.1	212	154	5.64	0.76	1.23	3.52	18	8.05	62.65		0.65	7.83		1	1	1	1	0	1	0	0	0	0	0
	1		1004291322	2018-01-05		T-133	高崑	59	0	80	1	1	0	0	0	0	0	11.7	214	119	3.62	1.88	0.64	2.07	14.8	4.9	81.18		0.83	5.86		1	1	0	0	1	1	0	0	0	0	0
	2		1005203951	2018-01-07		T-134	徐利
	1		1002057479	2018-01-12		T-135	郭振海
	1		7251303	2018-01-14		T-136	李振海
	1		1000750574	2018-01-15		T-137	马清沂
	1		7250784	2018-01-18		T-138	程淑云
	1		7313232	2018-01-19		T-139	孙宝国
	1		1002867514	2018-01-22		T-140	李阳
	1		100222231	2018-01-22		T-141	王德秋
	1		7312658	2018-01-25		T-142	张志金
	2		7241143	2018-02-01		T-143	邢宝云
	2		7313069	2018-02-02		T-144	王永军
