# Supplementary material for: Gut microbiota induces high platelet response in patients with ST segment elevation myocardial infarction after ticagrelor treatment
Source: eLife. 2022 Mar 8;11:e70240. doi: 10.7554/eLife.70240 (PMC8903831; doi:10.7554/eLife.70240)
Supplement: Figure 4—source data 2. [file elife-70240-fig4-data2.xls]

## Sheet: 工作表1
#OTU_ID	B-15	B-26	A-7	B-7	A-16	A-3	A-14	B-12	B-6	B-9	B-14	B-5	A-8	B-18	B-2	B-22	A-11	A-6	A-9	A-10	A-17	A-18	A-25	B-17	B-19	A-21	B-23	A-24	A-23	B-25	A-5	B-20	B-8	A-1	A-4	B-1	B-3	B-10	A-12	A-13	A-15	B-11	A-22	B-21	B-24	B-4	B-13	A-2	A-19
1,1,1-Trichloro-2,2-bis(4-chlorophenyl)ethane_(DDT)_degradation	24	2	1103	32	84	97	96	38	23	380	58	2	64	34	247	97	13	192	89	276	146	84	3	50	25	35	249	12	67	13	98	171	238	63	225	172	166	114	25	7	130	9	77	108	148	238	28	174	17
ABC_transporters	565887	768247	466129	977289	775288	585464	862331	493540	740770	353823	699602	530593	4383024	2723708	550299	542140	658824	418911	545572	352412	554561	657654	2702817	1107689	720077	592864	608342	746376	1019199	740606	428417	441027	482516	627877	953173	424784	575926	660583	816429	588642	675271	703952	587697	469810	760197	766721	847671	409568	745627
Adherens_junction	0	0	0	0	0	0	0	0	0	0	0	0	0	0	0	0	0	0	0	0	0	0	0	0	0	0	0	0	0	0	0	0	0	0	0	0	0	0	0	0	0	0	0	0	0	0	0	0	0
Adipocytokine_signaling_pathway	19524	21095	23951	19650	21222	22742	23358	20330	19133	23424	23060	22245	26945	20812	20787	18232	19701	25541	24404	21284	16146	17663	18307	16210	26964	15916	18643	12595	21230	12337	19211	21074	26008	22965	25558	24777	24399	20450	18666	16510	22628	19272	20236	17302	19803	22319	19072	28044	18606
African_trypanosomiasis	40	811	51	316	185	1254	130	133	1014	128	270	638	16026	5998	169	150	16	513	896	261	1098	365	9158	419	442	65	490	592	865	175	23	415	490	393	1948	52	60	794	587	41	663	268	306	127	208	279	329	19	632
Alanine,_aspartate_and_glutamate_metabolism	249312	299471	237596	343078	294417	254384	320834	219706	239701	231871	275800	243745	638771	452120	243022	232340	257157	253635	285900	212548	200083	204004	477214	302095	327179	219024	242462	213537	353132	224329	216606	238848	262016	262719	316506	259107	296864	262826	294042	237599	286859	263814	268733	211680	288810	294910	306003	276295	269605
Aldosterone-regulated_sodium_reabsorption	0	0	0	0	0	0	0	0	0	0	0	0	0	0	0	0	0	0	0	0	0	0	0	0	0	0	0	0	0	0	0	0	0	0	0	0	0	0	0	0	0	0	0	0	0	0	0	0	0
Alzheimer's_disease	11286	10830	8776	14430	11412	9128	12751	9975	12217	8586	11112	10489	53038	26568	8568	10730	10751	7299	10988	10034	11118	7763	33879	13931	13026	8574	10787	9606	13876	9634	10017	7941	10275	11278	15242	8755	12645	12810	12008	8825	10813	11336	10747	9561	12104	13397	12404	9098	12339
Amino_acid_metabolism	41231	56698	44929	72980	48019	50207	55593	33674	49120	38076	49397	44196	252644	167467	45300	34669	35356	47846	48359	30949	43280	49297	139616	58535	45870	43535	46520	44959	50410	41736	30682	38709	46320	45443	68160	42397	49469	44939	52487	39316	51364	47473	48939	33430	50714	52092	43546	41934	51621
Amino_acid_related_enzymes	347633	355881	265398	437534	386555	284071	408728	306572	338579	259575	350099	300445	989069	630479	280772	326842	346481	289891	337493	289477	304431	253174	729788	425671	396875	289045	315009	303435	464786	319608	305227	263326	307703	350987	410530	290162	372145	365849	384552	304693	355951	357478	342863	288424	365226	376912	403242	302343	377465
Amino_sugar_and_nucleotide_sugar_metabolism	344262	400920	265746	439031	381400	340838	433569	292908	313462	304921	370918	340560	1106610	802286	350364	321062	338642	345181	373946	294654	294735	332662	808467	413273	414475	331668	318725	335699	415908	329288	298462	323795	345667	354604	421439	345380	364061	365103	384527	336495	408005	363629	344703	296600	372181	402155	389495	363732	350975
Aminoacyl-tRNA_biosynthesis	271636	253230	197251	344301	282679	186130	316696	233506	281934	182124	264449	219749	601739	419831	199222	256752	263123	207434	253927	219339	230507	194764	495602	332984	313475	214978	234024	234059	346018	249403	235868	183310	225578	272653	298007	201686	308261	271752	280248	228913	259204	282396	259767	221802	267834	282738	304739	205997	314366
Aminobenzoate_degradation	26054	33166	31573	32807	28061	32644	35867	21113	28929	27482	29702	25732	172455	97747	31053	26268	23749	28537	30451	24802	28114	39971	92246	36925	36576	31275	35704	33266	29308	31942	23027	23022	34072	26931	45623	28131	34142	29915	29408	29431	36234	28722	26403	28455	36311	30636	25375	28082	29292
Amoebiasis	1334	3912	1305	2094	2647	2889	2918	1237	2521	2033	3384	2688	2068	5234	3622	1175	1014	6927	2471	1029	314	2602	744	2195	3592	1352	1860	1042	2571	939	1128	1842	4134	2346	2459	3915	1556	1221	1659	2214	4691	2283	2184	1599	2265	2348	2528	4308	2841
Amyotrophic_lateral_sclerosis_(ALS)	1925	3483	3047	5935	1990	3778	1706	869	3961	3524	3214	3909	39359	19036	2938	1492	1623	5211	3867	2095	3375	3636	19814	3589	1078	2898	2954	2684	3170	2032	1392	4299	2532	4017	6845	2345	3856	3279	3604	557	2785	1836	2789	1619	3329	2829	1916	1950	2150
Antigen_processing_and_presentation	10848	10654	7138	14439	11025	7786	12033	9150	8359	7920	9433	8212	20450	15081	8047	9928	10294	8168	11205	9492	8956	7289	15331	11467	12240	7801	8760	8577	13258	8998	9529	8050	9431	12324	11527	8954	12708	11055	10626	8636	9564	10110	10092	8608	10219	10680	11939	8612	9291
Apoptosis	58	39	134	530	3	28	33	8	288	459	331	591	221	91	175	165	19	442	32	109	13	78	771	243	110	61	488	13	109	115	43	135	258	87	521	130	100	25	89	33	245	274	137	253	674	618	114	318	152
Arachidonic_acid_metabolism	12686	6706	4134	4580	9609	7126	3462	12978	4105	2619	4398	5205	75779	28290	3942	10666	5130	6628	5717	18415	21068	3841	42152	9753	5323	1822	5890	4631	5144	1953	14359	3200	4066	5608	11843	4060	2226	18145	6236	2596	5853	3791	6246	10364	4581	4969	5885	4583	4809
Arginine_and_proline_metabolism	247891	325264	234667	387151	309010	270067	356480	209347	287218	232268	306210	264260	983860	610495	256703	236776	278328	269766	306529	187945	189737	211824	660726	347673	374888	244984	270699	253573	390480	270790	200663	237869	276898	295363	380557	267650	320438	264238	328867	270460	318470	300703	291030	218408	326954	322982	338272	285410	313934
Arrhythmogenic_right_ventricular_cardiomyopathy_(ARVC)	0	0	0	0	0	0	0	0	0	0	0	0	0	0	0	0	0	0	0	0	0	0	0	0	0	0	0	0	0	0	0	0	0	0	0	0	0	0	0	0	0	0	0	0	0	0	0	0	0
Ascorbate_and_aldarate_metabolism	21115	31542	21200	40666	23729	35816	33478	13912	24097	19211	26033	25653	357669	181106	24959	20389	16207	25938	25440	18990	34983	29133	197164	36389	29689	26209	28486	33793	28435	26254	15402	24130	22443	18300	58012	21940	21273	31745	30608	22126	36072	22954	24323	19233	26030	28941	19876	19484	29001
Atrazine_degradation	2060	2749	4565	2433	2444	3399	2689	1837	4375	1463	3339	3840	64693	30102	1518	1653	1253	3712	2307	1697	3725	2043	33661	4693	3122	2007	3518	3006	1820	1742	1262	947	2854	2832	8920	1112	915	4208	2651	638	4624	2976	1886	1235	3793	2798	2680	1056	4446
Bacterial_chemotaxis	75434	76793	12202	125361	79609	47535	118254	40094	135047	21525	92509	70193	392298	246438	59571	77774	102344	33060	67734	35454	41305	55722	240386	130080	66573	74545	60988	112055	124834	124967	49949	26677	60097	88988	91780	36863	92704	70915	90532	105054	81621	100234	64557	64601	87679	93556	151572	37202	90492
Bacterial_invasion_of_epithelial_cells	13	606	93	215	201	587	48	74	347	92	71	334	46	157	172	34	5	105	541	8	292	88	64	110	73	49	41	173	806	113	1	374	235	285	122	10	23	68	256	33	31	195	172	17	115	163	204	2	31
Bacterial_motility_proteins	142888	148686	37640	242913	133743	121979	247548	68136	305593	46597	182698	157909	1028019	545016	118297	154394	192584	70854	176870	67053	93900	99310	603673	232929	132136	153693	136022	253197	245496	273257	88479	58957	151728	206166	205935	68616	249440	134845	174852	225482	159240	197067	134489	135636	153569	172539	286216	62162	205577
Bacterial_secretion_system	122774	166897	138111	176236	141152	150984	155348	117687	150566	113641	137991	130677	801131	420601	122183	127959	133207	125156	153117	111555	145766	103454	461593	158164	184567	122304	135198	151295	187700	144949	109277	118539	135312	144574	219206	116774	152338	151653	159634	132308	145291	135989	135758	118300	145300	151331	154228	121990	150543
Bacterial_toxins	20931	32241	24043	40302	30286	25731	32186	18566	26897	24147	29120	24825	30469	39775	27626	20372	21624	22571	31064	17419	13761	30655	33233	30943	39660	22445	24925	20219	30865	21335	19161	24916	26825	30537	29652	28441	25334	21059	28215	24892	30122	29168	27214	19837	29219	29502	27991	31299	29999
Basal_transcription_factors	19	19	0	20	64	17	117	322	91	0	31	2	20	16	1	85	467	5	24	6	42	4	610	120	202	51	148	51	89	21	5	63	4	65	45	80	1	43	101	17	32	24	237	41	66	83	95	14	2303
Base_excision_repair	96515	101302	78634	131770	104855	82502	117146	82800	101883	76954	102010	86508	304289	194567	82366	91729	94622	88121	103532	78448	82424	74080	213003	125674	120005	85771	92989	91268	129541	95663	82877	78693	93965	99921	122386	83621	111957	99646	107989	86568	108328	107275	98401	82071	104276	106852	107852	81076	113487
Benzoate_degradation	38326	50208	30898	66487	47399	40391	63153	30093	56246	25058	46733	34565	328756	175944	32612	36641	40493	33909	42570	24966	41154	45318	180267	73885	62239	41583	50867	50317	67436	51798	28862	27962	40242	47557	76573	30611	51981	43038	55268	40117	50997	52199	44261	36357	57909	50862	46580	26755	55806
Betalain_biosynthesis	2	0	1	0	0	0	0	0	6	0	0	0	0	0	0	1	0	0	0	0	0	0	0	5	7	0	16	0	0	7	0	2	2	0	0	0	0	0	7	0	0	0	0	4	9	2	0	0	0
Bile_secretion	3	64	4	0	5	239	12	14	10	1	90	0	9656	2668	0	17	0	0	3	52	80	16	5761	40	24	4	87	149	0	22	0	0	2	6	685	9	9	441	254	4	26	1	57	29	4	18	9	0	576
Biosynthesis_and_biodegradation_of_secondary_metabolites	9459	21599	15046	20901	15516	23800	19696	10085	16160	12576	19134	16137	203107	93314	13242	8802	11840	16524	18285	8984	14834	15482	111633	19299	19211	10544	15934	13019	20935	7970	7092	15480	17025	17220	35153	14133	15335	17258	18808	9219	18840	15589	13633	7387	15815	17421	17200	15915	15425
Biosynthesis_of_12-,_14-_and_16-membered_macrolides	0	0	0	0	0	0	0	0	0	0	0	0	0	0	0	0	0	0	0	0	0	0	0	0	4	0	0	0	0	0	0	0	0	0	0	0	0	0	0	0	0	0	0	3	0	0	0	0	0
Biosynthesis_of_ansamycins	24090	35115	13445	38904	34028	23984	38833	19776	27370	16701	28516	20987	126184	99249	27531	22013	27419	14749	22327	15557	20291	25098	80720	43811	39011	25225	25337	26570	37789	25352	19846	18179	22065	23527	34647	22477	25539	25300	32102	24644	29361	27797	24164	18933	29039	30509	34433	24345	29947
Biosynthesis_of_siderophore_group_nonribosomal_peptides	6203	9558	3527	5611	5722	13974	4858	7750	4207	4417	4181	5791	175340	70346	5047	5495	5662	2966	7618	9092	16682	4744	86022	4519	4930	3240	4842	7607	6828	2394	6179	6093	4176	5305	22897	5383	4913	14608	9440	2958	5371	3514	5638	5321	4487	5246	5571	5736	3315
Biosynthesis_of_type_II_polyketide_backbone	0	0	0	0	0	0	0	0	0	0	0	0	0	0	0	0	0	0	0	0	0	0	0	0	0	0	0	0	0	0	0	0	0	0	0	0	0	0	0	0	0	0	0	10	0	0	0	0	0
Biosynthesis_of_type_II_polyketide_products	0	0	1	4	0	0	0	0	1	0	0	0	1	0	0	2	0	0	2	0	0	0	0	4	0	0	10	0	0	10	0	0	6	0	0	0	0	0	0	0	0	0	0	3	2	2	0	0	0
Biosynthesis_of_unsaturated_fatty_acids	24104	33298	17955	34743	28358	31618	30181	22225	33282	15397	25747	25246	260221	129295	19439	22308	22103	25887	30497	22153	31885	20685	147081	37966	34106	17724	22319	23797	37993	18507	20417	19099	22479	27684	48286	16681	23773	33302	29444	15555	28585	25904	24213	18973	25894	26956	29646	17000	29338
Biosynthesis_of_vancomycin_group_antibiotics	17626	18705	13309	19688	19002	15566	19048	14204	16622	13571	18887	16788	24222	22508	14965	15674	13158	17579	19041	18802	15675	12983	19292	17210	20160	11261	14274	10947	18526	11089	16358	13965	16640	17555	17270	17462	15788	19009	14889	14362	17394	16524	17356	14260	15266	17634	19436	20721	17540
Biotin_metabolism	36006	45874	40238	47242	43247	41635	44976	29927	31401	37263	37995	37913	113220	70518	42430	34148	35585	37929	43903	28081	26692	36428	71867	38515	44404	37374	38457	38275	50947	40740	29171	35106	40253	41071	45092	41574	44846	38690	45939	43055	44260	41192	42826	33614	42035	46218	47938	45637	40316
Bisphenol_degradation	14771	25997	17092	26383	18835	17524	28219	8603	15704	18281	19545	19717	18058	37278	22362	13701	16307	23363	18685	8393	7183	21778	18012	27189	28295	20671	18692	14100	21655	15555	10917	17399	20364	14882	19005	20135	21428	12050	20769	16578	26090	19638	20107	12629	23053	23872	17821	21535	21509
Bladder_cancer	3	775	47	199	345	1250	124	161	370	80	208	329	15919	5945	159	90	7	42	536	191	1053	157	8655	331	132	56	1285	548	786	151	1	373	235	304	1660	40	46	785	779	44	229	193	516	104	227	195	245	2	89
Butanoate_metabolism	114136	160877	140796	194018	142076	137960	171090	96077	161004	105963	143788	123741	813127	438569	123862	114904	125463	119211	138057	95192	120276	127227	479444	188272	177662	128935	146890	138957	186956	141366	95483	106924	128655	137244	215556	111216	136121	136161	161236	125807	158710	143739	139597	109915	164430	163628	149346	114646	163728
Butirosin_and_neomycin_biosynthesis	17321	16159	12766	22317	14793	13378	24553	12155	19418	14525	18806	17059	25167	24257	12491	15364	17579	22867	20060	13013	9785	16379	22542	18656	26529	14617	16880	11850	18156	11463	13332	16970	17221	17353	21651	15311	23832	14503	16842	12184	22434	19857	17972	11560	17701	18547	20602	14426	20573
C5-Branched_dibasic_acid_metabolism	63447	79740	54323	100135	72391	60481	92714	46249	77185	50174	76834	63782	281462	179384	62452	63151	70896	63834	73701	42039	43597	61359	179875	94785	86473	68554	70903	79705	100724	84888	45429	55656	60910	77805	91926	57031	85674	63939	81601	74252	76253	72555	73723	57685	80061	81807	79371	56665	86714
CAM_ligands	0	0	0	0	0	0	0	0	0	0	0	0	0	0	0	0	0	0	0	0	0	0	0	0	0	0	0	0	0	0	0	0	0	0	0	0	0	0	0	0	0	0	0	0	0	0	0	0	0
Caffeine_metabolism	0	2	6	16	0	1	0	0	240	32	0	287	2	1	0	33	0	402	276	14	6	0	4	26	193	4	17	2	38	17	0	3	12	2	2	1	4	0	1	0	371	1	80	7	17	9	47	6	352
Calcium_signaling_pathway	0	0	0	0	0	0	0	0	0	0	0	0	0	0	0	0	0	0	0	0	0	0	0	2	0	0	0	0	0	1	0	0	0	0	2	0	0	0	0	0	0	0	0	0	1	0	0	0	0
Caprolactam_degradation	1556	8162	2069	7292	3419	11128	3326	2331	7188	1629	2777	4514	144811	57000	3325	2996	1371	2365	6549	2656	9562	4361	75531	6814	3308	3663	8121	9479	7394	6867	1089	4067	4647	3852	15876	1042	1028	7499	6843	3921	4986	3872	3156	4591	6402	3653	3436	789	4244
Carbohydrate_digestion_and_absorption	5672	3771	725	5011	3531	2577	3791	4793	3023	1000	1523	2189	32929	12717	1747	6709	3411	2860	5405	6731	7666	3407	18240	3082	9928	2524	3842	5538	2601	4867	5355	2333	2080	7114	8383	1805	6738	6775	3007	4203	2637	2911	3716	4832	1680	2089	4330	1079	2913
Carbohydrate_metabolism	35715	58230	24040	66751	45547	43582	65250	26059	36122	31202	42275	41172	225882	134050	42085	32744	38173	64748	49135	24654	23434	34771	135270	53737	61558	33349	33925	32621	56574	31040	26374	34283	42840	38841	61084	43963	57564	39098	47736	36680	59176	43019	42622	27215	43317	47317	47820	46803	46456
Carbon_fixation_in_photosynthetic_organisms	158427	176380	117356	207002	179389	143858	199202	137320	154798	121708	161030	140233	522211	366639	144444	147166	156578	136991	156742	133908	142144	132615	354802	201390	199588	139428	142345	144452	203561	144365	138423	127376	144340	151569	196802	140190	165176	166533	171901	143318	169373	157298	153679	131163	164805	170533	174094	148641	169275
Carbon_fixation_pathways_in_prokaryotes	244091	255316	241232	321339	262490	227220	284663	214479	255207	210565	244230	219947	814748	482637	215234	227118	222661	242607	265950	230324	229859	198024	510183	271068	279116	206500	221393	209104	301825	212504	222049	198571	245536	264413	315832	223749	280229	268177	258787	209228	263732	246491	247013	211490	256691	267543	255864	232528	268450
Cardiac_muscle_contraction	0	63	54	322	12	23	3	0	336	495	0	846	59	47	363	95	3	3	124	114	72	30	31	858	168	32	790	18	147	205	6	61	486	204	9	30	24	3	129	0	0	2	12	309	658	1372	51	35	3
Carotenoid_biosynthesis	137	811	44	334	61	159	69	51	955	188	490	468	105	474	41	587	79	1034	475	153	49	43	56	1311	4964	131	1094	128	249	277	134	672	123	528	1638	214	84	42	82	54	670	211	363	416	906	419	251	176	1102
Cell_cycle	0	0	0	0	0	0	0	0	2	0	0	0	1	0	0	0	0	0	0	0	0	0	0	0	0	0	2	0	0	0	0	1	0	6	0	0	0	0	2	0	1	0	58	0	0	9	3	0	575
Cell_cycle_-_Caulobacter	128033	120548	90336	159417	135472	90800	141698	109725	115066	90661	117103	101667	257705	189626	98409	119629	120970	94265	114978	103996	106844	88444	206370	152003	128209	106129	107125	115777	160062	125462	111962	92318	105643	121302	130845	98126	128339	129952	133839	112534	118139	122021	118394	108258	129096	130909	135504	99013	123246
Cell_cycle_-_yeast	0	0	0	0	0	0	0	0	0	0	0	0	0	0	0	0	0	0	0	0	0	0	0	0	0	0	0	0	0	0	0	0	0	0	0	0	0	0	0	0	0	0	0	0	0	0	0	0	0
Cell_division	21153	21155	21042	23890	22896	21053	21365	15988	17499	19982	20530	16794	72344	38808	18382	17333	16060	17289	19862	19680	19461	13373	45085	20957	19817	15640	18206	14058	26323	13842	19085	17257	20839	18576	24701	20556	22051	24447	22195	15099	19745	17318	19707	16495	21088	21549	20649	21095	17853
Cell_motility_and_secretion	37316	48618	52034	44102	45786	48261	44508	36627	40370	41143	44641	45250	197212	127908	49000	40580	38739	51828	47317	37389	39353	41479	117894	51431	44998	48757	47846	59537	49574	61018	34357	38316	45157	39831	57854	41226	37150	44061	49238	53498	51553	39117	42229	44216	46115	48482	43302	44276	43757
Cellular_antigens	17666	16952	18769	11220	16731	19755	13261	18327	8018	18145	13090	15529	54482	26196	16733	15104	11984	18011	16320	23097	21563	10226	29210	11918	14853	10757	13060	7778	11600	5766	19188	15576	16050	11642	19179	18527	14996	22169	13294	10723	14081	9158	15119	15626	13614	14569	12575	22177	9346
Chagas_disease_(American_trypanosomiasis)	4	794	52	225	174	1252	124	130	876	114	220	625	16013	5999	169	134	14	467	875	227	1082	248	9131	463	337	66	483	580	841	176	2	395	411	298	1663	43	55	785	575	37	602	195	257	131	175	209	290	12	400
Chaperones_and_folding_catalysts	259270	282171	210232	307013	276394	244728	286700	232898	225130	213074	247069	227098	882479	498499	222377	237696	240402	220998	263669	247317	249984	174241	571656	275735	298697	194755	217334	196788	309719	190423	239412	212777	240409	248125	318014	235561	269726	295518	266807	209096	257960	240941	244593	212379	250289	265636	281454	255927	242818
Chloroalkane_and_chloroalkene_degradation	28099	47764	24131	58167	36063	31857	50558	17064	45595	24062	38136	33415	147430	106637	33637	25593	24993	34485	36963	15044	20236	31393	99264	53485	60063	29365	33642	28154	46308	28471	19485	26711	33637	39061	48958	30503	44629	28096	38353	28536	39732	35683	37035	21778	40049	40226	34624	32603	47824
Chlorocyclohexane_and_chlorobenzene_degradation	1291	2126	1652	1322	1516	2394	2428	444	2194	902	1735	1835	22792	12877	1217	1086	574	2042	1626	1137	2088	3577	11675	3933	1504	1382	3020	1541	2073	1229	724	1601	950	718	3286	886	377	1665	1318	403	2679	1384	1153	1220	3297	1671	1001	621	2197
Cholinergic_synapse	0	0	0	0	0	0	0	0	0	0	0	0	0	0	0	0	0	0	0	0	0	0	0	0	0	0	0	0	0	0	0	0	0	0	0	0	0	0	0	0	0	0	0	0	0	0	0	0	0
Chromosome	381000	398049	274837	487540	406949	307704	430647	336733	360347	274447	368287	310808	1149026	706283	306087	360220	371894	291225	360925	330464	346628	271335	780561	449918	453540	302530	313756	328336	481198	334862	341164	284691	326988	380879	454084	306165	403842	409821	398887	325807	365749	378101	353498	317425	378520	391210	437222	324513	377792
Chronic_myeloid_leukemia	0	0	0	0	0	0	0	0	0	0	0	0	0	0	0	0	0	0	0	0	0	0	0	0	0	0	0	0	0	0	0	0	0	0	0	0	0	0	0	0	0	0	0	0	0	0	0	0	0
Circadian_rhythm_-_plant	0	4	1	6	0	0	0	0	241	32	0	286	1	1	0	35	0	402	275	15	1	0	0	32	219	1	88	0	39	28	0	10	3	4	2	0	4	0	1	0	371	1	80	26	152	15	46	7	352
Citrate_cycle_(TCA_cycle)	153847	165707	182006	181682	159390	164049	170365	137657	158017	147283	153794	152191	632931	357864	147006	149224	133947	173437	169034	162079	165645	128025	358958	161306	191336	132650	144872	136781	168122	132165	146644	135512	160394	164482	219631	148216	164262	178838	155887	135183	169719	138934	156467	140485	158256	172986	152747	160693	169466
Clavulanic_acid_biosynthesis	0	0	0	0	0	0	0	0	0	0	0	0	0	0	0	0	0	0	0	0	0	0	0	0	2	0	0	0	0	0	0	0	0	0	0	0	0	0	0	0	0	0	0	1	0	0	0	0	0
Colorectal_cancer	0	15	6	18	0	2	0	1	3	155	0	276	8	3	118	23	0	0	12	19	6	2	0	138	56	10	226	5	45	97	0	25	20	4	3	2	1	1	42	0	0	1	0	150	495	480	10	4	1
Complement_and_coagulation_cascades	0	0	0	0	0	0	0	0	0	0	0	0	0	0	0	0	0	0	0	0	0	0	0	0	0	0	0	0	0	0	0	0	0	0	0	0	0	0	0	0	0	0	0	0	0	0	0	0	0
Cyanoamino_acid_metabolism	73232	80788	64760	88694	75884	71602	95906	53656	58447	82830	89609	74766	238868	155822	74648	64826	82931	130409	77917	59873	49521	68327	141414	91464	73455	73874	74350	54059	98349	55296	61009	79320	93776	65381	100602	85878	94423	75311	91025	54761	118899	88082	74900	53335	89599	95296	94179	78643	70002
Cysteine_and_methionine_metabolism	217102	243772	173342	294685	239635	195738	251933	189894	216196	161894	225367	184783	858291	505571	180346	200134	213755	188225	208100	187119	202610	174831	575582	277953	270150	177000	201403	186786	281650	183125	189590	176059	193873	229338	287274	182946	214438	238900	246819	179252	237645	223951	219745	177883	230586	241452	255244	186692	237090
Cytochrome_P450	0	0	0	0	0	0	0	0	0	0	0	0	0	0	0	3	0	0	0	0	0	0	0	0	8	0	2	0	0	1	0	0	0	0	0	0	0	0	0	0	0	0	0	2	10	0	0	0	0
Cytokine_receptors	0	0	0	0	0	0	0	0	0	0	0	0	0	0	0	0	0	0	0	0	0	0	0	0	0	0	0	0	0	0	0	0	0	0	0	0	0	0	0	0	0	0	0	0	0	0	0	0	0
Cytokine-cytokine_receptor_interaction	0	0	0	0	0	0	0	0	0	0	0	0	0	0	0	0	0	0	0	0	0	0	0	0	0	0	0	0	0	0	0	0	0	0	0	0	0	0	0	0	0	0	0	0	0	0	0	0	0
Cytoskeleton_proteins	84205	95045	49522	134484	90678	54774	112973	70822	86913	54484	88886	66856	125005	112545	66060	80230	92200	57003	84073	58735	54937	51774	107240	109981	125086	68143	69941	72548	114608	79483	68388	61766	71194	92475	92802	66962	113704	78039	90436	78169	82655	95302	81718	66280	91181	92507	110243	71538	98603
Cytosolic_DNA-sensing_pathway	0	0	0	0	0	0	0	0	0	0	0	0	0	0	0	0	0	0	0	0	0	0	0	0	0	0	0	0	0	0	0	0	0	0	0	0	0	0	0	0	0	0	0	0	0	0	0	0	0
D-Alanine_metabolism	23522	24621	15908	30172	24751	18866	27326	21489	24895	16011	22657	19443	75595	46177	17928	22604	23457	17338	21396	19024	21896	15442	54358	29634	27823	20286	20975	23331	30075	23826	20808	18370	19817	21631	27846	17133	25366	24595	26196	21462	22379	24499	21796	20282	24906	24035	26857	17290	24524
D-Arginine_and_D-ornithine_metabolism	891	520	47	203	1359	479	1386	924	204	228	409	652	552	3411	1474	1240	972	20	49	113	161	760	453	1732	223	2545	1298	4296	455	4838	557	136	253	494	100	255	68	149	1250	3428	396	1124	137	2064	1271	595	730	193	150
D-Glutamine_and_D-glutamate_metabolism	34590	39059	28409	44648	39496	31152	40864	32631	34932	26903	37251	32124	94207	61327	30527	32712	33860	34642	35175	31131	32498	27509	66451	41782	44414	27695	31082	28280	45768	29250	31203	27623	33403	35721	43084	32429	34695	37637	38482	31101	38544	37101	36488	29413	36252	39628	40722	36510	39582
DNA_repair_and_recombination_proteins	664775	694861	495769	864437	718032	532839	757415	587881	659864	491725	654515	560355	1887090	1200468	538582	623763	637456	549425	639322	568964	595352	506320	1342177	809851	805359	542030	575537	573198	857820	590754	594917	507083	582329	672354	794236	546480	696180	704078	715772	558496	665260	674888	640710	554736	674167	704390	734053	564984	701277
DNA_replication	159009	166092	119500	212472	166170	126622	176807	140565	157866	124846	154452	136382	366423	246694	134303	151376	152225	128332	155605	136753	137361	118703	275199	178823	184410	136159	135678	145275	192762	150436	143925	125592	139683	164773	178792	134680	173673	165646	169302	143390	153168	160609	155002	138631	160913	167896	171344	142003	166021
DNA_replication_proteins	303089	319630	218997	400708	318355	238905	336281	268383	289826	236161	299142	253872	719154	484719	249880	281279	294698	237465	290472	263441	262801	223953	520843	344191	351686	247936	248289	250422	369874	256011	274336	242486	266828	306652	345337	256379	321166	317192	318865	249773	291453	297147	287016	250156	306621	315900	329488	268058	309482
Dilated_cardiomyopathy_(DCM)	0	0	0	0	0	0	0	0	0	0	0	0	0	0	0	0	0	0	0	0	0	0	0	0	0	0	0	0	0	0	0	0	0	0	0	0	0	0	0	0	0	0	0	0	0	0	0	0	0
Dioxin_degradation	9770	11995	2878	21024	11402	8611	19185	4757	13022	2703	9124	7701	87943	51427	4637	7064	6656	4649	11807	3313	9708	7488	51268	17810	18783	5363	6342	7072	19152	6723	5643	4161	8202	11556	19520	5245	20667	10510	12679	4859	8192	9945	8830	3813	10354	10789	10113	3943	13063
Drug_metabolism_-_cytochrome_P450	2485	11925	5849	7918	4981	12295	7388	2251	9202	5038	4516	6375	123184	48802	7383	3731	2294	6680	9773	3407	7339	2335	66988	9059	17714	3461	8313	5380	7267	3368	2331	4904	7299	5081	17786	5841	10466	8065	7070	4767	5931	3407	5201	4116	8296	4848	5638	7672	7568
Drug_metabolism_-_other_enzymes	85920	85670	58077	105922	91505	68284	95798	77602	76823	66117	86581	71057	208969	160210	68756	74717	80419	71026	79868	76507	75599	67352	140313	102343	88181	69040	71849	63305	101568	62388	76588	69718	74106	78918	94267	72495	91260	88442	87586	60597	82505	82658	79900	66429	84218	84961	87308	73287	83085
ECM-receptor_interaction	0	0	0	0	0	0	0	0	0	0	0	0	0	0	0	0	0	0	0	0	0	0	0	0	0	0	0	0	0	0	0	0	0	0	0	0	0	0	0	0	0	0	0	0	0	0	0	0	0
Electron_transfer_carriers	1642	8349	6155	6938	3938	9723	3550	2429	6944	2233	4346	4417	118968	56175	3940	2069	1208	2523	5244	2529	9622	7495	62989	7358	6404	2783	3812	6527	7568	2782	1453	4745	4033	6081	15774	1741	1168	6863	6070	1106	3680	3360	3364	1243	2862	4661	3966	918	7234
Endocrine_and_other_factor-regulated_calcium_reabsorption	0	0	0	0	0	0	0	0	0	0	0	0	0	0	0	0	0	0	0	0	0	0	0	0	0	0	0	0	0	0	0	0	0	0	0	0	0	0	0	0	0	0	0	0	0	0	0	0	0
Endocytosis	0	0	0	0	0	0	0	0	0	0	0	0	0	0	0	3	0	0	0	0	0	0	0	5	9	0	9	0	0	0	0	1	0	0	0	0	0	0	0	0	0	0	0	3	6	2	0	0	0
Energy_metabolism	208819	240564	183964	299824	225344	206904	265806	184459	235847	175130	228723	200852	827135	480284	178786	186453	201505	206843	238036	189647	197001	178499	516510	247767	253320	162797	194294	156491	273152	146826	184248	186488	217067	235219	290664	199615	252728	232840	231524	159133	232332	217986	221307	163323	215560	234360	237385	207823	245601
Epithelial_cell_signaling_in_Helicobacter_pylori_infection	23107	20919	14638	28087	21920	16728	25195	18799	21695	14913	21593	17629	73574	38007	16004	21965	21571	17653	20769	19054	19852	14258	47307	23928	24655	18106	18297	21272	26970	22157	19617	15459	18313	21212	26735	17021	24991	24336	23162	20735	21276	22040	20981	19368	21725	21431	23835	17665	24171
ErbB_signaling_pathway	0	0	0	0	0	0	0	0	0	0	0	0	0	0	0	0	0	0	0	0	0	0	0	0	0	0	0	0	0	0	0	0	0	0	0	0	0	0	0	0	0	0	0	0	0	0	0	0	0
Ether_lipid_metabolism	167	480	56	468	436	55	272	71	165	216	590	124	27	3083	570	214	95	251	133	112	166	721	770	1826	456	621	732	452	264	497	62	651	167	72	65	102	24	71	182	116	115	79	203	255	484	318	129	33	380
Ethylbenzene_degradation	10380	13877	9009	14301	9876	11846	13815	8374	12903	11652	12586	9733	48617	27484	13166	10640	9222	12720	13094	10764	8618	16114	26196	11946	20438	13150	10866	13564	8818	13165	9958	9596	15072	12531	19084	12553	16214	11068	11030	13222	14255	12909	9607	11575	12844	10749	9246	12400	11683
Fat_digestion_and_absorption	0	0	0	0	0	0	0	0	0	0	0	0	0	0	0	0	0	0	0	0	0	0	0	0	0	0	0	0	0	0	0	0	0	0	0	0	0	0	0	0	0	0	0	0	0	0	0	0	0
Fatty_acid_biosynthesis	99947	126681	77853	160374	121541	95618	147955	88171	116077	76384	100507	95039	388105	244380	91521	94510	102846	104126	121556	77377	79881	94650	257351	132748	149826	86082	86536	90206	148368	93925	84557	79704	98789	123533	140413	92547	135393	107660	120063	94087	115352	115759	104674	82397	117307	119127	121186	97197	119975
Fatty_acid_elongation_in_mitochondria	0	2	0	4	0	0	0	0	240	32	0	286	0	0	0	29	0	402	273	12	0	0	0	0	176	0	0	0	38	0	0	0	2	0	2	0	4	0	1	0	371	1	80	0	0	4	45	6	352
Fatty_acid_metabolism	39221	63201	41991	66725	52719	59734	58613	38755	63781	36496	51687	46416	421975	200418	42033	37605	43846	43750	55630	34946	49110	45963	248365	68521	68688	37726	55994	40091	72312	35451	33164	40148	50343	51202	87008	41230	47748	54274	59307	33808	53812	50743	49737	35698	57976	54653	51426	43848	55734
Fc_epsilon_RI_signaling_pathway	0	0	0	0	0	0	0	0	0	0	0	0	0	0	0	0	0	0	0	0	0	0	0	0	0	0	0	0	0	0	0	0	0	0	0	0	0	0	0	0	0	0	0	0	0	0	0	0	0
Fc_gamma_R-mediated_phagocytosis	0	0	0	0	0	0	0	0	0	0	0	0	0	0	0	3	0	0	0	0	0	0	0	5	9	0	9	0	0	0	0	1	0	0	0	0	0	0	0	0	0	0	0	3	6	2	0	0	0
Flagellar_assembly	66409	61154	8909	104845	57588	51515	110738	26948	126362	18053	74223	67890	385065	205484	53680	70786	84540	24872	78555	28352	36321	35163	235660	95575	48536	74643	55663	127091	107333	143178	37644	23048	65165	83875	78565	26255	119025	55965	73738	115888	60600	79926	54610	66249	64401	67853	121475	22630	80868
Flavone_and_flavonol_biosynthesis	937	1388	302	1250	629	1003	1407	1180	1722	1078	2720	2085	1301	456	887	1175	2180	2236	2385	1415	102	1132	1243	907	1503	593	1700	358	1461	251	532	1229	2673	576	1870	2390	514	702	988	569	3411	2625	1403	536	1558	1846	3336	1860	1057
Flavonoid_biosynthesis	233	849	376	779	156	50	204	64	1001	210	542	683	544	484	179	555	232	846	523	164	28	1991	51	1251	4835	265	759	212	424	107	306	713	474	990	1982	118	301	158	133	108	903	287	433	333	566	414	501	234	1261
Fluorobenzoate_degradation	3	1122	119	434	174	2069	263	202	1247	188	291	916	28664	11943	166	313	10	850	1195	560	2399	275	13079	810	708	98	1126	1034	901	350	1	414	366	313	3450	104	84	1371	809	37	1369	207	344	379	1124	298	479	61	748
Focal_adhesion	0	0	0	0	0	0	0	0	0	0	0	0	0	0	0	0	0	0	0	0	0	0	0	0	0	0	0	0	0	0	0	0	0	0	0	0	0	0	0	0	0	0	0	0	0	0	0	0	0
Folate_biosynthesis	99211	99787	85075	102577	106270	92987	101556	88808	76240	81309	87254	84542	335191	185099	84004	92444	86801	86734	92609	91586	98600	76336	223480	102038	96237	82060	88442	82289	118216	82385	90975	77642	90164	95120	114902	86670	92346	112920	106895	82932	101715	86839	95508	85356	99013	97796	97470	90499	87421
Fructose_and_mannose_metabolism	218205	281492	159916	320941	242496	226735	321097	170353	198555	184509	221998	210699	868023	663396	243618	205722	210190	206201	246117	163498	187645	219338	588914	292622	312063	233270	197954	242084	265613	233892	173931	192872	209754	211340	293510	217136	265231	222461	248683	237914	266099	239698	221693	188268	244743	257140	235459	224425	245500
Function_unknown	245874	357209	240264	365885	294931	334320	332519	212072	284774	224409	285184	275538	2023781	1001829	271665	247392	250234	303062	317975	217336	281114	246141	1184164	345213	356064	244910	266841	295817	383577	274328	210712	245740	281868	288173	450067	255291	304388	322024	334385	268481	333923	278190	278016	227819	293623	310590	320170	270681	312339
G_protein-coupled_receptors	0	0	0	0	0	0	0	0	0	0	0	0	0	4	0	0	0	0	0	1	11	3	0	242	23	0	2	0	0	0	0	0	0	0	2	0	0	9	0	0	1	0	0	0	0	1	0	1	0
GTP-binding_proteins	0	0	0	0	0	0	0	0	0	0	0	0	0	0	0	0	0	0	0	0	0	0	0	0	0	0	0	0	0	0	0	0	0	0	0	0	0	0	0	0	0	0	0	0	0	0	0	0	0
Galactose_metabolism	172756	246871	127409	267741	202380	191938	258189	138036	157901	168027	194488	187667	597386	416523	204622	162821	189131	251431	221050	133930	122813	177872	448161	209835	259917	183075	167610	178805	232640	180022	138204	185550	195454	180340	233930	208278	224666	178731	216702	199987	248957	194195	187294	148063	210882	214226	218270	217933	185130
Gastric_acid_secretion	0	0	0	0	0	0	0	0	0	0	0	0	0	0	0	0	0	0	0	0	0	0	0	0	0	0	0	0	0	0	0	0	0	0	0	0	0	0	0	0	0	0	0	0	0	0	0	0	0
General_function_prediction_only	826413	954113	689753	1115594	952791	786147	1040878	712646	837377	662644	885320	778692	3036442	1914837	741579	757783	799379	827361	889092	703302	741510	723376	2012965	1069091	1010065	703179	779643	719023	1155478	725650	720506	710275	794809	882595	1070673	760564	924355	900722	942610	717705	924757	870602	852178	680959	901405	942307	977712	794772	926813
Geraniol_degradation	9193	17064	11914	12069	11317	23304	10970	8863	13111	12832	11709	13676	180361	72921	12469	9614	6989	13253	16323	12490	18522	11068	93507	12887	11167	10295	17684	13530	14323	10297	9027	13359	17007	12405	28400	11949	10429	17058	14692	9565	14326	10101	11088	12023	14557	11807	10412	13250	9146
Germination	8390	7679	433	14569	10615	2130	11459	4547	10625	1943	10964	5946	2998	12673	3625	5618	8541	2221	5079	1856	2247	2260	4239	16762	10360	4872	3953	3371	16014	5648	5695	2968	5943	12051	9164	3662	8042	6061	8827	4196	7862	9529	6592	3001	8837	9938	13347	2895	10316
Glioma	0	0	0	0	0	0	0	0	0	0	0	0	0	0	0	0	0	0	0	0	0	0	0	0	0	0	0	0	0	0	0	0	0	0	0	0	0	0	0	0	0	0	0	0	0	0	0	0	0
Glutamatergic_synapse	25488	32591	22202	35172	33176	27769	35280	21654	23448	23054	30154	26717	51265	38829	24444	21647	23121	29564	30872	22537	19133	19805	37630	31650	36228	18522	23138	15871	38679	17334	22724	23909	28952	28098	30857	28467	29804	27315	28697	22678	31901	27861	27769	20060	29557	31380	31679	32332	28979
Glutathione_metabolism	42626	58071	38565	55429	54008	62048	47935	44994	43967	36579	43138	46182	400464	168327	43201	42779	38684	43462	52986	48928	59916	35482	230238	52317	51858	33016	47757	43125	61621	38023	42622	39499	46228	48173	76064	43608	41647	63929	53677	41590	49414	45083	45152	42373	48428	49268	51865	49761	40131
Glycan_bindng_proteins	0	0	0	0	0	0	0	0	0	0	0	0	0	0	0	0	0	0	0	0	0	0	0	0	0	0	0	0	0	0	0	0	0	0	0	0	0	0	0	0	0	0	0	0	0	0	0	0	0
Glycan_biosynthesis_and_metabolism	7981	10578	14209	9346	7247	14681	9024	8977	11848	8784	9611	8751	125347	49036	7642	8633	6613	9669	12348	10927	15427	4674	69202	6730	10065	6353	10192	10379	10136	7369	8108	8740	11612	10199	21178	8323	12757	14195	10154	6834	8913	9031	9008	7951	6814	8447	7881	8184	9573
Glycerolipid_metabolism	69793	91415	47989	143078	81350	62408	108978	50522	94759	48200	80560	68321	311917	218570	65198	70970	75269	73387	81301	43068	52202	71809	203315	114779	112844	72398	76994	90309	109154	93455	49764	62576	62579	82043	108608	55097	92080	68581	89086	80522	86905	86888	79260	60250	85793	88539	92768	54119	98257
Glycerophospholipid_metabolism	111963	130897	101265	170448	131798	109048	145457	95144	129492	90719	134452	110812	477120	282357	89703	103702	127205	115548	123018	84217	93940	102499	310671	161512	140857	94547	111685	96494	185972	98776	90910	103926	108255	123263	159707	95656	126180	122287	141032	90754	133782	125973	121310	84208	135557	138953	149662	94876	131262
Glycine,_serine_and_threonine_metabolism	189583	216414	159053	243578	219632	185445	220998	169004	189142	156245	199868	174710	772341	467643	169255	178555	190784	177033	190590	163736	177121	150282	494963	250931	230814	168895	182551	175191	256964	178856	166374	157924	176283	195557	262161	169077	181736	211345	221356	168754	208226	197387	194319	161528	216491	214054	221135	177410	202700
Glycolysis_/_Gluconeogenesis	231512	295698	175246	347431	266042	230123	320813	196597	267784	188379	260201	224466	1015040	648558	225627	220815	244828	221532	260884	180457	199825	212230	684288	322850	362392	219112	227223	220370	323833	217812	193159	200552	234972	252809	343725	222879	284683	247324	278493	218853	282357	261726	249700	189831	271033	277505	289531	230454	292460
Glycosaminoglycan_biosynthesis_-_chondroitin_sulfate	0	0	0	0	0	0	0	0	0	0	0	0	0	0	0	0	0	0	0	0	0	0	0	0	0	0	0	0	0	0	0	0	0	0	0	0	0	0	0	0	0	0	0	0	0	0	0	0	0
Glycosaminoglycan_degradation	28506	45826	33546	34953	36912	45685	36907	25274	20874	43149	38023	44605	27283	28972	44735	22366	20645	50508	57817	36865	18801	31651	11979	13514	42431	24502	26804	13057	26136	11409	28081	41003	41111	37756	35617	53506	35567	32248	29574	30914	42604	28016	38042	25193	30716	36404	32815	66458	23221
Glycosphingolipid_biosynthesis_-_ganglio_series	24031	33707	27247	26045	29146	35473	26425	20869	13493	33904	26745	30985	21822	21686	34043	17963	15502	33988	40043	30222	17427	22885	9820	10388	30240	19345	19698	10440	18246	8815	24144	31151	29942	30177	25835	38594	28040	27125	22161	22730	28820	19587	27173	20676	22960	26077	22115	47646	15528
Glycosphingolipid_biosynthesis_-_globo_series	40484	52851	36911	51613	44372	48046	47608	31412	30682	46962	44330	47757	51738	48984	49213	33116	30517	59599	59997	43175	26071	37807	27847	28373	52758	33113	32759	25899	35404	24716	36235	47079	43176	49490	44040	52931	51698	42107	37824	39617	46302	35358	43872	33645	38095	43363	41810	63458	32509
Glycosphingolipid_biosynthesis_-_lacto_and_neolacto_series	259	149	186	67	33	128	98	22	10	116	120	266	48	36	19	79	58	445	292	184	2	281	1	2	31	75	144	78	68	3	72	635	53	44	254	198	29	36	133	30	399	72	154	120	141	98	425	53	25
Glycosylphosphatidylinositol(GPI)-anchor_biosynthesis	0	0	0	0	0	0	0	0	0	0	0	0	0	0	0	0	0	0	0	0	0	0	0	0	0	0	0	0	0	0	0	0	0	0	0	0	0	0	0	0	0	0	0	0	0	0	0	0	0
Glycosyltransferases	81223	98682	72585	88273	94471	93944	87332	78197	69310	67778	82353	79830	417354	206088	78957	82965	74006	82457	85183	84179	91532	62730	247597	85953	100104	67591	78827	80429	98834	78137	78907	66635	83566	80060	117813	78715	70349	101282	89568	84279	92909	82562	80160	76705	80268	85370	91794	90254	77210
Glyoxylate_and_dicarboxylate_metabolism	101293	144439	110059	158186	130670	128188	147856	86526	117003	94988	124891	112918	576284	337844	109975	99481	116832	117111	129331	77243	95141	94241	357017	159591	155753	103075	129086	109942	174569	112398	79382	106481	112034	120573	169874	106800	119661	113942	143909	106831	138447	121724	125692	90597	138840	141183	142111	110528	126366
GnRH_signaling_pathway	0	0	0	0	0	0	0	0	0	0	0	0	0	0	0	3	0	0	0	0	0	0	0	5	9	0	9	0	0	0	0	1	0	0	0	0	0	0	0	0	0	0	0	3	6	2	0	0	0
Hedgehog_signaling_pathway	0	0	0	0	0	0	0	0	0	0	0	0	0	0	0	0	0	0	0	0	0	0	0	0	0	0	0	0	0	0	0	0	0	0	0	0	0	0	0	0	0	0	0	0	0	0	0	0	0
Hematopoietic_cell_lineage	0	0	0	0	0	0	0	0	0	0	0	0	0	0	0	0	0	0	0	0	0	0	0	0	6	0	2	0	0	0	0	0	0	0	0	0	0	0	0	0	0	0	0	1	0	0	0	0	0
Hepatitis_C	0	0	0	0	0	0	0	0	2	0	0	0	1	0	0	0	0	0	0	0	0	0	0	0	0	0	2	0	0	0	0	1	0	6	0	0	0	0	2	0	1	0	58	0	0	9	3	0	575
Histidine_metabolism	130309	169774	131037	220109	156031	143677	200534	101703	162241	132921	175817	149411	359534	244551	136340	127035	145384	165732	178171	98847	90179	107942	265960	175439	191933	129862	146210	124879	207433	138644	103962	135719	160738	169816	189652	151030	193395	130071	168972	143233	179930	165432	162897	113952	169438	177941	172023	161148	180538
Homologous_recombination	228003	232461	165509	289439	240401	176297	259135	199055	226791	169525	220970	189934	532263	355018	184794	215079	215728	181754	218185	195315	198679	164883	399088	262231	270528	187052	192131	198360	284056	207065	205477	169032	197367	231444	257832	187878	253132	237153	238929	199229	218513	229362	218338	193688	225614	236729	248918	199292	236680
Huntington's_disease	3454	8030	7210	8980	5756	9681	6586	4409	7648	8419	7845	9596	51288	27748	7462	3875	4628	8564	7920	4434	5500	4987	26719	7482	5464	5066	7333	4129	6559	3445	3295	7126	8636	6339	12222	7386	5816	5463	7376	3386	7313	6204	5779	3608	6647	9266	5128	8319	5888
Hypertrophic_cardiomyopathy_(HCM)	0	4	3	8	0	1	0	0	4	0	0	3	8	9	2	6	0	1	15	4	5	0	3	115	10	5	79	0	0	16	0	6	41	4	0	1	1	0	0	0	0	0	0	22	25	7	0	0	0
Indole_alkaloid_biosynthesis	2	0	0	0	0	0	0	0	6	0	0	0	0	0	0	0	0	0	0	0	0	0	0	2	1	0	8	0	0	6	0	2	0	0	0	0	0	0	7	0	0	0	0	2	7	1	0	0	0
Influenza_A	0	15	6	18	0	2	0	1	5	155	0	276	9	3	118	23	0	0	12	19	6	2	0	138	56	10	228	5	45	97	0	26	20	10	3	2	1	1	44	0	1	1	58	150	495	489	13	4	576
Inorganic_ion_transport_and_metabolism	36030	65876	49011	56800	48955	70195	49947	34946	42495	43144	45180	49192	445095	218168	48075	33719	36166	66979	58571	39680	50626	43207	248658	50210	60276	33366	46669	37803	57082	27282	32025	46602	57951	48455	84926	49323	39490	56114	52668	31537	65588	41990	42528	29958	46421	48076	44531	48602	40488
Inositol_phosphate_metabolism	17991	26141	22812	25240	21132	28987	27970	16083	23058	20921	24087	23828	202046	104210	23013	18705	19716	23745	23886	17036	23422	16863	107546	26513	28155	22201	23247	23076	23782	19777	15426	20396	25021	18989	41523	22335	22661	25419	24157	19702	31230	22710	21195	16892	24586	25605	20019	22749	26153
Insulin_signaling_pathway	18905	26324	11011	34182	21800	17091	31178	14243	19375	12464	19034	17074	56825	40403	17418	17969	19160	18355	27222	13564	12300	15981	40764	24117	37007	14448	18243	16986	27418	17674	14555	16440	19197	23952	25046	18416	34518	18235	20195	19870	20646	19451	20620	14712	19236	19436	22909	18923	23401
Ion_channels	1582	2528	2138	1756	1431	3249	2480	1003	2805	2069	2810	2670	33193	16706	2908	2895	2117	3021	3998	1946	2590	5572	22157	2520	1834	3843	5237	5742	3479	5206	926	3015	3797	1341	5940	3323	2122	2626	3364	4377	5368	3551	4092	2892	2788	2875	4368	2654	4539
Isoflavonoid_biosynthesis	0	2	2	8	0	1	0	0	4	0	0	3	8	8	2	1	0	1	15	4	5	0	3	38	4	5	12	0	0	0	0	2	41	4	0	1	1	0	0	0	0	0	0	0	2	0	0	0	0
Isoquinoline_alkaloid_biosynthesis	16294	15012	15905	15446	16712	15007	13834	15729	12813	13408	14442	13665	61138	31686	14083	15466	15345	15502	13338	17036	18293	12717	37991	16722	12210	14416	15241	15716	17647	15703	15372	12743	13503	12714	18494	13927	11206	19130	17190	14889	16402	11720	15976	15548	16244	16377	15636	14684	14956
Leishmaniasis	0	0	0	0	0	0	0	0	0	0	0	0	0	0	0	0	0	0	0	0	0	0	0	0	0	0	0	0	0	0	0	0	0	0	0	0	0	0	0	0	0	0	0	0	0	0	0	0	0
Leukocyte_transendothelial_migration	0	0	0	0	0	0	0	0	0	0	0	0	0	0	0	0	0	0	0	0	0	0	0	0	0	0	0	0	0	0	0	0	0	0	0	0	0	0	0	0	0	0	0	0	0	0	0	0	0
Limonene_and_pinene_degradation	14466	24166	14012	28285	15460	22060	20682	11361	25198	15078	20179	16551	170025	80842	17999	15649	12924	17828	20068	14897	18790	23555	94478	24673	26650	19150	23867	23370	18183	21321	12768	15402	22014	20111	36371	15492	18828	19318	19608	18223	22659	19666	16791	17948	23040	17868	14523	15192	21445
Linoleic_acid_metabolism	12296	21891	14143	20819	16512	15524	24680	7557	12673	14891	15650	16956	16711	29568	18935	11756	13269	20232	16306	7124	5850	16778	15237	22181	25695	16031	14016	11838	18435	13162	9024	14775	16376	12277	15841	17491	17886	10721	17377	15580	21613	16416	16311	10640	18482	20318	16057	19853	17174
Lipid_biosynthesis_proteins	129119	156575	111929	185949	153892	130920	174840	121701	146529	107237	139559	131511	515301	311461	119838	123649	138359	141635	150680	108906	111108	110669	330221	165359	184765	108761	119606	114230	185130	116651	112526	110035	132856	152475	184883	123403	160003	142292	153074	118918	147762	141427	135325	109333	147261	154798	158497	135422	146864
Lipid_metabolism	29474	36957	15779	43138	37345	28534	39835	27351	29775	16703	31226	25338	213457	103480	23457	27442	30966	27540	29035	23134	28893	19995	127384	42845	44294	19480	24142	24889	46346	24172	24602	17919	24645	35394	49110	23297	31814	36440	36508	24902	32819	31129	27005	21934	30994	33622	37133	25510	32119
Lipoic_acid_metabolism	5194	14742	14353	11068	9966	18060	11654	4344	9867	13818	12076	15186	52692	31868	13523	5425	5025	17539	15931	5859	5856	9792	28106	6933	15504	8665	9812	5696	9262	4682	5207	13160	12752	11744	15932	14107	10407	7710	10243	8381	12964	8344	10722	5591	10397	12140	7726	16885	9028
Lipopolysaccharide_biosynthesis	82239	72769	110138	51406	78769	98672	63640	86108	53449	88636	71496	83328	384528	174851	85243	84152	61200	106164	82636	102973	108711	78102	207044	57086	60646	79656	89708	93829	69115	87623	84766	73876	94950	64268	105620	83136	75449	102671	79153	84107	89216	66956	79100	88911	66572	76361	60247	89170	61252
Lipopolysaccharide_biosynthesis_proteins	98697	111796	133290	83306	102666	139703	94154	105618	76819	114012	100954	116185	663182	297543	113521	103956	80368	142363	113557	122147	135887	106850	356303	80649	90699	101998	118035	119934	96843	107111	100322	106052	133455	97307	157318	114493	96303	133775	109859	107902	130059	96045	106442	106711	91627	110680	85783	123434	85663
Long-term_depression	0	0	0	0	0	0	0	0	0	0	0	0	0	0	0	0	0	0	0	0	0	0	0	0	0	0	0	0	0	0	0	0	0	0	0	0	0	0	0	0	0	0	0	0	0	0	0	0	0
Long-term_potentiation	0	0	0	0	0	0	0	0	0	0	0	0	0	0	0	0	0	0	0	0	0	0	0	0	0	0	0	0	0	0	0	0	0	0	0	0	0	0	0	0	0	0	0	0	0	0	0	0	0
Lysine_biosynthesis	180913	210297	138962	269463	212554	151249	231371	150139	187955	141340	197811	162634	472286	355163	158336	167741	193658	160283	185203	130116	135204	138560	367306	252321	235929	163828	167062	164666	275690	179215	146633	148274	163419	196892	224556	158668	211080	181190	220106	164455	197178	198941	191282	147254	212134	215616	221686	161362	209350
Lysine_degradation	19687	35263	20847	38444	29412	36403	31175	19743	35942	18657	29814	28479	313890	141054	24612	22486	23081	26660	31793	20272	29305	29124	172268	39607	34097	24608	33868	34476	40015	32013	17061	22832	27056	28113	54586	21492	20558	32732	35141	27775	31779	28963	26757	25110	33752	31457	28597	24617	29306
Lysosome	39931	56250	47491	46267	49394	59066	49706	32074	29706	58359	53213	59643	34359	41277	55333	30206	27967	75204	70121	48864	23939	45932	16123	25896	54413	33755	39550	18745	40938	16951	37582	56959	57137	46422	47643	68524	47011	43234	40109	37489	61262	39496	49811	33012	43225	50116	44451	81033	32241
MAPK_signaling_pathway	0	0	0	0	0	0	0	0	0	0	0	0	0	0	0	0	0	0	0	0	0	0	0	0	0	0	0	0	0	0	0	0	0	0	0	0	0	0	0	0	0	0	0	0	0	0	0	0	0
MAPK_signaling_pathway_-_yeast	8520	15131	12696	16414	13810	14808	14878	8106	11543	14175	15018	13109	38735	28571	13650	8482	10730	13179	12966	5843	5323	12961	24453	14161	10932	12899	13990	10419	15330	11168	7039	13038	15482	16102	15676	14451	11301	9443	14980	11579	15858	13844	14092	8525	14431	15710	11336	15206	13339
Measles	0	0	0	0	0	0	0	0	2	0	0	0	1	0	0	0	0	0	0	0	0	0	0	0	0	0	2	0	0	0	0	1	0	6	0	0	0	0	2	0	1	0	58	0	0	9	3	0	575
Meiosis_-_yeast	154	48	2355	325	86	252	303	134	1278	815	555	772	519	525	297	308	111	3712	815	628	188	162	969	627	554	144	1408	133	723	307	223	516	1139	312	679	630	784	202	150	22	1399	285	777	392	1261	624	529	664	1343
Melanogenesis	0	0	1	0	0	0	0	0	0	0	0	0	0	0	0	1	0	0	0	0	0	0	0	3	0	0	6	0	0	1	0	0	2	0	0	0	0	0	0	0	0	0	0	1	2	1	0	0	0
Membrane_and_intracellular_structural_molecules	151458	186430	166903	145118	168498	205199	166568	147394	115484	160848	151686	164131	900886	426157	162718	139507	128990	181109	192430	175572	177393	130487	499209	135086	163522	114916	138995	110263	164794	90671	148886	149547	175918	142748	228580	177642	151077	201789	165846	123973	180032	136780	154835	131691	143624	166993	152065	201077	120437
Metabolism_of_cofactors_and_vitamins	23140	25413	28041	24807	22575	27840	25536	21302	23873	17378	23031	21955	197451	95159	19711	21878	20229	25973	23306	22215	31262	26490	114710	30961	26303	19060	23309	22673	28658	19889	19569	18373	20928	20557	41015	17819	19929	30175	26555	17101	28781	20839	22660	19757	23263	25941	23004	17223	27961
Metabolism_of_xenobiotics_by_cytochrome_P450	2487	11973	5846	7823	4966	12527	7399	2262	8945	5001	4603	6080	132818	51452	7320	3693	2294	6273	9467	3401	7390	2332	72740	8760	17465	3451	8262	5516	7222	3333	2331	4892	7091	5070	18465	5844	10462	8495	7309	4771	5583	3403	5098	4057	8075	4830	5590	7659	7210
Methane_metabolism	269302	322503	211943	420292	318589	245030	364809	206136	312395	209431	309414	253749	884123	610468	241460	237745	263435	251335	282598	193435	199923	231145	598396	382065	367283	232051	238871	215929	402004	226721	219668	218627	256672	297138	358052	242467	305336	276089	318370	225321	315801	303628	291538	201311	317556	326504	335290	257587	386957
Mineral_absorption	4470	637	1918	686	2318	295	570	3102	1711	369	1714	1004	881	3576	744	2892	360	1216	379	5555	6037	2088	3409	3426	498	895	915	1282	1226	837	4735	201	1274	1595	923	406	527	4776	332	247	1026	847	1521	3224	816	1442	1285	273	2324
Mismatch_repair	199733	207065	134692	270960	211197	151565	229225	172282	193551	145348	188369	163367	446624	314212	164217	188574	191837	155291	190004	165330	165564	142036	324825	230170	233791	166295	164046	178006	248161	187360	177515	146157	171532	200210	219064	163254	221313	205121	211309	178666	194554	203523	189561	168730	199871	206608	221240	170116	207394
N-Glycan_biosynthesis	7649	5132	6104	4447	6758	5883	6209	6758	5153	6286	6891	7049	12803	8785	5840	5929	4697	7926	5941	7956	7131	6053	8542	5952	4801	4866	5675	2998	4645	2337	7325	5349	6521	5847	6649	6738	5413	7698	5381	3549	7153	5695	6637	5559	5188	6077	4968	7224	6865
NOD-like_receptor_signaling_pathway	10987	13482	7953	15235	12836	10098	13614	9843	8626	8858	10336	9503	20599	16709	10446	10582	10695	8396	12532	9969	9838	7402	15483	11897	15128	8327	9170	8861	14173	9350	10160	8707	10547	12572	12287	11122	13235	11679	11509	10668	10265	10463	10891	9313	11118	11621	13157	12167	9727
Naphthalene_degradation	29347	43407	26730	50165	30293	33256	42912	21217	37770	29476	32971	30163	118125	80233	33918	26600	24089	35110	39041	24770	24059	32318	76285	39437	59895	28999	30271	25334	32303	24377	24765	26199	37141	36732	48440	32994	50209	29679	31993	27124	36331	31275	32305	25084	35685	32642	28368	34619	38684
Neuroactive_ligand-receptor_interaction	0	0	0	0	0	0	0	0	0	0	0	0	0	0	0	0	0	0	0	0	0	0	0	0	0	0	0	0	0	0	0	0	0	0	0	0	0	0	0	0	0	0	0	0	0	0	0	0	0
Neurotrophin_signaling_pathway	0	0	0	0	0	0	0	0	0	0	0	0	0	0	0	0	0	0	0	0	0	0	0	0	0	0	0	0	0	0	0	0	0	0	0	0	0	0	0	0	0	0	0	0	0	0	0	0	0
Nicotinate_and_nicotinamide_metabolism	103478	108577	74868	130275	110304	90606	118433	94645	103437	78487	99607	85838	375138	221654	84786	98243	104048	85422	101496	90183	98172	78099	249075	122448	125737	83942	89510	89125	131357	87739	91313	79769	92094	102298	134831	85057	113886	112832	112206	84917	98750	99691	97725	84634	103217	106008	115064	90475	104395
Nitrogen_metabolism	157656	204893	163386	220041	193028	189533	196964	139493	156412	148234	186828	163630	742612	441594	161334	148221	158818	168510	180432	145106	154977	147345	459115	201064	185016	141067	164318	150297	229804	145629	141063	158716	174263	175928	233275	166209	159391	184269	194782	149658	194883	168102	170979	137191	185407	191553	197047	173625	167715
Nitrotoluene_degradation	12214	15703	18595	27173	16952	10826	16808	8871	25786	7715	16907	10931	89964	53397	10839	11737	15435	7658	9804	6943	9531	16908	52590	22890	10901	14754	13744	16773	23921	18350	10119	7790	12333	18293	21492	7917	6679	14287	19865	12932	16369	16771	14807	10146	21514	19554	21394	6915	23232
Non-homologous_end-joining	589	2270	138	454	1110	377	789	284	2004	482	697	1406	482	7209	1245	1172	457	2336	1279	445	315	1867	335	4398	9737	1345	1291	949	776	1185	333	325	771	1183	3568	449	213	228	568	340	1992	447	853	743	1098	1289	783	462	2829
Notch_signaling_pathway	0	0	0	0	0	0	0	0	0	0	0	0	0	0	0	0	0	0	0	0	0	0	0	0	0	0	0	0	0	0	0	0	0	0	0	0	0	0	0	0	0	0	0	0	0	0	0	0	0
Novobiocin_biosynthesis	29880	33366	28043	41333	33432	27603	36270	26830	33601	24429	32529	27350	101493	59975	26526	29580	33406	28761	32493	24436	27236	22581	72000	38915	33881	28318	31254	30937	44295	32947	24955	25465	29909	31756	38772	27267	32092	31764	37019	29621	35367	32567	33958	26793	35103	35614	36399	26802	37319
Nucleotide_excision_repair	96694	89330	63444	121713	100189	64778	103562	84343	90475	63884	88340	76317	172188	135571	71062	88457	90320	79156	86645	82787	82887	63462	144562	112118	109199	70237	74672	73555	116750	77869	85938	64528	78351	87504	99332	73169	96287	97981	95497	74103	90945	92041	87392	76610	90594	96991	104487	76199	97857
Nucleotide_metabolism	6673	12078	5498	15996	7487	12237	11854	5722	14131	3783	13731	8818	169648	84130	8284	7997	7008	6573	9093	5034	12450	11309	91349	14257	5850	10343	10672	17360	10381	13402	4365	5717	7473	10248	24253	4662	9300	11786	12586	10136	10355	12150	10026	7390	8081	11232	11723	4392	14369
Olfactory_transduction	0	0	0	0	0	0	0	0	0	0	0	0	0	0	0	0	0	0	0	0	0	0	0	0	0	0	0	0	0	0	0	0	0	0	0	0	0	0	0	0	0	0	0	0	0	0	0	0	0
One_carbon_pool_by_folate	167713	157343	121755	195693	169338	129034	176746	146892	148856	124277	154629	134477	354400	243901	129770	152715	153643	140516	151419	151658	152126	112130	263824	182164	167778	130053	134719	133191	188769	136657	152784	122932	144247	150267	174163	135232	168723	174425	164255	134045	159760	153589	151930	139845	158216	161941	169261	140175	157176
Oocyte_meiosis	0	0	0	0	0	0	0	0	0	0	0	0	0	0	0	0	0	0	0	0	0	0	0	0	0	0	0	0	0	0	0	0	0	0	0	0	0	0	0	0	0	0	0	0	0	0	0	0	0
Other_glycan_degradation	90199	145893	85539	124033	121159	125322	129159	74564	57883	122853	107554	121351	105380	120771	136086	73616	83852	166528	144538	92752	49172	95816	64166	80330	143610	84600	84015	51570	106498	51401	81909	121335	126595	108140	108171	155139	121891	97180	106324	97079	143823	90997	107094	74449	106496	117950	113893	179004	72281
Other_ion-coupled_transporters	283918	388088	308904	397908	359386	351982	367030	267770	266542	271973	321746	288858	1705543	947644	309752	272532	298227	328827	333831	261149	295429	299368	1014886	384101	351538	283838	321471	299041	412400	286914	251950	287183	305576	305420	449299	302225	292563	344783	373128	283015	371919	322237	324009	258621	348238	356985	347192	309195	305452
Other_transporters	55739	76548	59189	95684	66104	63937	78001	47613	70250	53375	68624	61207	282112	161436	57302	53774	58866	65066	77102	46560	51245	57196	170524	77750	83903	52910	59742	55306	86784	53789	46865	59893	63080	71972	91106	58277	75341	62121	71365	52350	71226	69911	67601	46708	66811	73984	74143	58838	72745
Other_types_of_O-glycan_biosynthesis	0	0	0	0	0	0	0	0	0	0	0	0	0	0	0	0	0	0	0	0	0	0	0	0	0	0	0	0	0	0	0	0	0	0	0	0	0	0	0	0	0	0	0	0	0	0	0	0	0
Others	169762	256239	167410	297969	224423	212715	263348	138065	201221	155651	222950	204007	988235	573388	186782	165413	175531	251787	234648	141621	150299	207507	601669	261438	261928	159032	188235	170499	287536	170155	141589	180700	195526	209367	287288	192754	223117	198193	230518	180984	251143	212240	206242	143077	221844	231376	245497	209107	222549
Oxidative_phosphorylation	279205	295976	237947	363183	299369	248905	317935	235192	248276	236277	263374	244269	834387	530202	245580	249545	254530	251198	283755	245708	247018	198136	533468	324085	278244	225081	230512	213169	351090	218518	244788	232518	251617	264452	311164	246034	298136	303938	295610	217623	289164	264050	268618	223592	289887	306379	295170	254888	275842
PPAR_signaling_pathway	24712	32451	28239	33566	30723	28661	32666	25628	29959	27730	31394	28056	52598	45316	28541	24416	27974	29005	30607	24494	20076	24502	36595	30583	40510	23664	27823	21267	33471	21899	23317	26283	33353	29587	36192	31321	27230	26243	28030	24870	32528	28114	27843	23491	31024	32546	29639	34707	28594
Pancreatic_cancer	0	0	0	0	0	0	0	0	0	0	0	0	0	0	0	0	0	0	0	0	0	0	0	0	0	0	0	0	0	0	0	0	0	0	0	0	0	0	0	0	0	0	0	0	0	0	0	0	0
Pancreatic_secretion	0	0	0	0	0	0	0	0	0	0	0	0	0	0	0	0	0	0	0	0	0	0	0	0	0	0	0	0	0	0	0	0	0	0	0	0	0	0	0	0	0	0	0	0	0	0	0	0	0
Pantothenate_and_CoA_biosynthesis	144811	158499	107559	189788	162081	124214	183944	116869	143733	108121	153299	129303	458462	299347	123213	134495	150762	125976	142946	105690	115284	103954	328100	189469	166246	131999	138236	139109	209591	150318	117209	113380	129217	148541	176256	123066	163194	148908	173769	139907	158002	148062	149744	121730	164149	164804	173871	124798	164125
Parkinson's_disease	0	78	60	340	12	25	3	1	339	650	0	1122	67	50	481	118	3	3	136	133	78	32	31	997	224	42	1016	23	192	303	6	86	506	208	12	32	25	4	171	0	0	3	12	459	1153	1852	61	39	4
Pathogenic_Escherichia_coli_infection	0	15	0	10	5	15	0	0	5	0	0	10	0	5	10	0	0	0	25	0	0	0	0	5	5	0	0	5	25	0	0	5	10	5	5	0	0	0	5	0	0	5	5	0	0	5	5	0	0
Pathways_in_cancer	11231	11661	9190	15678	12304	9480	12602	10280	10059	9031	10502	10246	37759	21323	9002	10582	10776	9653	12459	10298	10749	7732	24403	13396	12856	8167	11235	9312	15367	9559	10165	9035	10588	13889	14127	9490	13467	12316	12200	8741	11043	11546	11625	9650	11523	12906	12917	9123	10953
Penicillin_and_cephalosporin_biosynthesis	4160	12106	7333	5923	7934	11879	9233	3891	4542	7474	8057	8923	36472	26835	11688	4262	4712	10367	8583	3606	5461	5344	22991	8058	11319	7318	7525	7869	7993	7783	2990	7639	7946	5400	9358	9771	5860	5368	7216	10269	9815	4087	6572	6124	8031	8074	6337	12689	7090
Pentose_and_glucuronate_interconversions	104246	177676	113217	200237	130747	157491	188596	80856	113908	126576	150166	140826	664040	420214	143345	100267	120812	154973	157803	76806	74662	127397	404645	160149	205719	125442	133316	122678	145007	115188	77018	144057	133668	108752	200877	141164	166640	113059	151141	130473	163872	134814	128704	90332	150290	155089	153069	153110	132367
Pentose_phosphate_pathway	184797	243154	135586	292176	227223	189349	278565	149972	203370	149852	211719	181871	745000	541228	191381	173468	194596	175663	209521	131511	142754	179476	502556	279418	284090	187002	188580	198323	273535	199806	147828	170657	186869	193216	260165	179979	222719	187036	229646	191040	232454	217417	194383	153404	221696	226259	232497	181080	222049
Peptidases	451699	482553	346370	570132	484179	391552	513473	396119	420783	334662	444866	389126	1445480	911624	362056	405559	418656	398595	432399	402085	424650	350682	983463	539893	518812	329139	374103	327962	556763	316892	404291	354311	393037	441532	540346	380218	445502	492494	473054	329781	459173	437799	435643	351950	443650	476210	500890	401886	457223
Peptidoglycan_biosynthesis	199112	190675	134142	244822	205880	144118	213010	180236	195582	133622	187757	155888	525943	327607	139314	187011	189388	152538	182302	175302	183083	137803	386535	231612	230255	143867	162285	153900	242824	156288	180202	142597	163177	196983	228526	148870	201282	211365	199864	148597	184240	194478	182220	158467	189493	197709	217318	152406	200742
Peroxisome	41149	49621	45133	54108	47577	49401	52540	38651	42394	47151	49925	47546	139336	91629	44193	36797	43286	52044	51133	39000	36296	40666	84858	47333	47624	36610	40825	27555	54443	26716	37238	44811	50332	47619	58525	49052	51296	44819	47518	31029	50042	44697	44809	33048	47992	50758	46273	53459	40948
Pertussis	3483	21156	9589	9018	9732	29468	10218	6967	8128	12051	9440	12993	222199	88654	13229	4937	5947	7944	17080	6451	16866	7659	110944	4858	10738	7140	8905	10525	15972	4309	3852	14197	13245	10299	30681	12718	9674	14877	15748	7928	11631	7878	9352	4711	8150	9697	9285	14588	4849
Phagosome	0	0	0	0	0	0	0	0	2	0	0	0	1	0	0	0	0	0	0	0	0	0	0	0	0	0	2	0	0	0	0	1	0	6	0	0	0	0	2	0	1	0	58	0	0	9	3	0	575
Phenylalanine_metabolism	38506	53733	46989	60210	48072	51242	59862	33784	47331	37859	44737	44283	264211	141498	42398	38585	41804	46508	51796	32721	40918	37984	144569	54609	56632	38904	45192	44448	61346	44729	31789	36377	48701	46460	71778	42928	53583	45870	51814	43529	53314	42928	45969	36430	50484	51067	49005	45075	51232
Phenylalanine,_tyrosine_and_tryptophan_biosynthesis	189502	206098	156313	259911	216677	161795	237041	147326	198505	147996	197523	165886	542449	356900	164946	178019	199685	165020	189931	138965	143792	138788	383261	251906	243699	170182	179249	176450	285975	193669	155102	148031	169536	199813	239857	163324	211581	193322	227956	180282	208558	195952	200486	158130	214510	219968	234968	170200	216648
Phenylpropanoid_biosynthesis	41789	45962	28087	51180	41609	39060	60661	24192	32030	53996	56104	45201	141411	89407	45092	34476	52702	98878	45794	28302	18042	38095	82580	51899	38221	47153	42799	25727	61147	27294	32120	49275	63704	36076	61171	56249	66272	40220	57658	26919	83815	56217	42778	24777	54972	58031	58987	46578	39800
Phosphatidylinositol_signaling_system	16568	23988	21684	25212	18857	22091	21766	13898	21294	20033	21467	21583	63561	37020	19335	15997	16464	22902	24283	14835	14556	16547	44029	18994	26652	15347	18366	13908	22766	13050	14443	20215	22215	22041	26000	20423	22089	18909	20924	15415	22941	19534	21042	13799	20550	23518	21336	22213	22029
Phosphonate_and_phosphinate_metabolism	8013	20089	15127	18855	11750	17445	18057	7442	13097	13165	14545	13521	66101	36546	14831	9023	9260	16468	17329	7160	6748	14207	39022	12269	29691	8353	13791	6935	11912	4612	6058	13251	19586	16384	23129	16973	16294	9922	12736	10360	20848	16539	14299	7025	13951	16822	16774	18438	14840
Phosphotransferase_system_(PTS)	62281	108853	27981	127939	78271	96787	114485	42444	67892	25841	63961	51424	1194457	692136	86266	66523	69587	24946	59625	30816	118119	133544	792918	142352	49230	117551	74431	169735	109071	146803	34733	45945	31016	52674	157470	38096	29233	90658	113514	106464	92730	82066	65181	70743	87092	91827	61316	18661	95749
Photosynthesis	97976	85546	60978	101260	108838	62082	113729	87066	72726	60419	79484	67117	157622	139910	72344	88101	108044	62015	79183	73538	77165	65447	143128	122455	74455	76358	74482	74434	135274	83350	82948	64977	67251	77809	72990	71506	98059	99659	104460	79163	88611	89346	82959	75274	97305	97335	118720	68333	85699
Photosynthesis_-_antenna_proteins	0	0	0	0	0	4	0	4	4	0	0	0	0	0	0	4	0	0	4	0	0	0	0	38	4	0	4	0	0	17	0	0	0	0	38	0	0	0	4	0	0	0	0	0	17	0	0	0	0
Photosynthesis_proteins	98131	86459	62934	101701	109241	63523	114139	87362	73655	60967	79935	67813	173651	146107	73002	88414	108454	62546	79894	74122	78448	65766	151670	123520	75096	76556	75515	75106	136405	83709	83149	65629	68030	78227	74987	71870	98347	100737	105191	79453	89152	89609	83307	75647	98011	97980	119187	68560	85949
Phototransduction	0	0	0	0	0	0	0	0	0	0	0	0	0	0	0	0	0	0	0	0	0	0	0	0	0	0	0	0	0	0	0	0	0	0	0	0	0	0	0	0	0	0	0	0	0	0	0	0	0
Phototransduction_-_fly	0	0	0	0	0	0	0	0	0	0	0	0	0	0	0	0	0	0	0	0	0	0	0	0	0	0	0	0	0	0	0	0	0	0	0	0	0	0	0	0	0	0	0	0	0	0	0	0	0
Plant-pathogen_interaction	33437	37233	20354	49801	41730	24818	44006	28104	40310	21734	35327	27097	97095	69313	28160	33155	40078	24331	32850	24157	25044	23864	68740	49557	41759	30627	31996	36357	55140	41065	28231	22292	29822	36712	40823	27087	35712	34661	41710	36726	36060	38560	33979	29301	39894	39672	48448	27200	38375
Polycyclic_aromatic_hydrocarbon_degradation	26204	25102	18384	32319	29327	19800	33887	23136	23881	20255	25061	21069	40871	32798	19447	23132	26447	22400	28136	20979	19561	20030	36083	29578	30741	18691	21127	15297	34485	16994	23044	19528	23607	27016	26926	23249	35196	26188	27732	18858	26710	28221	24307	19104	28047	26857	31672	24203	26515
Polyketide_sugar_unit_biosynthesis	53102	60298	39634	63072	60186	46816	60397	44640	46323	41127	57836	52516	88076	74313	48195	48436	47353	61625	54507	50973	43185	44804	70388	58538	65820	39295	46260	38439	63456	40753	47136	45401	49912	60272	57193	53531	46444	55277	50344	47500	57296	47233	53189	44169	51019	58363	57784	62571	52404
Pores_ion_channels	91714	128361	113837	105016	117040	150542	108686	97721	88700	107927	111950	113468	670977	308215	107921	90250	79553	133046	132358	115839	117806	91029	350185	85848	114176	76287	104329	80647	115006	66545	95452	105891	125726	105839	165073	122645	93590	130406	108734	90253	124733	100355	104798	88848	97250	108390	102420	141320	82291
Porphyrin_and_chlorophyll_metabolism	164551	236986	150459	285924	272877	170813	229677	179392	195746	131178	213730	162933	625344	447575	181600	171690	225384	151621	149932	107074	126571	181635	426830	301025	217320	191284	211325	237041	327344	267644	136130	154993	168654	211746	227947	165677	120693	187549	276103	235763	214439	209830	188931	167860	259938	246275	264282	169635	214735
Prenyltransferases	84756	75623	67662	89905	83360	67340	85971	76018	75700	68507	76806	69662	183053	118580	66669	79034	77243	78155	77949	79309	78602	55254	132916	84318	82173	67501	72453	68318	91267	69632	79122	64211	76455	76542	88496	71215	86712	89300	82975	67472	82836	76780	77702	72315	79323	81194	81593	72053	82292
Primary_bile_acid_biosynthesis	7047	13341	6889	12048	10674	9841	14461	4051	6929	8530	11398	9785	3894	13613	10424	6275	7531	9268	12454	4492	1890	11148	6855	10750	14740	6890	7995	4531	14269	4694	4909	9893	11035	7676	9300	11318	13309	6270	9741	8226	12025	9746	9796	4881	9998	10661	12844	13224	8994
Primary_immunodeficiency	12741	11364	10337	16833	12041	11406	14960	8463	8793	11355	10306	9586	36777	28068	11388	10608	11010	8904	12455	10052	10335	10514	24912	13374	7107	11437	9421	10797	14376	10580	10495	10409	11315	8403	12060	10588	15722	12562	13054	9390	11160	10186	11138	9704	12261	11775	10956	9705	9659
Prion_diseases	303	1853	1191	3151	837	1471	667	395	1085	629	638	1079	16103	9565	1107	389	294	440	742	624	1409	1030	8849	2253	533	720	798	1108	1184	756	260	1224	715	523	2441	422	260	1202	853	216	686	383	583	363	671	935	603	309	588
Progesterone-mediated_oocyte_maturation	10848	10654	7138	14439	11025	7786	12033	9150	8359	7920	9433	8212	20450	15081	8047	9928	10294	8168	11205	9492	8956	7289	15331	11467	12240	7801	8760	8577	13258	8998	9529	8050	9431	12324	11527	8954	12708	11055	10626	8636	9564	10110	10092	8608	10219	10680	11939	8612	9291
Propanoate_metabolism	93154	122226	76343	162072	109772	98027	129910	80322	132570	70642	103792	91482	567311	299322	87610	95852	98650	89605	118528	74317	91160	101688	350343	136618	136370	95043	103981	111940	143274	113453	77345	79550	97350	130693	154478	81580	115064	105897	119766	100416	116728	116945	108169	88592	122030	115022	118574	80831	129739
Prostate_cancer	11207	11262	7944	16471	11662	8342	12668	9492	9727	8752	11361	10086	21423	15320	8440	10301	10495	12449	13891	10499	8969	9436	15417	11561	12469	8048	9795	8748	13932	9160	9892	9550	10547	15054	13307	10012	13852	11295	11029	8955	11057	11258	11509	8972	10758	11803	12444	9791	10142
Proteasome	10850	10677	7142	14463	11029	7787	12033	9154	8858	7920	9455	8212	20635	15202	8060	9956	10312	8210	11261	9492	9006	7473	17183	11618	12411	7805	8886	8639	13290	9042	9529	8096	9433	12356	11527	8955	12708	11055	10638	8636	9572	10112	10282	8667	10362	10740	11948	8614	11044
Protein_digestion_and_absorption	11269	10781	9875	6411	11012	11779	8867	11617	3144	11876	7319	9090	3913	6286	11381	9804	7723	10191	10229	14292	12122	6084	2543	5043	9930	6889	6582	4259	5870	3080	12664	9989	11064	6935	9153	13130	9742	13001	7701	7676	8870	6184	8935	9816	7633	8144	8022	15406	4817
Protein_export	138604	151169	115096	178176	152533	118454	161248	123689	139339	115991	142011	125286	357993	252786	126736	131973	140439	132048	136459	117032	117546	109975	266586	168937	171243	125028	127957	129209	175914	134725	124174	114563	126936	147229	166900	124041	147546	145374	157213	128219	144325	142233	140389	122233	148383	157230	158077	131880	150451
Protein_folding_and_associated_processing	138769	159359	136519	177465	155002	144707	156756	132229	150132	115873	147493	135933	725119	394019	129360	135438	132846	142528	148677	129967	148281	111526	461736	170443	163643	123035	140587	146640	180443	140872	124203	121497	138601	144344	204223	128074	135928	163320	159378	131463	149021	139399	143581	125830	147847	152194	150020	134144	157032
Protein_kinases	52365	82719	43498	88511	69231	69830	81579	41135	71861	43522	69174	59356	472108	259231	55643	47017	54476	47714	64654	39106	52824	52571	277850	93396	83576	47574	54941	51691	92980	45025	41172	51321	56387	62070	101372	49240	64769	67365	71992	44828	67873	63386	57010	38084	66271	72364	80559	53077	66414
Protein_processing_in_endoplasmic_reticulum	18127	21742	15188	20612	20428	17931	19949	17223	14472	16996	18445	16893	24721	21808	19621	18468	16353	17020	20355	18620	15359	11496	18310	16719	27086	16251	18940	18988	19187	20059	17466	15840	21011	19365	21418	21065	19506	19099	17807	22149	19004	17024	19123	18621	18044	18257	19514	23760	19868
Proximal_tubule_bicarbonate_reclamation	2896	9567	6177	8367	5849	9625	9270	3315	6332	5241	7407	8219	31679	16596	6336	2940	2255	10755	10028	3415	3376	4611	13541	4134	13313	2515	5704	2225	6154	1607	2299	5776	8457	6893	9991	7731	9845	4352	5186	5554	8692	6141	6951	2887	5040	6338	5735	10721	8123
Purine_metabolism	520237	546202	407653	645807	572571	444237	568847	469048	500119	402556	508168	442305	1623267	1035885	433427	484968	495041	434759	490570	458665	489085	408258	1141071	630433	603068	427409	458958	443459	652717	445355	473133	411926	451366	512105	622314	433835	502583	564106	565199	424238	512908	509612	495721	432233	528950	546535	570638	452836	534690
Pyrimidine_metabolism	449429	448270	319869	556901	474128	342968	489323	403607	422037	325192	428299	365230	1098163	764391	353872	415784	427360	359030	404044	393775	405247	340035	807332	528652	510916	359679	369027	372012	539384	378597	406946	339696	371109	431200	499726	357147	448357	472131	463143	362133	422530	430402	413990	369781	439970	455414	481746	374253	458184
Pyruvate_metabolism	202115	283032	181883	345727	251091	229447	305061	167837	256053	179741	245793	217458	921656	568735	202288	190207	214778	209601	262667	150706	169551	201374	589777	296184	335022	188830	212682	181794	320454	184610	164700	193554	227001	265921	325305	210051	269240	218072	262551	192172	265944	246629	242294	162271	259354	267683	266085	219405	273140
RIG-I-like_receptor_signaling_pathway	186	322	29	571	250	396	620	72	136	16	240	116	9790	3094	98	291	167	72	64	122	229	49	6903	725	239	372	286	207	210	179	193	163	18	57	1035	96	33	568	382	88	725	488	204	99	589	237	62	30	618
RNA_degradation	106831	122532	96880	140689	118426	103032	125537	98365	104298	96909	111097	100681	294251	193690	102124	102640	109699	105069	112430	95087	95899	87588	212156	125250	128895	95554	100761	94656	133588	95161	97816	98199	106863	112072	128806	104557	116978	114908	118847	98439	119493	111960	109462	93832	116729	121499	128216	110362	114009
RNA_polymerase	35187	35088	27195	44016	40500	25666	36903	32581	38716	25189	36356	29175	82871	57503	27368	34033	35674	26088	29765	29917	31485	29382	67329	47073	42738	30297	31592	32533	48887	34994	32724	25520	28421	36526	41498	27139	26612	37222	39892	30453	35281	37225	34797	30948	38008	39394	39038	28215	45361
RNA_transport	27997	31772	18898	44071	31573	21456	38734	20094	30633	19323	29367	23472	91979	58222	23339	26621	30450	22662	27402	16052	16907	20669	59027	40794	35064	27581	23408	30476	45466	33571	21477	20902	23437	29779	34305	21285	35360	27522	33857	29057	30057	30254	28556	22488	33888	32528	36577	20340	39413
Regulation_of_actin_cytoskeleton	0	0	0	0	0	0	0	0	0	0	0	0	0	0	0	0	0	0	0	0	0	0	0	0	0	0	0	0	0	0	0	0	0	0	0	0	0	0	0	0	0	0	0	0	0	0	0	0	0
Renal_cell_carcinoma	383	992	2046	1221	1279	1692	569	1129	1697	956	1069	1758	17301	6239	837	631	482	1485	1242	787	1787	441	9072	1791	560	356	2249	730	2064	464	636	960	1137	1561	2597	534	758	1260	1532	105	1479	1435	1533	892	809	1746	968	507	1661
Renin-angiotensin_system	0	6	3	8	0	1	0	0	16	6	0	3	8	12	2	11	0	1	15	13	5	0	4	150	38	5	139	0	4	27	0	13	41	5	6	1	1	1	0	0	3	4	0	33	45	11	0	1	0
Replication,_recombination_and_repair_proteins	154782	182097	118775	250840	176874	136705	188316	139680	188332	113312	176457	141539	556488	327540	126158	154735	164392	132334	169139	118165	137559	123812	388655	206713	196331	149436	163882	181618	237085	192438	132802	130925	150008	179283	211498	121163	177240	162234	187734	165164	172220	188934	163378	140221	189668	177344	200671	117883	193803
Restriction_enzyme	47982	57213	37760	60920	54181	50580	61328	42955	54547	43579	58777	46443	100647	59071	49642	45750	47953	47292	60801	44330	36168	35928	68252	42238	68232	43454	49179	46903	54954	48853	43080	40481	56930	63371	60951	54641	60477	47782	50744	56531	56380	51911	52126	46152	51665	52506	56269	63211	55545
Retinol_metabolism	6498	12435	6372	7420	8167	10822	8766	6691	6952	5886	4799	6065	66663	29786	9129	6630	4532	11588	8939	8218	9118	2253	36589	7881	19627	3680	5672	4550	5912	2926	7022	4287	6917	4457	13982	8078	10851	10261	6497	6671	6686	3424	6167	6374	6296	4583	6668	11639	7758
Rheumatoid_arthritis	0	0	0	0	0	0	0	0	0	0	0	0	0	0	0	0	0	0	0	0	0	0	0	0	0	0	0	0	0	0	0	0	0	0	0	0	0	0	0	0	0	0	0	0	0	0	0	0	0
Riboflavin_metabolism	61116	60131	52660	54030	67183	55989	56386	61568	51714	46835	55095	48526	236356	129389	49973	58969	61800	48894	52129	61234	68494	42531	144052	67165	55827	48775	52462	53222	73865	52942	59570	44184	51594	52475	72828	50437	43105	73156	65513	51604	59084	54915	54713	54636	59767	60318	66421	52658	53460
Ribosome	579439	534862	415815	702838	596272	409180	623784	518554	562121	407896	541981	455350	1158696	807630	424037	539507	550121	457898	521213	500704	507018	395817	922759	662756	639516	441657	470588	464362	698049	486413	522717	409687	475636	559490	617360	443992	599048	594164	582197	458389	533901	565012	536852	475567	553987	580552	614169	457063	613930
Ribosome_Biogenesis	319509	325557	232535	410058	348242	255795	369019	286110	324869	221886	317949	261894	1084396	630896	237720	297254	323408	256664	306514	265440	287747	243947	745442	403788	370254	246647	275483	265532	436377	269302	282082	240223	270781	328324	390615	246220	336484	345305	352251	251290	316556	330631	305484	253297	323550	339445	372973	248932	339169
Ribosome_biogenesis_in_eukaryotes	11107	11118	8898	13989	11553	8975	12689	10042	10644	7956	9632	8611	37006	20899	8446	10543	10759	8462	10754	9527	10745	7914	26752	13320	12570	8447	9550	9324	14263	9352	9955	8295	9708	10933	13087	8550	12593	12146	11750	8801	10702	11002	10972	9122	10858	11466	12294	8364	15890
Salivary_secretion	0	0	0	0	0	0	0	0	0	0	0	0	0	0	0	0	0	0	0	0	0	0	0	0	0	0	0	0	0	0	0	0	0	0	0	0	0	0	0	0	0	0	0	0	0	0	0	0	0
Secondary_bile_acid_biosynthesis	6914	13086	6614	12028	10344	9805	14236	4003	6778	8447	11278	9739	3887	10547	9921	6209	7468	9265	12436	4446	1787	9077	6778	9866	14555	6259	7742	4154	14161	4358	4893	9881	10995	7664	9294	11251	13300	6234	9623	8038	11981	9730	9786	4662	9666	10495	12750	13205	8973
Secretion_system	218520	298664	199551	346483	240748	276032	311635	181311	326820	164983	252565	240560	1811687	919132	206742	226549	237499	190204	289713	174192	260078	186893	1041803	310382	282839	216099	236056	303184	365448	287672	176558	188918	244314	285972	402209	175352	309764	268022	289106	246567	256472	261039	238803	204431	245143	267930	301361	173853	288606
Selenocompound_metabolism	81221	92197	67425	99823	98524	79619	97132	69342	80897	64541	88113	76742	353725	212232	73697	74192	81162	71901	79320	67921	78773	75854	242612	112201	97201	70199	77891	70004	119825	71161	71527	65980	73296	79797	110183	73708	71298	91415	98651	69576	91282	83639	83052	66051	91220	96928	101757	77129	88072
Sesquiterpenoid_biosynthesis	0	0	0	0	0	0	0	0	0	0	0	0	0	0	0	0	0	0	0	0	0	0	0	0	0	0	0	0	0	0	0	0	0	0	0	0	0	0	0	0	0	0	0	0	0	0	0	0	0
Shigellosis	0	7	0	4	2	23	0	1	2	0	0	4	12	8	4	0	0	0	10	0	6	0	6	2	2	0	0	2	10	0	0	2	4	2	3	0	0	0	2	0	1	2	2	0	0	3	2	0	0
Signal_transduction_mechanisms	87940	112922	55593	144093	110372	83509	120095	77801	112196	60695	97862	81387	492374	262895	69053	82758	102930	72612	95142	59203	75791	78081	316756	133863	116509	76766	88054	83212	159308	83985	71741	76877	79371	108888	133866	70693	102772	100879	123283	73489	104035	107053	97073	66745	109160	109641	124821	67411	109711
Small_cell_lung_cancer	0	15	6	18	0	2	0	1	3	155	0	276	8	3	118	23	0	0	12	19	6	2	0	138	56	10	226	5	45	97	0	25	20	4	3	2	1	1	42	0	0	1	0	150	495	480	10	4	1
Sphingolipid_metabolism	61978	94344	57507	94609	75629	78170	89935	49134	46005	81931	75458	77368	81555	84625	84300	53572	64453	124963	94999	58054	30438	65003	51722	59748	90048	61536	62302	44020	75727	45128	52911	85141	91426	73882	74258	98964	89604	61872	73667	65116	107718	69555	73435	50616	75643	80156	77840	101298	57502
Spliceosome	0	0	0	0	0	0	0	0	0	0	0	0	0	0	0	0	0	0	0	0	0	0	0	0	0	0	0	0	0	0	0	0	0	0	0	0	0	0	0	0	0	0	0	0	0	0	0	0	0
Sporulation	126046	154813	19556	270541	146041	35619	201931	84902	183589	31927	147852	90565	65559	206039	69349	112051	156795	53310	99178	37802	38504	81628	99218	248589	232989	89968	83297	86088	219903	102666	83041	67187	75369	165551	136902	60501	150839	94607	151245	86055	135221	165716	126253	65565	154326	165932	212405	51959	181614
Staphylococcus_aureus_infection	107	174	153	600	127	142	62	74	321	22	165	129	441	870	175	799	73	202	225	71	173	1815	4530	1495	1091	88	1350	92	62	707	199	607	50	313	544	83	16	136	175	47	156	189	234	916	1532	264	81	30	844
Starch_and_sucrose_metabolism	248366	286031	162931	330325	256215	231468	339935	184064	218488	217950	276497	230732	926908	575298	227950	224090	264472	318546	272539	186287	174001	212606	623480	295673	321788	224839	226204	202086	323482	199982	197497	225923	268149	239004	335903	252222	332332	250663	287066	207480	331535	275816	243438	179707	274920	285325	311248	239447	247792
Steroid_biosynthesis	0	10	6	22	0	2	1	1	720	96	0	859	2	0	0	113	0	1206	824	40	4	0	4	53	596	4	69	0	115	20	0	7	6	2	10	1	13	0	4	1	1113	3	240	29	64	28	135	19	1055
Steroid_hormone_biosynthesis	7805	7325	9225	8136	7197	9774	8009	5180	4485	11575	8402	10061	10782	6488	8201	5766	4044	15121	13782	10321	5617	9603	3391	2902	6015	6492	8537	3318	5733	2386	7650	12170	13502	10801	8457	12397	9924	7717	6106	4089	15671	8378	8655	6022	7649	8577	5983	10295	5962
Stilbenoid,_diarylheptanoid_and_gingerol_biosynthesis	9	24	296	439	8	20	6	7	106	26	21	21	44	43	62	82	8	51	44	83	16	1939	31	186	373	158	272	41	26	120	11	24	304	39	363	19	64	9	6	83	125	66	41	259	511	52	23	54	8
Streptomycin_biosynthesis	79837	88665	62788	94139	84036	74939	94858	64654	74767	67216	87669	81868	183638	130974	72106	73500	72778	97053	86687	74266	64901	66834	130301	84346	106438	63323	73200	60110	89678	60217	69556	73246	79541	85971	96986	80453	79582	82384	78173	69590	93539	76392	80862	64796	79278	88158	88115	89872	82249
Styrene_degradation	3812	5290	5537	6435	3653	4432	5277	1667	3354	1652	4402	3961	41872	28152	3709	2465	1965	3783	2885	2027	6240	8664	21276	10364	3340	4039	6960	3874	5060	3038	1556	1443	2447	2814	7890	1426	1519	3602	4236	1491	5761	3417	5578	2640	5412	6181	2506	861	5717
Sulfur_metabolism	61997	76424	58975	78678	77562	72120	85789	50392	56067	60738	68388	64574	272374	153821	61851	55823	66186	70484	74694	51825	52712	55581	170252	80039	74376	54964	66108	47423	96760	48283	54158	59712	71244	71948	86095	68759	73841	69282	79010	53058	86607	68670	68315	48973	75185	78392	80057	67002	67761
Sulfur_relay_system	42694	71036	43275	77038	56916	58710	67955	35855	54558	35305	52594	47652	350394	178226	43630	41522	54113	40633	56202	28725	42038	44714	215109	70993	66322	42277	50242	47051	84451	46256	32009	43852	44620	57085	76253	40975	53312	54597	68637	44695	59842	51355	53077	34148	61210	62843	66922	41884	60047
Synthesis_and_degradation_of_ketone_bodies	3926	5769	3544	7589	7143	4624	6309	3887	8367	1935	5953	3910	69624	31039	3099	3505	6726	3055	3709	2484	5137	8119	41004	13407	5247	4455	8348	4039	10836	4481	2952	2750	3771	4537	10255	2548	1625	6276	8775	2374	6246	6693	5993	4033	8633	7253	6511	1976	7975
Systemic_lupus_erythematosus	0	6	1	7	0	0	1	0	241	33	0	287	2	0	0	32	0	402	275	14	2	2	0	4	177	2	17	2	39	2	0	1	13	1	2	1	4	0	1	0	371	1	80	3	4	5	47	6	352
TGF-beta_signaling_pathway	0	0	0	0	0	0	0	0	0	0	0	0	0	0	0	0	0	0	0	0	0	0	0	0	0	0	0	0	0	0	0	0	0	0	0	0	0	0	0	0	0	0	0	0	0	0	0	0	0
Taurine_and_hypotaurine_metabolism	23930	30074	26201	33342	28236	29095	30547	21424	29376	22485	30369	27476	108565	58017	22724	21870	23010	29876	29560	23529	24359	21985	72688	31004	28763	18448	27106	16988	34911	16610	21290	23868	28132	27125	36375	26812	24049	28523	28905	19993	31579	26168	29704	19927	28974	30861	28869	30084	29025
Terpenoid_backbone_biosynthesis	141750	133145	100149	170827	148131	101924	154308	126748	138820	100847	134275	112078	297393	211809	106652	131429	139321	111496	126410	121893	124598	101021	231072	167506	151676	113770	117488	115396	174160	121284	128954	101743	115285	135497	149733	110550	139372	145436	147006	112491	135507	139622	133350	118277	140761	144361	149575	112328	149382
Tetracycline_biosynthesis	23955	34546	16314	52810	30454	21702	45479	15147	33734	17412	25069	21206	92803	60488	21587	21465	23528	21038	37749	12123	12459	31504	65949	38185	44616	22791	20003	21744	46312	24284	16913	19689	24950	36269	35864	22348	45452	23079	32097	22331	30959	34332	28130	17041	33217	31127	30279	19333	36250
Thiamine_metabolism	112392	122658	92025	147614	133540	97056	141654	94016	114979	86586	118497	98336	318005	207095	98850	104084	121587	93420	109776	84678	87311	90538	232466	148246	131875	101389	106574	102841	173324	113094	94801	87505	102666	118876	133196	101449	117387	117639	138153	108027	129137	122016	118341	94769	130642	133683	144555	105017	127210
Tight_junction	0	0	0	0	0	0	0	0	0	0	0	0	0	0	0	0	0	0	0	0	0	0	0	0	0	0	0	0	0	0	0	0	0	0	0	0	0	0	0	0	0	0	0	0	0	0	0	0	0
Toluene_degradation	22313	24970	57738	25265	22659	31841	20405	25483	21354	33948	22027	20831	178513	82848	29767	24570	19608	28513	26598	35554	35628	24712	95721	17242	17513	21548	28570	26302	20435	21737	24670	27271	29799	18495	43556	25842	21886	33983	23365	20152	25456	17957	22003	25504	26238	28646	18733	27355	19126
Toxoplasmosis	0	15	6	18	0	2	0	1	3	155	0	276	8	3	118	23	0	0	12	19	6	2	0	138	56	10	226	5	45	97	0	25	20	4	3	2	1	1	42	0	0	1	0	150	495	480	10	4	1
Transcription_factors	311287	424009	184464	546024	367932	313347	446906	249632	391418	192210	363473	284349	2387931	1384780	262183	289545	334899	248390	321356	217947	317468	284491	1445091	532084	449845	283569	297216	338147	496144	309708	239259	257653	264288	358792	550034	233149	329692	364165	407837	260672	376387	375900	320096	233636	371015	389512	419712	214920	392948
Transcription_machinery	229368	273807	171464	343551	261433	200727	291404	205271	243533	194977	254753	226555	442708	342727	204343	207256	235507	250649	268596	198708	170480	193028	312998	272297	297644	183089	197046	159470	297833	163609	207231	211755	231453	274522	270330	227902	270970	235143	248648	185624	269518	252618	244680	179854	255134	265092	275919	240987	265244
Transcription_related_proteins	195	1819	2748	2617	478	2762	949	1102	1421	371	931	963	48356	18391	281	444	289	3545	1015	653	2643	1850	25001	537	354	729	1247	1846	1208	501	373	800	1085	586	5120	268	328	2393	1439	220	2265	691	1021	177	624	782	595	133	4676
Translation_factors	131136	127340	97710	160308	139545	101520	141475	119192	129365	98188	128403	108839	320001	205447	100493	122457	126564	112217	121575	115394	118317	91937	241649	150804	144314	103254	111408	107122	163508	111303	119281	98971	112673	131524	148178	106594	129841	138491	138249	105482	128125	131273	125942	108617	129591	136201	141635	110849	140285
Translation_proteins	208850	217085	160127	276961	224847	169594	241272	186226	227725	147618	211988	176063	681485	415228	162244	199465	207422	175183	204185	175465	191201	157436	469637	262834	253868	170484	185337	190281	279431	195019	184389	156919	180554	217525	259367	163886	220481	222554	229669	178036	210555	221019	207622	175329	213753	223352	239801	168990	238844
Transporters	1173861	1573866	804509	2025101	1561635	1132460	1831879	952858	1460325	733308	1408221	1101267	7703441	5099911	1114083	1084738	1323960	898163	1184260	713072	1045742	1345763	4946117	2240063	1591101	1177742	1164134	1389475	2061948	1371711	867301	957148	965582	1309068	1853986	909084	1280583	1287657	1604454	1135225	1404000	1421400	1201728	905802	1505577	1547290	1680785	869052	1495831
Tropane,_piperidine_and_pyridine_alkaloid_biosynthesis	26720	30355	27611	36091	28327	27387	33084	23786	31285	25853	29066	24948	116324	63455	26598	27558	30213	27682	31831	24012	26076	22776	72798	31903	31927	28777	30029	30580	36116	31056	23450	23988	31120	28331	38981	27108	34039	29458	33724	27906	34114	30464	31077	26020	32378	31043	30483	25853	33789
Tryptophan_metabolism	21850	32072	23683	36440	26603	36750	29231	18017	38518	19160	30558	28747	362530	162234	20277	20929	21051	28515	30749	21029	36730	27881	196801	42759	24643	21952	37184	29073	40956	24353	17040	23239	26853	27633	58403	18836	21829	34919	35538	17099	32797	28417	28167	21355	33497	30883	27026	17802	32170
Tuberculosis	34754	36396	26255	45239	36904	26463	42665	31040	33612	25424	33387	30010	64835	47744	26987	32262	35736	31309	35786	29609	29444	26120	57014	41202	44055	25473	29901	23423	43916	24377	31003	27619	32379	36102	37347	30205	39882	35501	35535	26720	38095	36861	34759	26915	35927	38167	41836	31603	39545
Two-component_system	238288	373573	282780	408574	317374	337643	378497	188462	384043	216698	343468	299338	2276389	1210030	271772	237628	287836	266724	318269	191114	259084	280278	1304360	427539	351408	246279	286272	291903	449830	273935	190975	240936	285707	325664	494804	235224	289801	310768	354128	254917	350567	316542	281715	204384	328500	364334	407497	248580	328867
Type_I_diabetes_mellitus	12547	14737	12035	17560	14346	13226	16426	11135	13956	11566	15207	13636	23155	17526	11727	11529	11603	14324	15558	11568	10078	10068	17903	13581	16141	9721	12560	9520	16898	9993	10988	11985	14779	14762	15677	13447	15042	13008	13492	11646	14700	14492	14222	10429	13449	15297	14729	15492	14101
Type_II_diabetes_mellitus	11666	12183	7144	15444	12053	9374	12882	9446	12007	7867	11186	9432	37147	21658	9138	11905	11329	9963	12893	10002	10467	9751	27184	13594	16868	10479	12648	12986	14745	13780	9915	8905	9560	13509	15240	9204	12636	12132	12963	12164	11416	11140	12493	10793	11703	11442	12292	8997	12554
Tyrosine_metabolism	70885	93057	60540	105592	80366	78778	96680	61028	84191	61696	76469	67346	417873	226573	69682	67409	70121	71344	89185	59883	70788	67929	256376	94828	107860	65190	69606	68056	100417	64673	60546	61551	77534	81417	115929	69707	100194	82610	86913	64147	84641	79142	75727	59335	82454	80345	82768	69764	86543
Ubiquinone_and_other_terpenoid-quinone_biosynthesis	55740	56868	49070	43066	51356	66974	39355	54076	35992	52728	38603	50068	387377	171790	50551	52211	41024	47169	54294	70320	78761	30592	206824	38566	43414	40548	44166	47632	47319	36949	57993	49254	50758	40064	82096	51552	43467	79742	54787	40770	48723	32884	46933	51766	42018	45401	44833	56349	36470
Ubiquitin_system	1209	4341	3981	2578	2783	5884	3077	1173	1584	4349	2458	3922	23099	10882	4019	1196	1616	2048	4441	1635	1752	2346	11629	880	3582	2622	2640	1757	2740	1321	1379	4354	2562	3124	4384	3887	4019	2574	2995	2675	2376	1503	2776	1686	2921	2860	2618	5381	1796
VEGF_signaling_pathway	0	0	0	0	0	0	0	0	0	0	0	0	0	0	0	0	0	0	0	0	0	0	0	0	0	0	0	0	0	0	0	0	0	0	0	0	0	0	0	0	0	0	0	0	0	0	0	0	0
Valine,_leucine_and_isoleucine_biosynthesis	143675	185981	119004	230503	171633	137321	215595	106571	180501	120447	177022	146660	520441	353588	138053	135419	161767	140240	169379	91104	93982	120819	366269	219644	218417	144699	154238	147365	240437	161335	106187	127737	145054	171851	208441	136791	197881	142614	192436	149223	178608	170949	169773	119397	187516	190161	192471	138700	201592
Valine,_leucine_and_isoleucine_degradation	39486	56059	47222	59239	55484	58472	52516	40567	57855	40083	49378	49199	368690	183932	46257	43595	45365	48006	52484	41088	51513	48601	210937	68175	54607	49403	68047	60031	62258	61049	36134	43153	47998	50588	80399	42914	36295	54435	60338	53256	54782	48787	50857	49538	64336	55118	50740	46445	53841
Various_types_of_N-glycan_biosynthesis	2	1	0	1	4	3	0	18	250	0	0	0	1	12	1	2	2	3	5	0	10	4	16	77	1	0	36	0	0	1	2	4	11	66	4	6	0	2	12	0	2	0	60	2	2	12	3	1	578
Vascular_smooth_muscle_contraction	0	0	0	0	0	0	0	0	0	0	0	0	0	0	0	0	0	0	0	0	0	0	0	0	0	0	0	0	0	0	0	0	0	0	0	0	0	0	0	0	0	0	0	0	0	0	0	0	0
Vasopressin-regulated_water_reabsorption	0	0	0	0	0	0	0	0	0	0	0	0	0	0	0	0	0	0	0	0	0	0	0	0	0	0	2	0	0	0	0	0	0	0	0	0	0	0	0	0	0	0	0	0	2	0	0	0	0
Vibrio_cholerae_infection	0	8	5	8	0	37	0	2	75	0	0	0	2	0	0	3	0	0	3	0	16	0	5	37	3	2	33	0	0	0	0	3	4	7	2	1	0	0	2	0	3	0	58	3	3	12	8	7	575
Vibrio_cholerae_pathogenic_cycle	19240	21222	13323	23067	18231	19326	20682	16213	14849	13068	15159	14668	95952	55307	16128	17604	18067	10907	15118	16912	21670	11082	59137	22713	18863	16748	14489	19016	21668	17676	16652	13535	15588	13027	23101	13657	16699	21846	19544	16053	17362	14119	15570	16118	17635	18810	19435	14055	14668
Viral_myocarditis	0	15	6	18	0	2	0	1	3	155	0	276	8	3	118	23	0	0	12	19	6	2	0	138	56	10	226	5	45	97	0	25	20	4	3	2	1	1	42	0	0	1	0	150	495	480	10	4	1
Vitamin_B6_metabolism	52588	57968	42194	70031	52734	50262	63623	45278	49124	41747	49824	47483	179485	107159	47500	50741	48325	50017	58370	48829	49882	36985	118614	53637	66552	45596	46749	52178	58362	51994	45981	43966	52068	52904	68643	47739	64265	56492	51755	53133	54808	51612	51014	47264	51313	53166	55449	50821	53051
Wnt_signaling_pathway	0	0	0	0	0	0	0	0	0	0	0	0	0	0	0	0	0	0	0	0	0	0	0	0	0	0	0	0	0	0	0	0	0	0	0	0	0	0	0	0	0	0	0	0	0	0	0	0	0
Xylene_degradation	9690	11219	1962	20734	11136	6827	18194	4524	12505	2543	8731	6772	59559	39340	4549	6718	6520	4008	11591	2803	7559	6781	37569	17228	18543	5141	5439	6098	18871	6385	5517	3767	7874	11457	16034	4856	20491	8847	11393	4502	7404	9853	8547	3541	9682	9823	9855	3072	12351
Zeatin_biosynthesis	16590	14286	12215	16532	15920	12524	16244	15180	12169	13160	13604	12833	23088	17330	12520	15066	14325	13788	14710	16391	15496	10244	18341	14868	15869	11666	12014	10649	15927	10510	16028	12303	14054	14034	15624	13991	17023	17265	14422	11573	14453	13979	14151	13375	13908	14812	15423	14747	13616
alpha-Linolenic_acid_metabolism	91	2475	627	916	669	3801	472	617	1731	577	1175	1335	47863	17978	641	497	113	517	2121	682	3133	1099	24683	1084	527	287	1355	1789	2702	491	155	1741	1225	1174	5546	473	431	2540	1895	222	741	899	1132	547	723	834	1037	298	704
beta-Alanine_metabolism	46062	48422	32775	56685	51846	49609	49380	36302	44498	34173	47625	40914	302916	139540	38833	44476	42254	39664	44985	42006	51637	29441	176208	55665	40471	41144	49882	51535	67344	53262	38986	34582	43147	41523	69328	38264	40374	57722	56618	48287	47962	41364	44956	44687	53407	48439	50023	42249	39845
beta-Lactam_resistance	4990	9860	6471	8023	9440	9062	8277	3760	3140	6634	6999	6838	29628	22882	9580	4505	6325	6979	6928	3015	4604	4213	18848	10599	8171	7622	6628	7573	12593	9223	3215	6959	5935	4211	8010	7986	5352	6331	8977	9195	8475	3801	5961	5805	9038	8338	6933	9300	5084
mRNA_surveillance_pathway	0	0	0	0	0	0	0	0	4	0	0	0	2	0	0	0	0	0	0	0	0	0	0	0	4	0	5	0	0	3	0	2	0	12	0	0	0	0	4	0	2	0	116	2	1	18	6	0	1150
mTOR_signaling_pathway	0	0	0	0	0	0	0	0	2	0	0	0	1	0	0	0	0	0	0	0	0	0	0	0	0	0	2	0	0	0	0	1	0	6	0	0	0	0	2	0	1	0	58	0	0	9	3	0	575
p53_signaling_pathway	0	15	6	18	0	2	0	1	3	155	0	276	8	3	118	23	0	0	12	19	6	2	0	138	61	10	232	5	45	99	0	25	20	4	3	2	1	1	42	0	0	1	0	151	501	481	10	4	1
[truncated: 3 more columns]
