# Supplementary material for: Gut microbiota induces high platelet response in patients with ST segment elevation myocardial infarction after ticagrelor treatment
Source: eLife. 2022 Mar 8;11:e70240. doi: 10.7554/eLife.70240 (PMC8903831; doi:10.7554/eLife.70240)
Supplement: Figure 5—source data 1. [file elife-70240-fig5-data1.xlsx]

## Sheet: otu_table_for_lefse
class	A	A	A	A	A	A	A	A	A	A	A	A	A	A	A	A	A	A	A	A	A	A	A	A	A	A	mean（A）	B	B	B	B	B	B	B	B	B	B	B	B	B	B	B	B	B	B	B	B	B	B
Taxon	A-1	A-2	A-3	A-4	A-5	A-6	A-7	A-8	A-9	A-10	A-11	A-12	A-13	A-14	A-15	A-16	A-17	A-18	A-19	A-20	A-21	A-22	A-23	A-24	A-25	A-26		B-1	B-2	B-3	B-4	B-5	B-6	B-7	B-8	B-9	B-10	B-11	B-12	B-13	B-14	B-15	B-16	B-17	B-18	B-19	B-20	B-21	B-22
o__Actinomycetales	0.000384014	0	0	0	2.74296e-05	0	0.000137148	2.74296e-05	0.000274296	0	0.000109718	2.74296e-05	0	0	0	0	0.000192007	0.00126176	2.74296e-05	8.22887e-05	2.74296e-05	5.48591e-05	0	8.22887e-05	0.000246866	0	0.000113938	2.74296e-05	8.22887e-05	0	0.000713169	0	0.000384014	0.000192007	2.74296e-05	0	0	0	8.22887e-05	0	0	5.48591e-05	0.000603451	0.00425158	0.0012069	0.00345613	0.000493732	0.00175549	0.000493732
f__Cellulomonadaceae	0	0	0	0	0	0	0	0	0	0	0	0	0	0	0	0	0	0	0	0	0	0	0	0	0	0	0	0	0	0	0	0	0	0	0	0	0	0	0	0	0	0	0	2.74296e-05	0	0.000301725	0	0	0
g__Cellulomonas	0	0	0	0	0	0	0	0	0	0	0	0	0	0	0	0	0	0	0	0	0	0	0	0	0	0	0	0	0	0	0	0	0	0	0	0	0	0	0	0	0	0	0	2.74296e-05	0	0.000301725	0	0	0
g__Olsenella	0	0	0	0	0	2.74296e-05	0	0.00260581	5.48591e-05	2.74296e-05	0	2.74296e-05	5.48591e-05	0	0	2.74296e-05	0	2.74296e-05	0	2.74296e-05	0	0	0	0.00104232	0.00307211	0	0.000269021	0	0	0	0	0	2.74296e-05	0.000109718	0	0	0	0	0	0	0	5.48591e-05	0	5.48591e-05	0	0	0	0	0
g__Slackia	0.00156349	0	0	0	0	0	0	8.22887e-05	0	8.22887e-05	0	0.000219437	0	0	0	0	0	0	0	0.000109718	0	8.22887e-05	0	0	0.000466303	0	0.000100223	0	0	0	0	0	0	0	0	0	0	0	0	0	0	0	0	0	0	0	0	0	0.000164577
g__Barnesiella	0.00861289	0	0	0	0.00842088	0.000521162	0	0.00891461	0	2.74296e-05	0.000438873	0.00202979	2.74296e-05	0.00211208	0	8.22887e-05	0	2.74296e-05	0.014812	0.000493732	0	0.00515676	0.00600708	0	0.000192007	0.0139891	0.00276406	0.00644595	0.000768028	0.0213951	0.00197493	0.00249609	0.0262501	0.0179938	0.0277313	0.00765285	0	0.0136051	2.74296e-05	0.0012069	0.0170063	0.00367556	0.0222454	2.74296e-05	0.000246866	0.000164577	0	0.00238637	0.00340127
c__Deinococci	0	0	0	0	0	0	0	0	0	0	0	0	0	0	0	0	0	0	0	0	0	0	0	0	0	0	0	0	0	0	0	0	0	0	0	0	0	0	0	0	0	0	2.74296e-05	0	0	0.000246866	0	0	0
c__Bacilli	5.48591e-05	2.74296e-05	0.00104232	8.22887e-05	0.00438873	0.00131662	0.00255095	0.000822887	0.00266067	0.000466303	0.00192007	0.00329155	0	5.48591e-05	0.000521162	0.000713169	0.000932606	0.0102038	0.000192007	0.000905176	0.000109718	0.000329155	0.000192007	0.00063088	0.100365	0.000137148	0.00515043	0.000850317	0.00065831	8.22887e-05	0.00150863	0.000219437	0.00150863	0.000466303	0.000219437	5.48591e-05	0.00126176	0.00301725	0.000466303	0.00065831	0.00137148	0.00109718	0.0116576	0.0121239	0.00981979	0.00806429	0.00820144	0.00916148	0.0118496
o__Bacillales	2.74296e-05	0	0	0	2.74296e-05	0	8.22887e-05	0	0	2.74296e-05	2.74296e-05	0	0	0	0	0	5.48591e-05	0.000384014	0	0	0	2.74296e-05	0.000109718	0.000109718	0.000713169	2.74296e-05	6.2244e-05	0	0	0	0.00145377	5.48591e-05	0	2.74296e-05	2.74296e-05	0	2.74296e-05	0	0	0	2.74296e-05	0	0.00543106	0.00606194	0.000219437	0.00718655	0.00112461	0.00839345	0.00351099
f__Paenibacillaceae 2	0	0	0	0	0	0	0	0	0	0	0	0	0	0	0	0	0	0	0	0	0	0	0	0	0	2.74296e-05	1.05498e-06	0	0	0	8.22887e-05	0	0	0	0	0	0	0	0	0	0	0	0	8.22887e-05	0	0.000109718	5.48591e-05	0.000713169	2.74296e-05
f__Planococcaceae	0	0	0	0	0	0	0	0	0	0	0	0	0	0	0	0	0	0	0	0	0	0	0	0	0	0	0	0	0	0	2.74296e-05	0	0	0	0	0	0	0	0	0	0	0	0	5.48591e-05	0	8.22887e-05	5.48591e-05	0	0
g__Planomicrobium	0	0	0	0	0	0	0	0	0	0	0	0	0	0	0	0	0	0	0	0	0	0	0	0	0	0	0	0	0	0	2.74296e-05	0	0	0	0	0	0	0	0	0	0	0	0	5.48591e-05	0	8.22887e-05	5.48591e-05	0	0
f__Staphylococcaceae	0	0	0	0	0	0	0	0	0	0	0	0	0	0	0	0	2.74296e-05	0	0	0	0	2.74296e-05	5.48591e-05	0	0	0	4.21993e-06	0	0	0	0.00112461	0	0	2.74296e-05	0	0	0	0	0	0	0	0	0.00529391	0.00523905	0.000109718	0.00644595	0.000740599	0.00699454	0.00323669
g__Staphylococcus	0	0	0	0	0	0	0	0	0	0	0	0	0	0	0	0	2.74296e-05	0	0	0	0	2.74296e-05	5.48591e-05	0	0	0	4.21993e-06	0	0	0	0.00112461	0	0	2.74296e-05	0	0	0	0	0	0	0	0	0.00529391	0.00523905	0.000109718	0.00644595	0.000740599	0.00699454	0.00323669
f__Lactobacillaceae	0	2.74296e-05	0	0	0	0.000246866	0	0.000822887	0	8.22887e-05	0.000548591	0	0	0	0.000274296	0.000192007	0.000438873	2.74296e-05	5.48591e-05	0	0.000109718	0	0	5.48591e-05	0	0	0.000110773	0	2.74296e-05	0	0	0	0.000768028	5.48591e-05	2.74296e-05	2.74296e-05	8.22887e-05	2.74296e-05	2.74296e-05	0.000521162	0.000438873	0	0.00271553	0.000329155	0.00312697	0.000137148	0.000438873	0.000356584	0.000822887
g__Lactobacillus	0	2.74296e-05	0	0	0	0.000246866	0	0.000822887	0	8.22887e-05	0.000548591	0	0	0	0.000274296	0.000192007	0.000438873	2.74296e-05	5.48591e-05	0	0.000109718	0	0	5.48591e-05	0	0	0.000110773	0	2.74296e-05	0	0	0	0.000768028	5.48591e-05	2.74296e-05	2.74296e-05	8.22887e-05	2.74296e-05	2.74296e-05	0.000521162	0.000438873	0	0.00271553	0.000329155	0.00312697	0.000137148	0.000438873	0.000356584	0.000822887
g__Anaerococcus	0	0	0	0	0	0	0	0	0	0	0	0	0	0	0	0	0	2.74296e-05	0	0	0	0	0	0	0	0	1.05498e-06	0	0	0	2.74296e-05	0	0	0.000246866	0	0	0	0	0	0	0	0	0	0	5.48591e-05	2.74296e-05	0	2.74296e-05	0
g__Peptoniphilus	2.74296e-05	0	0	0	0	0	0	0	0	0	0	0	0	0	0	0	0	0.000164577	0	0	0	0	0	0	0	0	7.38489e-06	0	0	0	0	0	0	0.000109718	2.74296e-05	0	0	0	0	0	2.74296e-05	0	0	0	0.000109718	5.48591e-05	0	0	0
f__Ruminococcaceae	0.275996	0.0444085	0.0258387	0.198206	0.0723044	0.0691774	0.0101215	0.143155	0.115533	0.0539814	0.211647	0.0983076	0.0343967	0.147023	0.140083	0.0566421	0.0110541	0.000438873	0.255122	0.016348	0.0607291	0.103135	0.112297	0.0709055	0.107908	0.218422	0.102045	0.0922731	0.00490989	0.221631	0.134213	0.0938366	0.277286	0.25397	0.167403	0.0648161	0.0528568	0.27649	0.199742	0.190005	0.282607	0.0749925	0.294456	0.12549	0.0195299	0.274488	0.20158	0.055682	0.0993225
g__Butyricicoccus	0.000137148	0.000192007	0.000109718	0.00112461	8.22887e-05	0.000329155	5.48591e-05	0.000274296	0.000384014	8.22887e-05	0.000192007	0.00559563	0.000795458	0.00200236	0.000603451	0.000795458	0.00142634	0	5.48591e-05	0.000932606	0.0019475	0.00128919	0.0103135	0.00337384	0.00326412	2.74296e-05	0.00136093	0.000438873	0.00175549	0.000576021	0.00976493	0.000411444	0.000109718	0.00106975	2.74296e-05	0.000274296	0.00117947	0.00238637	0.00117947	0.00244123	0.0022218	0.000822887	0.00150863	0.0145102	0.00235894	0.00296239	0.000603451	0.00326412	0.000987465
g__Acidaminococcus	0.00257838	0	0	0	0	0	0	0.00929863	0	2.74296e-05	0.000246866	0.00230408	0	2.74296e-05	0	0.00800944	2.74296e-05	0	0.000713169	0.0185973	0	2.74296e-05	0	0.00202979	0.0206819	0.000137148	0.00248871	0	0	0	0	0	0	0	0	0	0	0	2.74296e-05	2.74296e-05	0.00126176	0	0	0	0	0	0	0	0
g__Allisonella	0	0	0	0	0	0	0.00170063	8.22887e-05	5.48591e-05	0.000192007	0.000329155	0.000466303	0	2.74296e-05	0.00109718	0.00378528	0.0112461	0	0.000164577	0.000822887	0	0	2.74296e-05	0.00422415	0.000905176	2.74296e-05	0.00096742	0	0.00126176	0	0	0	0	0	0	8.22887e-05	0.000301725	0.00142634	0	0	0.00480018	2.74296e-05	0	2.74296e-05	0	0	2.74296e-05	0	0
c__Alphaproteobacteria	0.000137148	8.22887e-05	5.48591e-05	5.48591e-05	0	0	0.000137148	0.000192007	0.000274296	0.000493732	0	0.00115204	0	0	0	0	0.000164577	5.48591e-05	2.74296e-05	0	0.000219437	0	0.000493732	0.000137148	0	2.74296e-05	0.000142423	5.48591e-05	0.000109718	0	0.0139068	0.00757056	2.74296e-05	0.000493732	0.000521162	0.00425158	2.74296e-05	2.74296e-05	2.74296e-05	0.000246866	0	0	0.00156349	0.00359327	8.22887e-05	0.00211208	0.000740599	0.00367556	0.00063088
o__Caulobacterales	0	0	0	2.74296e-05	0	0	0	0	0	0	0	0	0	0	0	0	0	2.74296e-05	0	0	0	0	0	0	0	0	2.10997e-06	0	0	0	0.000192007	0	0	0	0.000109718	0	0	0	0	0	0	0	5.48591e-05	0.00117947	2.74296e-05	0.000109718	0	0.00115204	5.48591e-05
f__Caulobacteraceae	0	0	0	2.74296e-05	0	0	0	0	0	0	0	0	0	0	0	0	0	2.74296e-05	0	0	0	0	0	0	0	0	2.10997e-06	0	0	0	0.000192007	0	0	0	0.000109718	0	0	0	0	0	0	0	5.48591e-05	0.00117947	2.74296e-05	0.000109718	0	0.00115204	5.48591e-05
g__Brevundimonas	0	0	0	2.74296e-05	0	0	0	0	0	0	0	0	0	0	0	0	0	2.74296e-05	0	0	0	0	0	0	0	0	2.10997e-06	0	0	0	5.48591e-05	0	0	0	0.000109718	0	0	0	0	0	0	0	0	0.000164577	0	8.22887e-05	0	0.000137148	0
o__Rhizobiales	2.74296e-05	8.22887e-05	5.48591e-05	2.74296e-05	0	0	0.000109718	0.000192007	0.000274296	0.000493732	0	0	0	0	0	0	8.22887e-05	2.74296e-05	2.74296e-05	0	0.000219437	0	0	0.000137148	0	0	6.7519e-05	5.48591e-05	2.74296e-05	0	0.0014812	2.74296e-05	2.74296e-05	0.000493732	0.000411444	2.74296e-05	2.74296e-05	2.74296e-05	2.74296e-05	0.000164577	0	0	0.000548591	0.00115204	5.48591e-05	0.000576021	0.000329155	0.00106975	0.000329155
f__Methylobacteriaceae	0	0	0	2.74296e-05	0	0	0	0	0	0	0	0	0	0	0	0	0	0	0	0	0	0	0	0	0	0	1.05498e-06	0	0	0	0.00106975	0	0	0	0	0	0	0	0	0	0	0	0.000384014	0.000795458	2.74296e-05	0.000466303	0.000219437	0.000740599	0.000192007
g__Methylobacterium	0	0	0	2.74296e-05	0	0	0	0	0	0	0	0	0	0	0	0	0	0	0	0	0	0	0	0	0	0	1.05498e-06	0	0	0	0.00106975	0	0	0	0	0	0	0	0	0	0	0	0.000384014	0.000795458	2.74296e-05	0.000466303	0.000219437	0.000740599	0.000192007
g__Mesorhizobium	0	0	0	0	0	0	0	0	0	0	0	0	0	0	0	0	0	0	2.74296e-05	0	0	0	0	2.74296e-05	0	0	2.10997e-06	0	0	0	2.74296e-05	2.74296e-05	0	0	0	0	0	0	0	0	0	0	0	2.74296e-05	0	0	2.74296e-05	2.74296e-05	0
o__Rhodospirillales	0	0	0	0	0	0	0	0	0	0	0	0	0	0	0	0	0	0	0	0	0	0	0	0	0	0	0	0	0	0	8.22887e-05	0	0	0	0	0	0	0	0	0	0	0	8.22887e-05	0	0	0.000576021	0	0	0
o__Sphingomonadales	2.74296e-05	0	0	0	0	0	2.74296e-05	0	0	0	0	0	0	0	0	0	0	0	0	0	0	0	0	0	0	2.74296e-05	3.16495e-06	0	0	0	0.000603451	0	0	0	0	0	0	0	0	0	0	0	0.000822887	0.00106975	0	0.000740599	0.000329155	0.00126176	0.000246866
f__Sphingomonadaceae	2.74296e-05	0	0	0	0	0	2.74296e-05	0	0	0	0	0	0	0	0	0	0	0	0	0	0	0	0	0	0	2.74296e-05	3.16495e-06	0	0	0	0.000603451	0	0	0	0	0	0	0	0	0	0	0	0.000822887	0.00106975	0	0.000740599	0.000329155	0.00126176	0.000246866
g__Sphingomonas	0	0	0	0	0	0	0	0	0	0	0	0	0	0	0	0	0	0	0	0	0	0	0	0	0	0	0	0	0	0	0.000603451	0	0	0	0	0	0	0	0	0	0	0	0.000685739	0.00106975	0	0.00065831	0.000301725	0.000466303	0.000192007
f__Comamonadaceae	0	0.00063088	2.74296e-05	0	0	0	2.74296e-05	2.74296e-05	0	0	0	2.74296e-05	0	0	0	0	0	0	0	0	0	0	0	0	0	0	2.84846e-05	0	0	0	0.000164577	0	0.00639109	0	0	0	0	2.74296e-05	0	0.000384014	0	0	0.000192007	0.00263324	0	0.000548591	2.74296e-05	0.00164577	0.000246866
g__Acidovorax	0	0	0	0	0	0	0	0	0	0	0	0	0	0	0	0	0	0	0	0	0	0	0	0	0	0	0	0	0	0	5.48591e-05	0	0	0	0	0	0	0	0	0	0	0	5.48591e-05	0.00156349	0	0.000219437	2.74296e-05	0.00128919	0.000192007
g__Comamonas	0	0.00063088	2.74296e-05	0	0	0	0	2.74296e-05	0	0	0	2.74296e-05	0	0	0	0	0	0	0	0	0	0	0	0	0	0	2.74296e-05	0	0	0	0	0	0.00639109	0	0	0	0	0	0	0.000384014	0	0	2.74296e-05	0.000109718	0	2.74296e-05	0	2.74296e-05	5.48591e-05
o__Aeromonadales	0	0	0	0	0	0	0	0	0	0	0	0	0	0	0	0	0	0	0	0	0	0	0	0	0	0	0	0	0	0	0	0	0	0	0	0	0	0	2.74296e-05	2.74296e-05	2.74296e-05	0.000109718	0	0.0016732	0	2.74296e-05	0	0	2.74296e-05
o__Pseudomonadales	0.000329155	0.000164577	0.000246866	5.48591e-05	2.74296e-05	8.22887e-05	0.000274296	0.000548591	0.00117947	0.00153606	0	0	0	0	0	0.000466303	0.000685739	0.00065831	0	0.000246866	2.74296e-05	0.000219437	0	0.000329155	5.48591e-05	0	0.000274296	0.000137148	0.000109718	0.000329155	0.000768028	0.000329155	0.00134405	0.00063088	0.0104507	0.000246866	0	2.74296e-05	0	0	0	2.74296e-05	0.00104232	0.00447102	0	0.00172806	0.000301725	0.000768028	0.00161834
f__Moraxellaceae	2.74296e-05	0	0	0	0	0	2.74296e-05	0	0	0	0	0	0	0	0	0	2.74296e-05	0	0	0	0	0	0	2.74296e-05	0	0	4.21993e-06	0	0	0	0.00063088	0	0	0	0	0	0	2.74296e-05	0	0	0	2.74296e-05	0.000466303	0.00290753	0	0.00115204	0.000219437	0.000466303	0.000850317
g__Acinetobacter	2.74296e-05	0	0	0	0	0	2.74296e-05	0	0	0	0	0	0	0	0	0	2.74296e-05	0	0	0	0	0	0	0	0	0	3.16495e-06	0	0	0	0.000438873	0	0	0	0	0	0	2.74296e-05	0	0	0	2.74296e-05	0.000384014	0.00257838	0	0.000987465	0.000192007	0.000411444	0.000850317
g__Silanimonas	0	0	0	0	0	0	0	0	0	0	0	0	0	0	0	0	0	0	0	0	0	0	0	0	0	0	0	0	0	0	5.48591e-05	0	0	0	0	0	0	0	0	0	0	0	0	0.00367556	2.74296e-05	0.000164577	2.74296e-05	0.000192007	8.22887e-05
g__Stenotrophomonas	0.000301725	2.74296e-05	8.22887e-05	2.74296e-05	2.74296e-05	5.48591e-05	0.000192007	0.000685739	0.00126176	0.000356584	0	0	0	0	0	0	0.000384014	0	0	0	0.000411444	0	0	0	0.000219437	0	0.000155083	8.22887e-05	0.000137148	5.48591e-05	0.000329155	0.000274296	0.000301725	0.00063088	0.00337384	0	0	0	0	0	0	0	0.000246866	0.0036207	0.00065831	0.000274296	0.000301725	0.000137148	0.000246866
[truncated: 5 more columns]
