# Supplementary material for: Gut microbiota induces high platelet response in patients with ST segment elevation myocardial infarction after ticagrelor treatment
Source: eLife. 2022 Mar 8;11:e70240. doi: 10.7554/eLife.70240 (PMC8903831; doi:10.7554/eLife.70240)
Supplement: Figure 6—source data 1. [file elife-70240-fig6-data1.xlsx]

## Sheet: Sheet1
TIC
	0.5h	2h	4h	6h	8h	24h
445	1080.4	711	524.8	225	237.3	176.2
446	714.2	609.4	588.5	77.2	526.4	66.2
447	868.7	573.4	359	157	140.6
448	722.9	404.1	247.3	131.1	121.5	242.7
449	859.6	874.2	647.7	288.2	243.8	98.3
450	1340.5	1457.4	871.9	480.6	276	232.4
866	1017.8	929.5	443.1	348.8	173.2	499.3
867	224.1	644.9	156.9	40.9	63.2
868	254.9	302.3	519.8	266.5
869	363.2	722.7	423.5	258.7	434.6	173.7
870	259.3	328.8	239.5	119.6	72.4
871	374.5	325.4	250.1	140.1	151.6	77.1
872	376.4	644	538	141.6	213.8	69.5
ARC-121	0.5h	2h	4h	6h	8h	24h
445	482	421.2	175.8	99.8	57.6	156.5
446	279.9	220.5	53.3	19.1	14.8	36
447	330.6	295.2	116.2	60.2	46.1
448	283.3	306.3	68.8	44	43.8	187.4
449	303.5	463.9	237.6	106.2	69.4	82.2
450	115.2	74.9	34	25.6	29.6	96.5
866	439.8	335.8	162.2	77.3	45.6	460
867	49.5	23.9	17.4	9.1	7
868	33.6	37.9	121.9	104
869	368.4	254.4	128.1	93	44.8	132.7
870	109	240.7	141.2	53.1	28.2
871	345.7	426.2	301.6	179.1	106.9	195.7
872	344.5	319.7	167.6	69	69.8	130.6

## Sheet: Sheet2
TIC
	0.5h	2h	4h	6h	8h	24h			0.5h	2h	4h	6h	8h	24h
445	1080.4	711	524.8	225	237.3	176.2		866	1017.8	929.5	443.1	348.8	173.2	499.3
446	714.2	609.4	588.5	77.2	526.4	66.2		867	224.1	644.9	156.9	40.9	63.2
447	868.7	573.4	359	157	140.6			868	254.9	302.3	519.8	266.5
448	722.9	404.1	247.3	131.1	121.5	242.7		869	963.2	722.7	423.5	258.7	434.6	173.7
449	859.6	874.2	647.7	288.2	243.8	98.3		870	259.3	328.8	239.5	119.6	72.4
450	374.5	325.4	250.1	140.1	151.6	77.1		871	1340.5	1457.4	871.9	480.6	276	232.4
	1137.55	2275.1	1734.8	937.7	251.7	106.7		872	776.4	644	538	141.6	213.8	69.5
	891	1781.9	1476.1	647.5	387.1	157.6			146	293.3	296.5	267.8	99.3	251.6
	369.1	738.1	900.5	1184.9	774.9	231.1			723	1446.3	1046.7	739.6	800.4	450.4
	833.9	1667.8	1384.6	500.6	319.3	144.5
	785.185	996.04	811.34	428.93	315.42	144.489			633.911	752.133	503.989	296.011	266.613	279.483
	255.626	666.31	540.323	382.161	203.056	63.7929			429.141	450.954	290.466	211.168	248.378	164.809
	0.35766	0.368899	0.14747	0.36909	0.652181	0.0423548
ARC-121	0.5h	2h	4h	6h	8h	24h				0.5h	2h	4h	6h	8h	24h
445	482	421.2	175.8	99.8	57.6	156.5			866	439.8	335.8	162.2	77.3	45.6	460
446	279.9	220.5	53.3	19.1	14.8	36			867	49.5	23.9	17.4	9.1	7
447	330.6	295.2	116.2	60.2	46.1				868	33.6	37.9	121.9	104
448	283.3	306.3	68.8	44	43.8	187.4			869	368.4	254.4	128.1	93	44.8	132.7
449	303.5	463.9	237.6	106.2	69.4	82.2			870	109	240.7	141.2	53.1	28.2
450	115.2	74.9	34	25.6	29.6	96.5			871	345.7	426.2	301.6	179.1	106.9	195.7
	218.9	437.8	552.2	358.1	48	31.7			872	344.5	119.7	167.6	69	69.8	130.6
	151.55	303.1	451.6	240.9	63.8	12.5				19.7	39.4	80.4	38.7	21.6	53.3
	2.55	5.1	41.7	78.2	21	15.8				113.55	227.1	352.1	299.5	221.1	150.1
	106.3	212.6	349.4	131.4	60.6	19.7
	227.38	274.06	208.06	116.35	45.47	70.9222				202.639	189.456	163.611	102.533	68.125	187.067
	137.752	151.1	185.409	106.508	18.5159	64.716				168.267	142.954	103.918	87.864	69.1313	141.401
	0.72899	0.228276	0.534507	0.763099	0.332463	0.0486972

## Sheet: Sheet3
TIC
	0.5h	2h	4h	6h	8h	24h			0.5h	2h	4h	6h	8h	24h
445	1080.4	711	524.8	225	237.3	176.2		866
446	714.2	609.4	588.5		526.4			867	224.1	644.9	156.9		63.2
447	868.7	573.4	359	157	140.6			868	254.9	302.3	519.8	266.5
448	722.9			131.1	121.5	242.7		869		722.7	423.5	258.7	434.6	173.7
449	859.6	874.2	647.7	288.2	243.8			870	259.3	328.8	239.5	119.6	72.4
450								871
	1137.55	2275.1	1734.8	937.7	251.7			872	776.4	644	538	141.6	213.8	69.5
	891	1781.9	1476.1	647.5	387.1				146	293.3	296.5	267.8	99.3
	833.9	1667.8	1384.6	500.6	319.3
	888.531	1213.26	959.357	412.443	278.463	209.45			332.14	489.333	362.367	210.84	176.66	121.6
	151.596	682.978	552.736	298.299	132.124	47.0226			252.468	200.88	155.577	73.7427	156.237	73.6805
	0.00039023	0.0299607	0.027193	0.174811	0.232646	0.291107
	888.531	1213.26	959.357	412.443	278.463	175.2			332.14	489.333	362.367	182.517	176.66	121.6
	151.596	682.978	552.736	298.299	132.124	68.0055			252.468	200.88	155.577	95.727	156.237	73.6805
	888.531	151.596							332.14	252.468
	1213.26	682.978							489.333	200.88
	959.357	552.736							362.367	155.577
	412.443	298.299							182.517	95.727
	278.463	132.124							176.66	156.237
	175.2	68.0055							121.6	73.6805
ARC-121	0.5h	2h	4h	6h	8h	24h				0.5h	2h	4h	6h	8h	24h
445	482	421.2	175.8	99.8	57.6	156.5			866
446	279.9	220.5	53.3						867	49.5	23.9	17.4	9.1	7
447	330.6	295.2	116.2	60.2	46.1				868	33.6	37.9	121.9	104
448	283.3	306.3	68.8	44	43.8	187.4			869			128.1	93	44.8	132.7
449	303.5	463.9	237.6	106.2	69.4	82.2			870	109	240.7	141.2	53.1	28.2
450									871
	218.9	437.8	552.2	358.1	48				872		119.7	167.6	69	69.8	130.6
	151.55	303.1	451.6	240.9	63.8					19.7	39.4	80.4	38.7	21.6
	106.3	212.6	349.4	131.4	60.6
	269.506	332.575	250.613	148.657	55.6143	142.033				52.95	92.32	109.433	61.15	34.28	131.65
	115.543	97.1625	183.976	112.28	9.78033	54.0715				39.3001	91.1176	53.3093	35.1857	24.0535	1.48492
	0.00508968	0.00100204	0.095881	0.0954703	0.0576536	0.813384
	269.506	332.575	250.613	148.657	55.6143	142.033				52.95	92.32	109.433	61.15	34.28	131.65
	115.543	97.1625	183.976	112.28	9.78033	54.0715				39.3001	91.1176	53.3093	35.1857	24.0535	1.48492
	269.506	115.543								52.95	39.3001
	332.575	97.1625								92.32	91.1176
	250.613	183.976								109.433	53.3093
	148.657	112.28								61.15	35.1857
	55.6143	9.78033								34.28	24.0535
	142.033	54.0715								131.65	1.48492
